# Supplementary material for: Environmental filtering of body size and darker coloration in pollinator communities indicate thermal restrictions on bees, but not flies, at high elevations
Source: PeerJ. 2019 Oct 14;7:e7867. doi: 10.7717/peerj.7867 (PMC6796954; doi:10.7717/peerj.7867)
Supplement: File S1 — Raw data measurements of bee and fly volume and darkness. [file peerj-07-7867-s001.xlsx]

## Sheet: peerj-32951-Supplemental_File_2
family	scientificName	habitat	Dakness	Volume
Anthomyiidae	ANT 001	Mixed Conifer	58.158	69.1457
Anthomyiidae	ANT 001	Mixed Conifer	102.313	10.4663
Anthomyiidae	ANT 001	Mixed Conifer	86.674	27.0131
Anthomyiidae	ANT 001	Mixed Conifer	70.673	17.6498
Anthomyiidae	ANT 001	Mixed Conifer	122.98	2.61699
Anthomyiidae	ANT 001	Mixed Conifer	116.335	5.35198
Anthomyiidae	ANT 001	Ponderosa	114.604	18.0867
Anthomyiidae	ANT 001	Spruce-fir	54.032	93.8409
Anthomyiidae	ANT 001	Spruce-fir	54.153	106.06
Anthomyiidae	ANT 001	Spruce-fir	63.639	14.8277
Anthomyiidae	ANT 001	Spruce-fir	82.3817	35.5417
Anthomyiidae	ANT 001	Spruce-fir	86.5533	18.3764
Anthomyiidae	ANT 002	Mixed Conifer	93.4423	15.76
Anthomyiidae	ANT 002	Ponderosa	103.329	8.5396
Anthomyiidae	ANT 002	Spruce-fir	117.973	8.68522
Anthomyiidae	ANT 002	Spruce-fir	94.9903	39.0932
Anthomyiidae	ANT 002	Spruce-fir	74.263	72.6624
Anthomyiidae	ANT 002	Spruce-fir	57.2747	71.576
Anthomyiidae	ANT 002	Spruce-fir	66.7246	52.143
Anthomyiidae	ANT 002	Spruce-fir	77.5247	22.9153
Anthomyiidae	ANT 002	Spruce-fir	87.4591	23.226
Anthomyiidae	ANT 002	Spruce-fir	94.4417	14.2253
Anthomyiidae	ANT 002	Spruce-fir	104.915	10.9949
Bombyliidae	BOM 001	Mixed Conifer	85.607	147.24
Bombyliidae	BOM 001	Ponderosa	67.862	118.052
Bombyliidae	BOM 001	Spruce-fir	73.651	264.687
Bombyliidae	BOM 002	Spruce-fir	67.468	221.551
Bombyliidae	BOM BOM 001	major	84.462	122.803
Bombyliidae	BOM HEM 001	sinuosa	69.6603	201.43
Bombyliidae	BOM PHT 001	Spruce-fir	75.1937	203.014
Bombyliidae	BOM PHT 001	Spruce-fir	73.8634	181.928
Bombyliidae	Hemipenthes sinuosa	Mixed Conifer	47.865	49.6169
Bombyliidae	Hemipenthes sinuosa	Mixed Conifer	50.948	108.109
Bombyliidae	Hemipenthes sinuosa	Mixed Conifer	55.214	156.4
Bombyliidae	Hemipenthes sinuosa	Mixed Conifer	51.3423	104.709
Calliphoridae	CAL CYN 001	Spruce-fir	87.964	26.4938
Calliphoridae	CAL CYN 001	Spruce-fir	53.671	17.7481
Calliphoridae	CAL CYN 001	Spruce-fir	65.778	26.1875
Calliphoridae	Cynomya cadaverina	Mixed Conifer	61.922	319.316
Calliphoridae	Cynomya cadaverina	Mixed Conifer	74.389	59.2041
Calliphoridae	Cynomya cadaverina	Mixed Conifer	55.723	155.96
Calliphoridae	Cynomya cadaverina	Mixed Conifer	63.824	200.456
Calliphoridae	Cynomya cadaverina	Mixed Conifer	70.168	293.231
Calliphoridae	Cynomya cadaverina	Mixed Conifer	64.0113	178.16
Calliphoridae	Cynomya cadaverina	Ponderosa	64.6453	138.54
Calliphoridae	Cynomya cadaverina	Ponderosa	63.2383	216.549
Muscidae	MUS 001	Mixed Conifer	45.923	6.94743
Muscidae	MUS 001	Mixed Conifer	95.222	11.1336
Muscidae	MUS 001	Mixed Conifer	75.628	13.8121
Muscidae	MUS 001	Mixed Conifer	81.007	18.6908
Muscidae	MUS 001	Mixed Conifer	74.457	15.9034
Muscidae	MUS 001	Mixed Conifer	47.065	54.3875
Muscidae	MUS 001	Mixed Conifer	83.196	27.9061
Muscidae	MUS 001	Mixed Conifer	77.089	62.1089
Muscidae	MUS 001	Mixed Conifer	72.2577	10.631
Muscidae	MUS 001	Mixed Conifer	83.9523	14.5455
Muscidae	MUS 001	Mixed Conifer	77.0307	16.1355
Muscidae	MUS 001	Mixed Conifer	67.5097	29.6606
Muscidae	MUS 001	Mixed Conifer	68.2393	32.7324
Muscidae	MUS 001	Mixed Conifer	69.1167	48.1342
Muscidae	MUS 001	Mixed Conifer	77.5142	33.5487
Muscidae	MUS 001	Mixed Conifer	77.7663	29.0951
Muscidae	MUS 001	Mixed Conifer	77.7469	13.7707
Muscidae	MUS 001	Mixed Conifer	76.1642	20.1139
Muscidae	MUS 001	Mixed Conifer	70.9266	26.1761
Muscidae	MUS 001	Mixed Conifer	68.2886	36.8424
Muscidae	MUS 001	Mixed Conifer	71.6234	38.1384
Muscidae	MUS 001	Mixed Conifer	74.7991	36.926
Muscidae	MUS 001	Mixed Conifer	77.6758	25.4715
Muscidae	MUS 001	Mixed Conifer	77.2258	20.9932
Muscidae	MUS 001	Ponderosa	74.9459	20.0202
Muscidae	MUS 001	Ponderosa	71.7931	27.7108
Muscidae	MUS 001	Ponderosa	70.2795	33.719
Muscidae	MUS 001	Ponderosa	71.5703	37.3023
Muscidae	MUS 001	Ponderosa	74.6994	33.512
Muscidae	MUS 001	Ponderosa	76.5669	27.7969
Muscidae	MUS 001	Ponderosa	76.6158	22.1616
Muscidae	MUS 001	Ponderosa	74.6549	22.9081
Muscidae	MUS 001	Ponderosa	72.3395	27.15
Muscidae	MUS 001	Ponderosa	71.2143	32.9107
Muscidae	MUS 001	Ponderosa	72.1831	34.8444
Muscidae	MUS 001	Ponderosa	74.2789	32.8704
Muscidae	MUS 001	Ponderosa	75.9607	27.8235
Muscidae	MUS 001	Ponderosa	75.9459	24.2889
Muscidae	MUS 001	Ponderosa	74.5368	24.0732
Muscidae	MUS 001	Ponderosa	72.7363	27.6562
Muscidae	MUS 001	Ponderosa	71.9123	31.635
Muscidae	MUS 001	Ponderosa	72.5588	33.5418
Muscidae	MUS 001	Ponderosa	74.1409	31.8461
Muscidae	MUS 001	Ponderosa	75.3952	28.3276
Muscidae	MUS 001	Ponderosa	75.4811	25.3952
Muscidae	MUS 001	Ponderosa	74.4063	25.3395
Muscidae	MUS 001	Ponderosa	73.0618	27.7882
Muscidae	MUS 001	Ponderosa	72.4024	30.9444
Muscidae	MUS 001	Ponderosa	72.8707	32.341
Muscidae	MUS 001	Ponderosa	74.0316	31.2385
Muscidae	MUS 001	Ponderosa	75.0057	28.523
Muscidae	MUS 001	Ponderosa	75.0942	26.3541
Muscidae	MUS 001	Spruce-fir	74.3164	26.1743
Muscidae	MUS 001	Spruce-fir	73.2902	28.024
Muscidae	MUS 001	Spruce-fir	72.7783	30.3578
Muscidae	MUS 001	Spruce-fir	73.1016	31.5079
Muscidae	MUS 001	Spruce-fir	73.9693	30.7008
Muscidae	MUS 001	Spruce-fir	74.7105	28.7052
Muscidae	MUS 001	Spruce-fir	74.8054	27.0171
Muscidae	MUS 001	Spruce-fir	74.2336	26.8508
Muscidae	MUS 001	Spruce-fir	73.4616	28.1854
Muscidae	MUS 001	Spruce-fir	73.0567	29.9633
Muscidae	MUS 001	Spruce-fir	73.2831	30.8555
Muscidae	MUS 001	Spruce-fir	73.9271	30.3046
Muscidae	MUS 001	Spruce-fir	74.4951	28.8077
Muscidae	MUS 001	Spruce-fir	74.5832	27.5244
Muscidae	MUS 001	Spruce-fir	74.1669	27.3511
Muscidae	MUS 001	Spruce-fir	73.584	28.3331
Muscidae	MUS 001	Spruce-fir	73.2671	29.6681
Muscidae	MUS 001	Spruce-fir	73.4223	30.3745
Muscidae	MUS 001	Spruce-fir	73.9018	29.9893
Muscidae	MUS 001	Spruce-fir	74.3351	28.8789
Muscidae	MUS 001	Spruce-fir	74.4151	27.8944
Muscidae	MUS 001	Spruce-fir	74.1113	27.7362
Muscidae	MUS 001	Spruce-fir	73.6727	28.4508
Muscidae	MUS 001	Spruce-fir	73.4245	29.4586
Muscidae	MUS 001	Spruce-fir	73.5304	30.0106
Muscidae	MUS 001	Spruce-fir	73.8864	29.7476
Muscidae	MUS 001	Spruce-fir	74.2173	28.9209
Muscidae	MUS 001	Spruce-fir	74.2872	28.1698
Muscidae	MUS 001	Spruce-fir	74.0664	28.0271
Muscidae	MUS 001	Spruce-fir	73.7362	28.5485
Muscidae	MUS 002	Mixed Conifer	73.5425	29.3066
Muscidae	MUS 002	Mixed Conifer	73.6138	29.7389
Muscidae	MUS 002	Mixed Conifer	73.878	29.5597
Muscidae	MUS 002	Mixed Conifer	74.1303	28.9461
Muscidae	MUS 002	Mixed Conifer	74.1903	28.3726
Muscidae	MUS 002	Mixed Conifer	74.0299	28.2485
Muscidae	MUS 002	Ponderosa	73.7817	28.6274
Muscidae	MUS 002	Ponderosa	73.6308	29.198
Muscidae	MUS 002	Ponderosa	73.6781	29.5351
Muscidae	MUS 002	Ponderosa	73.874	29.4149
Muscidae	MUS 002	Ponderosa	74.0662	28.9595
Muscidae	MUS 002	Ponderosa	74.1168	28.5224
Muscidae	MUS 002	Ponderosa	74.0006	28.4162
Muscidae	MUS 002	Ponderosa	73.8141	28.6913
Muscidae	MUS 002	Ponderosa	73.6969	29.1202
Muscidae	MUS 002	Ponderosa	73.7276	29.3827
Muscidae	MUS 002	Ponderosa	73.8728	29.3031
Muscidae	MUS 002	Spruce-fir	74.019	28.9656
Muscidae	MUS 002	Spruce-fir	74.0612	28.6327
Muscidae	MUS 002	Spruce-fir	73.9772	28.5433
Muscidae	MUS 002	Spruce-fir	73.8372	28.7425
Muscidae	MUS 002	Spruce-fir	73.7462	29.0647
Muscidae	MUS 002	Spruce-fir	73.7658	29.2687
Muscidae	MUS 002	Spruce-fir	73.8731	29.2171
Muscidae	MUS 002	Spruce-fir	73.9843	28.9671
Muscidae	MUS 002	Spruce-fir	74.0191	28.7138
Muscidae	MUS 002	Spruce-fir	73.9585	28.6395
Muscidae	MUS 002	Spruce-fir	73.8535	28.7835
Muscidae	MUS 002	Spruce-fir	73.7831	29.0253
Muscidae	MUS 002	Spruce-fir	73.795	29.1835
Muscidae	MUS 002	Spruce-fir	73.8744	29.151
Muscidae	MUS 002	Spruce-fir	73.9589	28.966
Muscidae	MUS 002	Spruce-fir	73.9873	28.7735
Muscidae	MUS 002	Spruce-fir	73.9437	28.7123
Muscidae	MUS 002	Spruce-fir	73.865	28.8161
Muscidae	MUS 002	Spruce-fir	73.8105	28.9974
Muscidae	MUS 002	Spruce-fir	73.8175	29.1199
Muscidae	MUS 002	Spruce-fir	73.8761	29.1002
Muscidae	MUS 002	Spruce-fir	73.9402	28.9635
Muscidae	MUS 002	Spruce-fir	73.9633	28.8173
Muscidae	MUS 002	Spruce-fir	73.932	28.7673
Muscidae	MUS 002	Spruce-fir	73.8731	28.8419
Muscidae	MUS 002	Spruce-fir	73.831	28.9778
Muscidae	MUS 002	Spruce-fir	73.8347	29.0725
Muscidae	MUS 002	Spruce-fir	73.8779	29.0612
Muscidae	MUS 002	Spruce-fir	73.9265	28.9603
Muscidae	MUS 002	Spruce-fir	73.9452	28.8494
Muscidae	MUS 002	Spruce-fir	73.9228	28.8088
Muscidae	MUS 002	Spruce-fir	73.8787	28.8624
Muscidae	MUS 002	Spruce-fir	73.8463	28.9641
Muscidae	MUS 002	Spruce-fir	73.8479	29.0372
Muscidae	MUS 002	Spruce-fir	73.8797	29.0313
Muscidae	MUS 002	Spruce-fir	73.9166	28.957
Muscidae	MUS 002	Spruce-fir	73.9315	28.8728
Muscidae	MUS 002	Spruce-fir	73.9156	28.8402
Muscidae	MUS 002	Spruce-fir	73.8826	28.8784
Muscidae	MUS 002	Spruce-fir	73.8576	28.9545
Muscidae	MUS 002	Spruce-fir	73.858	29.0109
Muscidae	MUS 002	Spruce-fir	73.8814	29.0085
Muscidae	MUS 002	Spruce-fir	73.9093	28.9537
Muscidae	MUS 002	Spruce-fir	73.9212	28.89
Muscidae	MUS 002	Spruce-fir	73.9099	28.8638
Muscidae	MUS 003	Mixed Conifer	73.8853	28.8911
Muscidae	MUS 003	Mixed Conifer	73.8661	28.9479
Muscidae	MUS 003	Mixed Conifer	73.8657	28.9913
Muscidae	MUS 003	Mixed Conifer	73.8829	28.991
Muscidae	MUS 003	Ponderosa	73.904	28.9507
Muscidae	MUS 003	Ponderosa	73.9135	28.9025
Muscidae	MUS 003	Ponderosa	73.9055	28.8816
Muscidae	MUS 003	Ponderosa	73.8871	28.9009
Muscidae	MUS 003	Ponderosa	73.8723	28.9434
Muscidae	MUS 003	Spruce-fir	73.8715	28.9768
Muscidae	MUS 003	Spruce-fir	73.8842	28.9777
Muscidae	MUS 003	Spruce-fir	73.9001	28.9481
Muscidae	MUS 003	Spruce-fir	73.9076	28.9116
Muscidae	MUS 003	Spruce-fir	73.902	28.895
Muscidae	MUS 003	Spruce-fir	73.8883	28.9087
Muscidae	MUS 003	Spruce-fir	73.877	28.9404
Muscidae	MUS 003	Spruce-fir	73.876	28.966
Muscidae	MUS 003	Spruce-fir	73.8853	28.9675
Muscidae	MUS 003	Spruce-fir	73.8973	28.9458
Muscidae	MUS 003	Spruce-fir	73.9032	28.9182
Muscidae	MUS 003	Spruce-fir	73.8993	28.9051
Muscidae	MUS 003	Spruce-fir	73.8891	28.9147
Muscidae	MUS 003	Spruce-fir	73.8804	28.9383
Muscidae	MUS 003	Spruce-fir	73.8794	28.9579
Muscidae	MUS 003	Spruce-fir	73.8862	28.9598
Muscidae	MUS 003	Spruce-fir	73.8953	28.9439
Muscidae	MUS 003	Spruce-fir	73.9	28.923
Muscidae	MUS 003	Spruce-fir	73.8972	28.9127
Muscidae	MUS 003	Spruce-fir	73.8896	28.9194
Muscidae	MUS 003	Spruce-fir	73.883	28.937
Muscidae	MUS 003	Spruce-fir	73.882	28.952
Muscidae	MUS 003	Spruce-fir	73.887	28.9539
Muscidae	MUS 003	Spruce-fir	73.8938	28.9422
Muscidae	MUS 003	Spruce-fir	73.8975	28.9265
Muscidae	MUS 003	Spruce-fir	73.8956	28.9184
Muscidae	MUS 003	Spruce-fir	73.8899	28.923
Muscidae	MUS 003	Spruce-fir	73.8849	28.9361
Muscidae	MUS 003	Spruce-fir	73.884	28.9476
Muscidae	MUS 003	Spruce-fir	73.8876	28.9494
Muscidae	MUS 003	Spruce-fir	73.8928	28.9409
Muscidae	MUS 003	Spruce-fir	73.8956	28.929
Muscidae	MUS 003	Spruce-fir	73.8943	28.9226
Muscidae	MUS 003	Spruce-fir	73.8901	28.9258
Muscidae	MUS 003	Spruce-fir	73.8863	28.9356
Muscidae	MUS 003	Spruce-fir	73.8855	28.9444
Muscidae	MUS 003	Spruce-fir	73.8881	28.9459
Muscidae	MUS 003	Spruce-fir	73.892	28.9398
Muscidae	MUS 003	Spruce-fir	73.8942	28.9308
Muscidae	MUS 003	Spruce-fir	73.8934	28.9258
Muscidae	MUS 003	Spruce-fir	73.8902	28.928
Muscidae	MUS 003	Spruce-fir	73.8873	28.9353
Muscidae	MUS 003	Spruce-fir	73.8866	28.942
Muscidae	MUS 003	Spruce-fir	73.8885	28.9434
Muscidae	MUS 003	Spruce-fir	73.8914	28.9388
Muscidae	MUS 003	Spruce-fir	73.8932	28.9321
Muscidae	MUS 003	Spruce-fir	73.8926	28.9282
Muscidae	MUS 003	Spruce-fir	73.8903	28.9297
Muscidae	MUS 003	Spruce-fir	73.8881	28.9351
Muscidae	MUS 003	Spruce-fir	73.8875	28.9402
Muscidae	MUS 003	Spruce-fir	73.8889	28.9414
Muscidae	MUS 003	Spruce-fir	73.8911	28.9381
Muscidae	MUS 003	Spruce-fir	73.8924	28.9331
Muscidae	MUS 003	Spruce-fir	73.892	28.93
Muscidae	MUS 003	Spruce-fir	73.8903	28.931
Muscidae	MUS 003	Spruce-fir	73.8886	28.935
Muscidae	MUS 003	Spruce-fir	73.8881	28.9389
Muscidae	MUS COE 001	Mixed Conifer	82.65	49.5967
Sarcophagidae	SAR SAR 001	Mixed Conifer	83.378	255.922
Sarcophagidae	SAR SAR 001	Mixed Conifer	79.125	62.6577
Sarcophagidae	SAR SAR 001	Mixed Conifer	55.159	125.929
Sarcophagidae	SAR SAR 001	Mixed Conifer	78.277	154.107
Sarcophagidae	SAR SAR 001	Mixed Conifer	77.814	45.4303
Sarcophagidae	SAR SAR 001	Mixed Conifer	81.211	293.97
Sarcophagidae	SAR SAR 001	Ponderosa	46.675	146.681
Sarcophagidae	SAR SAR 001	Ponderosa	63.374	204.316
Sarcophagidae	SAR SAR 001	Ponderosa	66.549	84.2241
Sarcophagidae	SAR SAR 001	Spruce-fir	61.4947	107.402
Sarcophagidae	SAR SAR 001	Spruce-fir	75.0097	204.782
Sarcophagidae	SAR SAR 002	Mixed Conifer	74.496	64.104
Sarcophagidae	SAR SAR 002	Mixed Conifer	65.9549	175.767
Sarcophagidae	SAR SAR 002	Mixed Conifer	66.6539	168.523
Sarcophagidae	SAR SAR 002	Mixed Conifer	71.8947	104.617
Sarcophagidae	SAR SAR 002	Mixed Conifer	71.2383	184.654
Sarcophagidae	SAR SAR 002	Ponderosa	58.2745	140.869
Sarcophagidae	SAR SAR 002	Ponderosa	70.0928	171.238
Sarcophagidae	SAR SAR 002	Ponderosa	70.7611	110.994
Sarcophagidae	SAR SAR 002	Ponderosa	61.908	141.346
Sarcophagidae	SAR SAR 002	Spruce-fir	70.5854	181.514
Sarcophagidae	SAR SAR 002	Spruce-fir	72.3839	93.2382
Sarcophagidae	SAR SAR 003	Mixed Conifer	66.3671	167.256
Sarcophagidae	SAR SAR 003	Mixed Conifer	65.1713	163.636
Sarcophagidae	SAR SAR 003	Mixed Conifer	71.4571	123.031
Sarcophagidae	SAR SAR 003	Mixed Conifer	69.4555	154.301
Sarcophagidae	SAR SAR 003	Mixed Conifer	61.7846	148.617
Sarcophagidae	SAR SAR 003	Ponderosa	70.7118	158.595
Sarcophagidae	SAR SAR 003	Ponderosa	70.8668	119.511
Sarcophagidae	SAR SAR 003	Ponderosa	63.3532	152.406
Sarcophagidae	SAR SAR 003	Spruce-fir	68.8228	167.915
Sarcophagidae	SAR SAR 003	Spruce-fir	71.5693	111.927
Sarcophagidae	SAR SAR 003	Spruce-fir	66.3919	157.988
Syrphidae	Eupeodes volucris	Spruce-fir	78.119	255.941
Syrphidae	SYR 001	Mixed Conifer	68.984	39.5885
Syrphidae	SYR 001	Mixed Conifer	43.745	40.974
Syrphidae	SYR 002	Mixed Conifer	45.958	27.644
Syrphidae	SYR 002	Mixed Conifer	68.67	161.944
Syrphidae	SYR 003	Mixed Conifer	54.091	86.1453
Syrphidae	SYR 003	Ponderosa	68.709	344.731
Syrphidae	SYR CHR 001	Mixed Conifer	58.962	316.087
Syrphidae	SYR CHR 001	Mixed Conifer	81.211	293.97
Syrphidae	SYR CHR 001	Mixed Conifer	55.208	16.4028
Syrphidae	SYR CHR 001	Mixed Conifer	63.355	55.1479
Syrphidae	SYR CHR 001	Ponderosa	78.119	255.941
Syrphidae	SYR CHR 001	Ponderosa	62.8804	111.022
Syrphidae	SYR CHR 001	Spruce-fir	63.8886	115.116
Syrphidae	SYR CHR 001	Spruce-fir	65.4309	170.597
Syrphidae	SYR CHR 001	Spruce-fir	66.5118	228.58
Syrphidae	SYR CHR 002	Mixed Conifer	66.4746	201.359
Syrphidae	SYR CHR 002	Ponderosa	66.4501	164.933
Syrphidae	SYR CHR 002	Ponderosa	63.3961	134.417
Syrphidae	SYR CHR 002	Spruce-fir	68.1821	181.192
Syrphidae	SYR CHR 003	Mixed Conifer	67.464	173.534
Syrphidae	SYR CHR 003	Ponderosa	64.9594	141.336
Syrphidae	SYR CHR 003	Spruce-fir	65.6723	154.972
Syrphidae	SYR CHR 003	Spruce-fir	66.5096	179.048
Syrphidae	SYR EUM 001	Mixed Conifer	66.2164	179.956
Syrphidae	SYR EUM 001	Mixed Conifer	66.0132	168.33
Syrphidae	SYR TOX 001	Mixed Conifer	65.6489	162.665
Syrphidae	SYR TOX 001	Mixed Conifer	66.0635	168.589
Syrphidae	SYR TOX 001	Mixed Conifer	66.7049	173.135
Syrphidae	SYR TOX 001	Mixed Conifer	66.0298	162.891
Syrphidae	SYR TOX 001	Mixed Conifer	65.8098	160.139
Syrphidae	SYR TOX 001	Mixed Conifer	66.196	167.727
Syrphidae	SYR TOX 001	Mixed Conifer	66.2541	171.034
Tabanidae	TAB 001	Spruce-fir	66.0531	167.809
Tabanidae	TAB 001	Spruce-fir	65.9844	165.979
Tabanidae	TAB 001	Spruce-fir	66.0431	167.565
Tachinidae	Adejeania vexatrix	Mixed Conifer	53.696	709.183
Tachinidae	TAC 001	Ponderosa	77.96	348.852
Tachinidae	TAC 001	Ponderosa	68.004	155.749
Tachinidae	TAC 001	Ponderosa	63.374	204.316
Tachinidae	TAC 001	Ponderosa	80.416	214.547
Tachinidae	TAC 001	Ponderosa	86.552	301.826
Tachinidae	TAC 001	Ponderosa	64.061	98.1025
Tachinidae	TAC 001	Ponderosa	53.598	94.7146
Tachinidae	TAC 001	Ponderosa	63.639	14.8277
Tachinidae	TAC 001	Ponderosa	85.153	66.2714
Tachinidae	TAC 001	Ponderosa	72.642	38.3913
Tachinidae	TAC 001	Ponderosa	82.82	29.888
Tachinidae	TAC 001	Spruce-fir	77.96	348.852
Tachinidae	TAC 001	Spruce-fir	76.862	171.607
Tachinidae	TAC 001	Spruce-fir	84.556	66.4784
Tachinidae	TAC 001	Spruce-fir	49.606	102.525
Tachinidae	TAC 001	Spruce-fir	57.24	107.676
Tachinidae	TAC 002	Ponderosa	68.609	200.27
Tachinidae	TAC 002	Ponderosa	59.988	197.343
Tachinidae	TAC 002	Ponderosa	61.394	159.131
Tachinidae	TAC 002	Ponderosa	61.895	65.3903
Tachinidae	TAC 002	Ponderosa	44.81	169.949
Tachinidae	TAC 002	Ponderosa	70.9775	160.904
Tachinidae	TAC 002	Ponderosa	71.1298	173.449
Tachinidae	TAC 002	Ponderosa	67.7636	125.428
Tachinidae	TAC 002	Ponderosa	71.9909	128.15
Tachinidae	TAC 002	Ponderosa	73.9787	197.733
Tachinidae	TAC 002	Ponderosa	74.5167	116.033
Tachinidae	TAC 002	Spruce-fir	71.1937	99.3294
Tachinidae	TAC 002	Spruce-fir	67.6454	65.8184
Tachinidae	TAC 002	Spruce-fir	72.8867	155.532
Tachinidae	TAC 002	Spruce-fir	71.4396	119.022
Tachinidae	TAC 002	Spruce-fir	75.0627	112.31
Tachinidae	TAC 002	Spruce-fir	65.0999	182.382
Tachinidae	TAC 003	Spruce-fir	67.7649	114.246
Tachinidae	TAC 003	Ponderosa	65.7687	154.77
Tachinidae	TAC 003	Ponderosa	62.0841	143.755
Tachinidae	TAC 003	Ponderosa	63.8831	148.756
Tachinidae	TAC 003	Ponderosa	65.0879	133.711
Tachinidae	TAC 003	Ponderosa	60.168	161.049
Tachinidae	TAC 003	Ponderosa	67.8595	162.87
Tachinidae	TAC 003	Ponderosa	66.9274	128.98
Tachinidae	TAC 003	Ponderosa	62.9067	139.394
Tachinidae	TAC 003	Ponderosa	69.3853	120.963
Tachinidae	TAC 003	Ponderosa	70.2254	166.527
Tachinidae	TAC 003	Spruce-fir	70.7763	120.361
Tachinidae	TAC 003	Spruce-fir	72.1182	126.579
Tachinidae	TAC 003	Spruce-fir	69.3751	141.574
Tachinidae	TAC 003	Spruce-fir	71.8216	128.097
Tachinidae	TAC 003	Spruce-fir	69.4443	128.674
Tachinidae	TAC 003	Spruce-fir	69.1535	112.495
Tachinidae	TAC ARC 003	Mixed Conifer	70.804	217.036
Tachinidae	TAC ARC 003	Mixed Conifer	84.218	396.041
Tachinidae	TAC ARC 003	Mixed Conifer	85.873	173.786
Tachinidae	TAC ARC 003	Mixed Conifer	76.862	171.607
Tachinidae	TAC ARC 003	Mixed Conifer	75.899	430.095
Tachinidae	TAC ARC 003	Mixed Conifer	54.812	147.025
Tachinidae	TAC ARC 003	Mixed Conifer	57.376	202.709
Tachinidae	TAC ARC 003	Mixed Conifer	86.552	301.826
Tachinidae	TAC ARC 003	Mixed Conifer	66.377	245.745
Tachinidae	TAC ARC 003	Mixed Conifer	103.26	193.817
Tachinidae	TAC ARC 003	Mixed Conifer	69.111	144.994
Tachinidae	TAC ARC 003	Mixed Conifer	80.416	214.547
Tachinidae	TAC ARC 003	Mixed Conifer	54.032	93.8409
Tachinidae	TAC ARC 003	Mixed Conifer	54.153	106.06
Tachinidae	TAC ARC 003	Mixed Conifer	30.664	23.8141
Tachinidae	TAC ARC 003	Mixed Conifer	44.81	169.949
Tachinidae	TAC ARC 003	Mixed Conifer	74.449	169.867
Tachinidae	TAC ARC 003	Mixed Conifer	117.306	174.147
Tachinidae	TAC ARC 003	Mixed Conifer	66.47	206.234
Tachinidae	TAC ARC 003	Mixed Conifer	81.3872	166.191
Tachinidae	TAC ARC 003	Mixed Conifer	65.9172	197.111
Tachinidae	TAC ARC 003	Mixed Conifer	75.3629	210.091
Tachinidae	TAC ARC 003	Mixed Conifer	66.5989	134.591
Tachinidae	TAC ARC 003	Mixed Conifer	62.3451	220.856
Tachinidae	TAC ARC 003	Mixed Conifer	65.7438	157.219
Tachinidae	TAC ARC 003	Mixed Conifer	69.0219	201.753
Tachinidae	TAC ARC 003	Mixed Conifer	78.6396	206.509
Tachinidae	TAC ARC 003	Mixed Conifer	78.3003	177.903
Tachinidae	TAC ARC 003	Mixed Conifer	76.1747	206.512
Tachinidae	TAC ARC 003	Mixed Conifer	70.6562	158.373
Tachinidae	TAC ARC 003	Mixed Conifer	68.7136	176.762
Tachinidae	TAC ARC 003	Mixed Conifer	61.95	152.247
Tachinidae	TAC ARC 003	Mixed Conifer	63.0533	153.747
Tachinidae	TAC ARC 003	Mixed Conifer	62.4341	162.508
Tachinidae	TAC ARC 003	Mixed Conifer	73.3682	169.991
Tachinidae	TAC ARC 003	Mixed Conifer	69.8982	182.505
Tachinidae	TAC ARC 003	Mixed Conifer	81.4709	179.266
Tachinidae	TAC ARC 003	Mixed Conifer	69.0492	179.312
Tachinidae	TAC ARC 003	Mixed Conifer	74.2572	183.555
Tachinidae	TAC ARC 003	Mixed Conifer	67.9233	165.271
Tachinidae	TAC ARC 003	Mixed Conifer	68.9384	187.919
Tachinidae	TAC ARC 003	Mixed Conifer	67.6868	158.517
Tachinidae	TAC ARC 003	Mixed Conifer	67.6293	185.596
Tachinidae	TAC ARC 003	Mixed Conifer	69.7766	175.136
Tachinidae	TAC ARC 003	Mixed Conifer	72.9523	179.963
Tachinidae	TAC ARC 003	Mixed Conifer	72.0794	189.649
Tachinidae	TAC ARC 003	Mixed Conifer	74.2206	172.93
Tachinidae	TAC ARC 003	Mixed Conifer	70.2616	183.85
Tachinidae	TAC ARC 003	Mixed Conifer	69.9665	171.693
Tachinidae	TAC ARC 003	Mixed Conifer	68.4318	169.685
Tachinidae	TAC ARC 003	Mixed Conifer	67.1663	174.936
Tachinidae	TAC ARC 003	Mixed Conifer	69.4229	166.668
Tachinidae	TAC ARC 003	Mixed Conifer	68.3903	178.226
Tachinidae	TAC ARC 003	Mixed Conifer	72.6808	175.4
Tachinidae	TAC ARC 003	Mixed Conifer	70.4904	177.104
Tachinidae	TAC ARC 003	Mixed Conifer	72.986	181.109
Tachinidae	TAC ARC 003	Mixed Conifer	70.1788	172.163
Tachinidae	TAC ARC 003	Mixed Conifer	70.5442	180.724
Tachinidae	TAC ARC 003	Mixed Conifer	69.2671	169.663
Tachinidae	TAC ARC 003	Mixed Conifer	69.2428	177.949
Tachinidae	TAC ARC 003	Mixed Conifer	69.2122	172.931
Tachinidae	TAC ARC 003	Mixed Conifer	70.3512	176.29
Tachinidae	TAC ARC 003	Mixed Conifer	70.0822	178.962
Tachinidae	TAC ARC 003	Mixed Conifer	72.0763	175.893
Tachinidae	TAC ARC 003	Mixed Conifer	70.3892	179.946
Tachinidae	TAC ARC 003	Mixed Conifer	71.501	175.88
Tachinidae	TAC ARC 003	Mixed Conifer	69.8133	175.266
Tachinidae	TAC ARC 003	Mixed Conifer	69.7505	176.691
Tachinidae	TAC ARC 003	Mixed Conifer	69.7039	171.684
Tachinidae	TAC ARC 003	Mixed Conifer	69.215	177.34
Tachinidae	TAC ARC 003	Mixed Conifer	70.4338	173.588
Tachinidae	TAC ARC 003	Mixed Conifer	70.0561	176.687
Tachinidae	TAC ARC 003	Mixed Conifer	71.0538	177.616
Tachinidae	TAC ARC 003	Mixed Conifer	70.6678	174.902
Tachinidae	TAC ARC 003	Mixed Conifer	70.6669	178.667
Tachinidae	TAC ARC 003	Mixed Conifer	70.2998	173.814
Tachinidae	TAC ARC 003	Mixed Conifer	70.0045	176.83
Tachinidae	TAC ARC 003	Mixed Conifer	69.7997	174.676
Tachinidae	TAC ARC 003	Mixed Conifer	70.0673	175.207
Tachinidae	TAC ARC 003	Mixed Conifer	69.8387	176.544
Tachinidae	TAC ARC 003	Mixed Conifer	70.7137	175.401
Tachinidae	TAC ARC 003	Mixed Conifer	70.1731	177.312
Tachinidae	TAC ARC 003	Mixed Conifer	70.9686	176.356
Tachinidae	TAC ARC 003	Mixed Conifer	70.2351	176.075
Tachinidae	TAC ARC 003	Mixed Conifer	70.455	176.828
Tachinidae	TAC ARC 003	Mixed Conifer	70.0943	174.486
Tachinidae	TAC ARC 003	Mixed Conifer	69.9443	176.701
Tachinidae	TAC ARC 003	Mixed Conifer	70.1398	174.556
Tachinidae	TAC ARC 003	Mixed Conifer	70.0386	176.235
Tachinidae	TAC ARC 003	Mixed Conifer	70.349	176.074
Tachinidae	TAC ARC 003	Mixed Conifer	70.4232	175.678
Tachinidae	TAC ARC 003	Mixed Conifer	70.4037	177.074
Tachinidae	TAC ARC 003	Mixed Conifer	70.4924	175.355
Tachinidae	TAC ARC 003	Mixed Conifer	70.2405	176.561
Tachinidae	TAC ARC 003	Mixed Conifer	70.2234	175.575
Tachinidae	TAC ARC 003	Mixed Conifer	70.1616	175.553
Tachinidae	TAC ARC 003	Mixed Conifer	70.0414	176.134
Tachinidae	TAC ARC 003	Mixed Conifer	70.3206	175.358
Tachinidae	TAC ARC 003	Mixed Conifer	70.1259	176.411
Tachinidae	TAC ARC 003	Mixed Conifer	70.4965	175.973
Tachinidae	TAC ARC 003	Mixed Conifer	70.2685	176.064
Tachinidae	TAC ARC 003	Mixed Conifer	70.4343	176.488
Tachinidae	TAC ARC 003	Mixed Conifer	70.2724	175.485
Tachinidae	TAC ARC 003	Mixed Conifer	70.2269	176.424
Tachinidae	TAC ARC 003	Mixed Conifer	70.2113	175.368
Tachinidae	TAC ARC 003	Mixed Conifer	70.1601	176.056
Tachinidae	TAC ARC 003	Mixed Conifer	70.217	175.838
Tachinidae	TAC ARC 003	Mixed Conifer	70.2852	175.797
Tachinidae	TAC ARC 003	Mixed Conifer	70.2652	176.314
Tachinidae	TAC ARC 003	Mixed Conifer	70.3905	175.777
Tachinidae	TAC ARC 003	Mixed Conifer	70.2684	176.259
Tachinidae	TAC ARC 003	Ponderosa	70.3307	175.909
Tachinidae	TAC ARC 003	Ponderosa	70.2399	175.837
Tachinidae	TAC ARC 003	Ponderosa	70.2079	176.069
Tachinidae	TAC ARC 003	Ponderosa	70.2568	175.622
Tachinidae	TAC ARC 003	Ponderosa	70.1815	176.121
Tachinidae	TAC ARC 003	Ponderosa	70.3145	175.836
Tachinidae	TAC ARC 003	Ponderosa	70.2486	176.001
Tachinidae	TAC ARC 003	Ponderosa	70.3311	176.156
Tachinidae	TAC ARC 003	Ponderosa	70.2946	175.81
Tachinidae	TAC ARC 003	Ponderosa	70.2804	176.214
Tachinidae	TAC ARC 003	Ponderosa	70.2719	175.746
Tachinidae	TAC ARC 003	Ponderosa	70.2354	176.026
Tachinidae	TAC ARC 003	Ponderosa	70.2368	175.883
Tachinidae	TAC ARC 003	Ponderosa	70.2578	175.858
Tachinidae	TAC ARC 003	Ponderosa	70.2382	176.062
Tachinidae	TAC ARC 003	Ponderosa	70.3085	175.862
Tachinidae	TAC ARC 003	Ponderosa	70.2584	176.079
Tachinidae	TAC ARC 003	Ponderosa	70.313	175.967
Tachinidae	TAC ARC 003	Ponderosa	70.2652	175.931
Tachinidae	TAC ARC 003	Ponderosa	70.2676	176.041
Tachinidae	TAC ARC 003	Ponderosa	70.2632	175.814
Tachinidae	TAC ARC 003	Ponderosa	70.2348	176.032
Tachinidae	TAC ARC 003	Ponderosa	70.2704	175.864
Tachinidae	TAC ARC 003	Ponderosa	70.2494	175.967
Tachinidae	TAC ARC 003	Ponderosa	70.28	176.006
Tachinidae	TAC ARC 003	Spruce-fir	70.2795	175.903
Tachinidae	TAC ARC 003	Spruce-fir	70.275	176.07
Tachinidae	TAC ARC 003	Spruce-fir	70.2828	175.888
Tachinidae	TAC ARC 003	Spruce-fir	70.2614	176.004
Tachinidae	TAC ARC 003	Spruce-fir	70.2623	175.933
Tachinidae	TAC ARC 003	Spruce-fir	70.2613	175.911
Tachinidae	TAC ARC 003	Spruce-fir	70.2494	175.991
Tachinidae	TAC ARC 003	Spruce-fir	70.2768	175.898
Tachinidae	TAC ARC 003	Spruce-fir	70.2561	176.001
Tachinidae	TAC ARC 003	Spruce-fir	70.2859	175.956
Tachinidae	TAC ARC 003	Spruce-fir	70.2672	175.952
Tachinidae	TAC ARC 003	Spruce-fir	70.2754	176.005
Tachinidae	TAC ARC 003	Spruce-fir	70.2696	175.903
Tachinidae	TAC ARC 003	Spruce-fir	70.2594	175.999
Tachinidae	TAC ARC 003	Spruce-fir	70.2668	175.91
Tachinidae	TAC ARC 003	Spruce-fir	70.2582	175.96
Tachinidae	TAC ARC 003	Spruce-fir	70.2664	175.963
Tachinidae	TAC ARC 003	Spruce-fir	70.2699	175.931
Tachinidae	TAC ARC 003	Spruce-fir	70.2673	175.999
Tachinidae	TAC ARC 003	Spruce-fir	70.2767	175.932
Tachinidae	TAC ARC 003	Spruce-fir	70.2664	175.981
Tachinidae	TAC ARC 003	Spruce-fir	70.2705	175.953
Tachinidae	TAC ARC 003	Spruce-fir	70.2659	175.94
Tachinidae	TAC ARC 003	Spruce-fir	70.2612	175.972
Tachinidae	TAC ARC 003	Spruce-fir	70.269	175.926
Tachinidae	TAC ARC 003	Spruce-fir	70.2602	175.973
Tachinidae	TAC ARC 003	Spruce-fir	70.2727	175.949
Tachinidae	TAC ARC 003	Spruce-fir	70.266	175.955
Tachinidae	TAC ARC 003	Spruce-fir	70.2715	175.977
Tachinidae	TAC ARC 003	Spruce-fir	70.2698	175.937
Tachinidae	TAC ARC 003	Spruce-fir	70.2665	175.979
Tachinidae	TAC ARC 003	Spruce-fir	70.2684	175.937
Tachinidae	TAC ARC 003	Spruce-fir	70.2642	175.96
Tachinidae	TAC ARC 003	Spruce-fir	70.2657	175.955
Tachinidae	TAC ARC 003	Spruce-fir	70.2673	175.944
Tachinidae	TAC ARC 003	Spruce-fir	70.2654	175.971
Tachinidae	TAC ARC 003	Spruce-fir	70.2711	175.945
Tachinidae	TAC ARC 003	Spruce-fir	70.2665	175.967
Tachinidae	TAC ARC 003	Spruce-fir	70.2703	175.957
Tachinidae	TAC ARC 003	Spruce-fir	70.2674	175.951
Tachinidae	TAC ARC 003	Spruce-fir	70.2663	175.965
Tachinidae	TAC ARC 003	Spruce-fir	70.2679	175.942
Tachinidae	TAC ARC 003	Spruce-fir	70.2643	175.964
Tachinidae	TAC ARC 003	Spruce-fir	70.2685	175.95
Tachinidae	TAC ARC 003	Spruce-fir	70.266	175.955
Tachinidae	TAC ARC 003	Spruce-fir	70.2685	175.963
Tachinidae	TAC ARC 003	Spruce-fir	70.2685	175.949
Tachinidae	TAC TAC 001	Spruce-fir	46.01	241.541
Tachinidae	TAC TAC 001	Spruce-fir	77.96	348.852
Tachinidae	TAC TAC 001	Spruce-fir	68.004	155.749
Tachinidae	TAC TRI 001	Mixed Conifer	37.39	16.3122
Tachinidae	TAC TRI 001	Mixed Conifer	41.058	90.1323
Tachinidae	TACH PEL 001	Mixed Conifer	97.712	363.171
Tachinidae	TACH PEL 002	Mixed Conifer	43.663	48.3221
Tachinidae	TACH PEL 003	Mixed Conifer	83.833	138.742
Tachinidae	TACH PEL 003	Mixed Conifer	41.355	88.3045
Tachinidae	Tachina latianulum	Mixed Conifer	82.82	483.64
Tachinidae	Tachina latianulum	Mixed Conifer	82.82	483.64
Tachinidae	Tachina latianulum	Mixed Conifer	56.464	501.004
Tachinidae	Tachina latianulum	Mixed Conifer	58.272	421.683
Tachinidae	Tachina latianulum	Mixed Conifer	69.642	492.322
Tachinidae	Tachina latianulum	Mixed Conifer	57.368	461.344
Tachinidae	Tachina latianulum	Mixed Conifer	63.957	457.003
Tachinidae	Tachina latianulum	Mixed Conifer	63.505	476.833
Tachinidae	Tachina latianulum	Mixed Conifer	60.6625	459.173
Tachinidae	Tachina latianulum	Mixed Conifer	63.731	466.918
Tachinidae	Tachina latianulum	Mixed Conifer	62.0838	468.003
Tachinidae	Tachina latianulum	Mixed Conifer	62.1968	463.045
Tachinidae	Tachina latianulum	Mixed Conifer	62.9074	467.46
Tachinidae	Tachina latianulum	Mixed Conifer	62.1403	465.524
Tachinidae	Tachina latianulum	Mixed Conifer	71.113	489.691
Tachinidae	Tachina latianulum	Mixed Conifer	62.5238	466.492
Tachinidae	Tachina latianulum	Mixed Conifer	66.6266	477.608
Tachinidae	Tachina latianulum	Mixed Conifer	66.8184	478.092
Tachinidae	Tachina latianulum	Mixed Conifer	64.5752	472.05
Tachinidae	Tachina latianulum	Spruce-fir	66.7225	477.85
Tachinidae	Tachina latianulum	Spruce-fir	65.6968	475.071
Tachinidae	Tachina latianulum	Spruce-fir	65.6489	474.95
Tachinidae	Tachina latianulum	Spruce-fir	66.2097	476.46
Tachinidae	Tachina latianulum	Spruce-fir	65.6728	475.01
Tachinidae	Tachinini paradejeania	Mixed Conifer	84.451	76.1617
Tachinidae	Tachinini paradejeania	Mixed Conifer	66.687	372.959
Tachinidae	Tachinini paradejeania	Mixed Conifer	71.113	489.691
Tachinidae	Tachinini paradejeania	Mixed Conifer	63.374	414.493
Tachinidae	Tachinini paradejeania	Mixed Conifer	46.01	241.541
Tachinidae	Tachinini paradejeania	Mixed Conifer	74.0837	312.937
Tachinidae	Tachinini paradejeania	Mixed Conifer	67.058	425.714
Tachinidae	Tachinini paradejeania	Mixed Conifer	60.1657	381.908
Tachinidae	Tachinini paradejeania	Mixed Conifer	61.1559	322.99
Tachinidae	Tachinini paradejeania	Mixed Conifer	62.3839	326.731
Tachinidae	Tachinini paradejeania	Mixed Conifer	67.1024	373.52
Tachinidae	Tachinini paradejeania	Mixed Conifer	62.7932	376.871
Tachinidae	Trichopoda plumipes	Mixed Conifer	87.722	145.204
Tachinidae	Trichopoda plumipes	Mixed Conifer	63.746	222.081
Tachinidae	Trichopoda plumipes	Mixed Conifer	80.538	98.3478
Tachinidae	Trichopoda plumipes	Mixed Conifer	94.331	67.1296
Tachinidae	Trichopoda plumipes	Mixed Conifer	44.161	53.6666
Tachinidae	Xanthoepalpus bicolor	Mixed Conifer	71.895	979.424
Tachinidae	Xanthoepalpus bicolor	Mixed Conifer	71.895	979.424
Tachinidae	Xanthoepalpus bicolor	Mixed Conifer	71.888	262.378
Tachinidae	Xanthoepalpus bicolor	Mixed Conifer	73.913	485.141
Tachinidae	Xanthoepalpus bicolor	Mixed Conifer	88.297	263.61
Tachinidae	Xanthoepalpus bicolor	Mixed Conifer	75.5776	593.995
Tachinidae	Xanthoepalpus bicolor	Mixed Conifer	76.3141	516.91
Tachinidae	Xanthoepalpus bicolor	Mixed Conifer	77.1979	424.407
Tachinidae	Xanthoepalpus bicolor	Mixed Conifer	78.2599	456.813
Tachinidae	Xanthoepalpus bicolor	Mixed Conifer	79.1293	451.147
Tachinidae	Xanthoepalpus bicolor	Mixed Conifer	77.2958	488.654
Tachinidae	Xanthoepalpus bicolor	Mixed Conifer	77.6394	467.586
Tachinidae	Xanthoepalpus bicolor	Mixed Conifer	77.9045	457.721
Tachinidae	Xanthoepalpus bicolor	Mixed Conifer	78.0458	464.384
Tachinidae	Xanthoepalpus bicolor	Mixed Conifer	78.003	465.899
Tachinidae	Xanthoepalpus bicolor	Mixed Conifer	77.7777	468.849
Tachinidae	Xanthoepalpus bicolor	Mixed Conifer	77.8741	464.888
Tachinidae	Xanthoepalpus bicolor	Mixed Conifer	77.921	464.348
Tachinidae	Xanthoepalpus bicolor	Mixed Conifer	77.9243	465.674
Tachinidae	Xanthoepalpus bicolor	Mixed Conifer	77.9	465.931
Tachinidae	Xanthoepalpus bicolor	Mixed Conifer	77.8794	465.938
Tachinidae	Xanthoepalpus bicolor	Mixed Conifer	77.8998	465.356
Tachinidae	Xanthoepalpus bicolor	Mixed Conifer	77.9049	465.449
Tachinidae	Xanthoepalpus bicolor	Mixed Conifer	77.9017	465.67
Tachinidae	Xanthoepalpus bicolor	Mixed Conifer	77.8971	465.669
Tachinidae	Xanthoepalpus bicolor	Mixed Conifer	77.8966	465.616
Tephritidae	Euaresta bella	Mixed Conifer	123.036	4.54766
Tephritidae	Euaresta bella	Mixed Conifer	78.119	255.941
Andrenidae	AND ANC 001	Ponderosa	61.6469	8.96017
Andrenidae	AND ANC 001	Ponderosa	61.7137	8.98709
Andrenidae	AND PER 001	Ponderosa	62.128	9.67173
Andrenidae	Andrena crinita	Mixed Conifer	62.1648	8.9512
Andrenidae	Andrena crinita	Mixed Conifer	62.6001	8.9512
Andrenidae	Andrena crinita	Mixed Conifer	62.628	8.95123
Andrenidae	Andrena crinita	Mixed Conifer	62.6982	8.95133
Andrenidae	Andrena crinita	Mixed Conifer	63.057	8.95176
Andrenidae	Andrena crinita	Mixed Conifer	63.1892	8.95344
Andrenidae	Andrena medionitens	Mixed Conifer	63.2346	12.0487
Andrenidae	Andrena medionitens	Mixed Conifer	63.2346	13.7745
Apidae	Anthophora montana	Mixed Conifer	32.5974	210.019
Apidae	Anthophora montana	Mixed Conifer	33.735	210.082
Apidae	Anthophora montana	Mixed Conifer	33.735	210.137
Apidae	Anthophora montana	Mixed Conifer	33.735	210.193
Apidae	Anthophora montana	Mixed Conifer	34.398	210.207
Apidae	Anthophora montana	Mixed Conifer	34.582	210.215
Apidae	Anthophora montana	Mixed Conifer	35.39	210.22
Apidae	Anthophora montana	Mixed Conifer	35.9693	210.224
Apidae	Anthophora montana	Mixed Conifer	36.0888	210.226
Apidae	Anthophora montana	Mixed Conifer	36.196	210.227
Apidae	Anthophora montana	Mixed Conifer	36.4318	210.227
Apidae	Anthophora montana	Mixed Conifer	36.779	210.228
Apidae	Anthophora montana	Mixed Conifer	37.676	210.229
Apidae	Anthophora montana	Mixed Conifer	37.676	210.229
Apidae	Anthophora montana	Mixed Conifer	37.936	210.23
Apidae	Anthophora montana	Mixed Conifer	38.0975	210.231
Apidae	Anthophora montana	Mixed Conifer	38.645	210.231
Apidae	Anthophora montana	Mixed Conifer	39.3976	210.231
Apidae	Anthophora montana	Mixed Conifer	40.7008	210.232
Apidae	Anthophora montana	Mixed Conifer	40.8511	210.232
Apidae	Anthophora montana	Mixed Conifer	40.9103	210.232
Apidae	Anthophora montana	Mixed Conifer	40.996	210.233
Apidae	Anthophora montana	Mixed Conifer	41.1433	210.233
Apidae	Anthophora montana	Mixed Conifer	41.1677	210.234
Apidae	Anthophora montana	Mixed Conifer	41.1745	210.234
Apidae	Anthophora montana	Mixed Conifer	41.1767	210.234
Apidae	Anthophora montana	Mixed Conifer	41.1807	210.234
Apidae	Anthophora montana	Mixed Conifer	41.1821	210.235
Apidae	Anthophora montana	Ponderosa	21.995	202.72
Apidae	Anthophora montana	Ponderosa	21.995	202.726
Apidae	Anthophora montana	Ponderosa	21.995	202.793
Apidae	Anthophora montana	Ponderosa	24.522	203.277
Apidae	Anthophora montana	Ponderosa	27.617	203.751
Apidae	Anthophora montana	Ponderosa	27.617	203.83
Apidae	Anthophora montana	Ponderosa	29.193	204.384
Apidae	Anthophora montana	Ponderosa	29.193	204.572
Apidae	Anthophora montana	Ponderosa	29.193	204.714
Apidae	Anthophora montana	Ponderosa	30.764	204.94
Apidae	Anthophora montana	Ponderosa	30.764	205.256
Apidae	Anthophora montana	Ponderosa	30.764	205.497
Apidae	Anthophora montana	Ponderosa	30.764	205.682
Apidae	Anthophora montana	Ponderosa	31.0793	206.057
Apidae	Anthophora montana	Ponderosa	31.0793	206.618
Apidae	Anthophora montana	Ponderosa	31.0793	206.655
Apidae	Anthophora montana	Ponderosa	31.0793	207.18
Apidae	Anthophora montana	Ponderosa	31.1379	207.251
Apidae	Anthophora montana	Ponderosa	31.1379	207.633
Apidae	Anthophora montana	Ponderosa	31.1379	207.745
Apidae	Anthophora montana	Ponderosa	31.1477	208.311
Apidae	Anthophora montana	Ponderosa	31.1479	208.617
Apidae	Anthophora montana	Ponderosa	31.1484	208.878
Apidae	Anthophora montana	Ponderosa	31.1484	209.448
Apidae	Anthophora montana	Ponderosa	31.1492	209.605
Apidae	Anthophora montana	Ponderosa	31.1495	209.639
Apidae	Anthophora montana	Ponderosa	31.1495	209.639
Apidae	Anthophora montana	Ponderosa	31.1496	209.639
Apidae	Anthophora montana	Ponderosa	31.1497	209.639
Apidae	Anthophora montana	Ponderosa	31.1497	209.968
Apidae	Anthophora terminalis	Mixed Conifer	31.5923	210.246
Apidae	Anthophora terminalis	Mixed Conifer	31.849	210.247
Apidae	Anthophora terminalis	Mixed Conifer	31.849	210.247
Apidae	Anthophora terminalis	Mixed Conifer	31.849	210.247
Apidae	Anthophora terminalis	Mixed Conifer	41.1835	210.247
Apidae	Anthophora terminalis	Mixed Conifer	41.1836	210.247
Apidae	Anthophora terminalis	Mixed Conifer	41.1842	210.248
Apidae	Anthophora terminalis	Mixed Conifer	41.1843	210.248
Apidae	Anthophora terminalis	Mixed Conifer	41.1845	210.248
Apidae	Anthophora terminalis	Mixed Conifer	41.1845	210.248
Apidae	Anthophora terminalis	Mixed Conifer	41.1845	210.249
Apidae	Anthophora terminalis	Mixed Conifer	41.1848	210.25
Apidae	Anthophora terminalis	Mixed Conifer	41.1851	210.251
Apidae	Anthophora terminalis	Mixed Conifer	41.1856	210.252
Apidae	Anthophora terminalis	Mixed Conifer	41.1911	210.253
Apidae	Anthophora terminalis	Mixed Conifer	41.1954	210.253
Apidae	Anthophora terminalis	Mixed Conifer	41.2035	210.253
Apidae	Anthophora terminalis	Mixed Conifer	41.2662	210.256
Apidae	Anthophora terminalis	Mixed Conifer	41.3663	210.259
Apidae	Anthophora terminalis	Mixed Conifer	41.4361	210.263
Apidae	Anthophora terminalis	Mixed Conifer	41.6776	210.264
Apidae	Anthophora terminalis	Mixed Conifer	42.547	210.275
Apidae	Anthophora terminalis	Mixed Conifer	42.998	210.276
Apidae	Anthophora terminalis	Mixed Conifer	43.214	210.304
Apidae	Anthophora terminalis	Mixed Conifer	44.8667	210.361
Apidae	Anthophora terminalis	Mixed Conifer	45.4724	210.361
Apidae	Anthophora terminalis	Mixed Conifer	45.998	210.414
Apidae	Anthophora terminalis	Mixed Conifer	50.5821	210.497
Apidae	Anthophora terminalis	Mixed Conifer	53.9476	210.523
Apidae	Anthophora terminalis	Mixed Conifer	55.854	210.525
Apidae	Anthophora terminalis	Mixed Conifer	55.991	210.529
Apidae	Anthophora terminalis	Mixed Conifer	56.4353	210.543
Apidae	Anthophora terminalis	Mixed Conifer	56.605	210.592
Apidae	Anthophora terminalis	Mixed Conifer	56.8664	210.599
Apidae	Anthophora terminalis	Mixed Conifer	57.3191	210.602
Apidae	Anthophora terminalis	Mixed Conifer	57.461	210.624
Apidae	Anthophora terminalis	Mixed Conifer	57.9771	210.624
Apidae	Anthophora terminalis	Mixed Conifer	58.4894	211.657
Apidae	Anthophora terminalis	Ponderosa	31.1497	210.235
Apidae	Anthophora terminalis	Ponderosa	31.1497	210.235
Apidae	Anthophora terminalis	Ponderosa	31.1497	210.236
Apidae	Anthophora terminalis	Ponderosa	31.15	210.236
Apidae	Anthophora terminalis	Ponderosa	31.15	210.237
Apidae	Anthophora terminalis	Ponderosa	31.15	210.237
Apidae	Anthophora terminalis	Ponderosa	31.15	210.237
Apidae	Anthophora terminalis	Ponderosa	31.1513	210.237
Apidae	Anthophora terminalis	Ponderosa	31.1574	210.237
Apidae	Anthophora terminalis	Ponderosa	31.1574	210.238
Apidae	Anthophora terminalis	Ponderosa	31.1574	210.238
Apidae	Anthophora terminalis	Ponderosa	31.1574	210.238
Apidae	Anthophora terminalis	Ponderosa	31.1844	210.239
Apidae	Anthophora terminalis	Ponderosa	31.1844	210.239
Apidae	Anthophora terminalis	Ponderosa	31.1844	210.24
Apidae	Anthophora terminalis	Ponderosa	31.1844	210.241
Apidae	Anthophora terminalis	Ponderosa	31.1862	210.241
Apidae	Anthophora terminalis	Ponderosa	31.1862	210.241
Apidae	Anthophora terminalis	Ponderosa	31.1862	210.241
Apidae	Anthophora terminalis	Ponderosa	31.1862	210.242
Apidae	Anthophora terminalis	Ponderosa	31.2877	210.243
Apidae	Anthophora terminalis	Ponderosa	31.2877	210.243
Apidae	Anthophora terminalis	Ponderosa	31.2877	210.243
Apidae	Anthophora terminalis	Ponderosa	31.2877	210.243
Apidae	Anthophora terminalis	Ponderosa	31.5068	210.243
Apidae	Anthophora terminalis	Ponderosa	31.5068	210.244
Apidae	Anthophora terminalis	Ponderosa	31.5068	210.245
Apidae	Anthophora terminalis	Ponderosa	31.5923	210.245
Apidae	Anthophora terminalis	Ponderosa	31.5923	210.246
Apidae	Anthophora terminalis	Spruce-fir	58.5053	211.663
Apidae	Anthophora terminalis	Spruce-fir	58.5053	211.669
Apidae	Anthophora terminalis	Spruce-fir	59.6969	211.677
Apidae	Anthophora terminalis	Spruce-fir	59.7837	211.684
Apidae	Anthophora terminalis	Spruce-fir	60.177	211.691
Apidae	Anthophora terminalis	Spruce-fir	60.628	211.699
Apidae	Anthophora terminalis	Spruce-fir	60.892	211.706
Apidae	Anthophora terminalis	Spruce-fir	60.9046	211.714
Apidae	Anthophora terminalis	Spruce-fir	61.542	211.721
Apidae	Anthophora terminalis	Spruce-fir	61.5946	574.25
Apidae	Anthophora urbana	Mixed Conifer	64.3378	574.342
Apidae	Anthophora urbana	Mixed Conifer	64.341	574.475
Apidae	Anthophora urbana	Ponderosa	63.7474	225.033
Apidae	Anthophora urbana	Ponderosa	63.9731	225.304
Apidae	Anthophora ursina	Ponderosa	61.628	225.415
Apidae	API EUCE 001	Ponderosa	65.3315	585.898
Apidae	API EUCE 002	Mixed Conifer	64.544	730.128
Apidae	API EUCE 002	Mixed Conifer	64.544	729.622
Apidae	API EUCE 002	Mixed Conifer	64.5647	728.743
Apidae	API EUCE 002	Mixed Conifer	64.628	714.957
Apidae	API EUCE 002	Mixed Conifer	64.628	714.929
Apidae	API EUCE 002	Mixed Conifer	64.628	714.713
Apidae	API EUCE 002	Mixed Conifer	65.4484	713.655
Apidae	API EUCE 002	Mixed Conifer	65.5289	712.81
Apidae	API EUCE 002	Spruce-fir	66.8667	733.854
Apidae	API EUCE 002	Spruce-fir	66.8347	734.322
Apidae	API EUCE 003	Spruce-fir	67.2094	732.781
Apidae	API EUCE 003	Spruce-fir	67.0216	733.446
Apidae	API EUCE 004	Spruce-fir	67.3982	731.929
Apidae	API MELI 003	Mixed Conifer	67.588	712.601
Apidae	API MELI 003	Mixed Conifer	67.7788	712.492
Apidae	API MELI 003	Mixed Conifer	67.9706	711.958
Apidae	API MELI 003	Mixed Conifer	68.1634	711.705
Apidae	API MELI 003	Mixed Conifer	68.2225	711.62
Apidae	API MELI 003	Mixed Conifer	68.336	711.541
Apidae	API MELI 003	Mixed Conifer	68.3572	710.438
Apidae	API MELI 003	Mixed Conifer	68.552	708.201
Apidae	API MELI 003	Ponderosa	67.6107	584.605
Apidae	API MELI 003	Ponderosa	66.0942	584.619
Apidae	API MELI 003	Ponderosa	65.9103	584.713
Apidae	API MELI 003	Ponderosa	65.7499	584.999
Apidae	API MELI 003	Ponderosa	65.7191	585.871
Apidae	API MELI 003	Ponderosa	65.548	585.878
Apidae	API TET 001	Mixed Conifer	68.651	705.977
Apidae	API TET 001	Mixed Conifer	68.6782	705.971
Apidae	API TET 001	Mixed Conifer	68.7479	705.738
Apidae	API TET 001	Mixed Conifer	68.8493	704.819
Apidae	Apis mellifera	Mixed Conifer	68.9448	583.462
Apidae	Apis mellifera	Mixed Conifer	69.0055	584.557
Apidae	ARP TRI 001	Mixed Conifer	71.5975	703.576
Apidae	ARP TRI 001	Mixed Conifer	71.6196	703.54
Apidae	Bombus appositus	Mixed Conifer	75.686	734.601
Apidae	Bombus appositus	Mixed Conifer	75.7283	740.097
Apidae	Bombus appositus	Mixed Conifer	75.8323	740.525
Apidae	Bombus appositus	Mixed Conifer	75.8666	740.57
Apidae	Bombus appositus	Mixed Conifer	75.9367	740.771
Apidae	Bombus appositus	Mixed Conifer	75.9575	740.807
Apidae	Bombus appositus	Mixed Conifer	76.0414	740.831
Apidae	Bombus appositus	Mixed Conifer	76.0482	741.044
Apidae	Bombus appositus	Mixed Conifer	76.1464	741.108
Apidae	Bombus appositus	Mixed Conifer	76.2308	741.119
Apidae	Bombus appositus	Spruce-fir	76.3573	1011.37
Apidae	Bombus appositus	Spruce-fir	76.2517	1012.11
Apidae	Bombus bifarius	Mixed Conifer	84.1715	741.666
Apidae	Bombus bifarius	Mixed Conifer	84.2829	741.741
Apidae	Bombus bifarius	Mixed Conifer	84.3211	742.153
Apidae	Bombus bifarius	Mixed Conifer	84.467	742.366
Apidae	Bombus centralis	Mixed Conifer	84.5723	742.531
Apidae	Bombus centralis	Mixed Conifer	84.6059	742.785
Apidae	Bombus centralis	Mixed Conifer	84.6469	743.456
Apidae	Bombus centralis	Mixed Conifer	84.6883	743.5
Apidae	Bombus centralis	Mixed Conifer	84.7349	743.621
Apidae	Bombus centralis	Mixed Conifer	84.8624	743.628
Apidae	Bombus centralis	Mixed Conifer	84.8757	744.439
Apidae	Bombus centralis	Mixed Conifer	84.9737	744.894
Apidae	Bombus centralis	Mixed Conifer	85.0744	745.085
Apidae	Bombus centralis	Mixed Conifer	85.1688	745.198
Apidae	Bombus centralis	Spruce-fir	91.4556	993.136
Apidae	Bombus centralis	Spruce-fir	91.4197	994.341
Apidae	Bombus centralis	Spruce-fir	91.399	996.368
Apidae	Bombus centralis	Spruce-fir	91.3833	997.486
Apidae	Bombus centralis	Spruce-fir	91.3468	998.741
Apidae	Bombus centralis	Spruce-fir	91.3444	1001.43
Apidae	Bombus centralis	Spruce-fir	91.3414	1002.89
Apidae	Bombus centralis	Spruce-fir	91.31	1003.95
Apidae	Bombus centralis	Spruce-fir	85.1693	1005.24
Apidae	Bombus centralis	Spruce-fir	91.4564	1010.54
Apidae	Bombus fervidus	Mixed Conifer	91.5258	963.769
Apidae	Bombus fervidus	Mixed Conifer	91.5253	1006.37
Apidae	Bombus fervidus	Mixed Conifer	91.5136	1007.64
Apidae	Bombus fervidus	Mixed Conifer	91.4907	1009.97
Apidae	Bombus huntii	Mixed Conifer	78.08	745.24
Apidae	Bombus huntii	Mixed Conifer	77.9746	747.848
Apidae	Bombus huntii	Mixed Conifer	77.9466	750.263
Apidae	Bombus huntii	Mixed Conifer	77.9173	754.59
Apidae	Bombus huntii	Mixed Conifer	77.8683	758.206
Apidae	Bombus huntii	Mixed Conifer	77.8376	758.435
Apidae	Bombus huntii	Mixed Conifer	77.7588	769.023
Apidae	Bombus huntii	Mixed Conifer	77.7261	779.496
Apidae	Bombus huntii	Mixed Conifer	77.726	782.03
Apidae	Bombus huntii	Mixed Conifer	77.6496	782.922
Apidae	Bombus huntii	Mixed Conifer	77.5403	789.82
Apidae	Bombus huntii	Mixed Conifer	77.5357	794.615
Apidae	Bombus huntii	Mixed Conifer	77.4502	800.988
Apidae	Bombus huntii	Mixed Conifer	77.4312	818.778
Apidae	Bombus huntii	Mixed Conifer	77.384	825.224
Apidae	Bombus huntii	Mixed Conifer	77.3463	828.726
Apidae	Bombus huntii	Mixed Conifer	77.3224	828.827
Apidae	Bombus huntii	Mixed Conifer	77.3139	850.747
Apidae	Bombus huntii	Mixed Conifer	77.2139	858.932
Apidae	Bombus huntii	Mixed Conifer	77.158	875.31
Apidae	Bombus huntii	Mixed Conifer	77.1057	892.178
Apidae	Bombus huntii	Mixed Conifer	76.9978	902.462
Apidae	Bombus huntii	Mixed Conifer	76.9706	918.103
Apidae	Bombus huntii	Mixed Conifer	76.8903	922.569
Apidae	Bombus huntii	Mixed Conifer	76.7842	926.131
Apidae	Bombus huntii	Mixed Conifer	76.783	932.359
Apidae	Bombus huntii	Mixed Conifer	76.6761	942.59
Apidae	Bombus huntii	Mixed Conifer	76.612	943.162
Apidae	Bombus huntii	Mixed Conifer	76.5988	944.479
Apidae	Bombus huntii	Mixed Conifer	76.5695	948.547
Apidae	Bombus huntii	Mixed Conifer	76.4633	952.251
Apidae	Bombus huntii	Mixed Conifer	76.4143	956.158
Apidae	Bombus huntii	Mixed Conifer	76.4045	956.234
Apidae	Bombus huntii	Mixed Conifer	76.4045	957.464
Apidae	Bombus huntii	Ponderosa	66.4635	720.353
Apidae	Bombus huntii	Ponderosa	66.2792	720.937
Apidae	Bombus huntii	Ponderosa	66.1387	723.213
Apidae	Bombus huntii	Ponderosa	66.1369	723.48
Apidae	Bombus huntii	Spruce-fir	80.1492	986.083
Apidae	Bombus huntii	Spruce-fir	80.1303	986.201
Apidae	Bombus huntii	Spruce-fir	80.1281	986.308
Apidae	Bombus huntii	Spruce-fir	80.1274	1787.14
Apidae	Bombus huntii	Spruce-fir	80.0904	1989.39
Apidae	Bombus huntii	Spruce-fir	80.0819	1991.84
Apidae	Bombus huntii	Spruce-fir	80.0583	2992.08
Apidae	Bombus huntii	Spruce-fir	80.05	1993.05
Apidae	Bombus melanopygus	Mixed Conifer	74.2498	978.991
Apidae	Bombus melanopygus	Mixed Conifer	74.1224	980.061
Apidae	Bombus melanopygus	Mixed Conifer	74.0954	982.56
Apidae	Bombus melanopygus	Mixed Conifer	74.0952	984.098
Apidae	Bombus morrisoni	Mixed Conifer	74.3005	976.971
Apidae	Bombus morrisoni	Mixed Conifer	74.2698	978.412
Apidae	Bombus nevadensis	Mixed Conifer	80.0342	736.06
Apidae	Bombus nevadensis	Mixed Conifer	80.0095	736.655
Apidae	Bombus nevadensis	Mixed Conifer	80.0094	737.059
Apidae	Bombus nevadensis	Mixed Conifer	79.9842	737.2
Apidae	Bombus nevadensis	Mixed Conifer	79.9724	737.242
Apidae	Bombus nevadensis	Mixed Conifer	79.9685	738.402
Apidae	Bombus nevadensis	Ponderosa	64.9566	738.768
Apidae	Bombus nevadensis	Ponderosa	64.9246	738.912
Apidae	Bombus nevadensis	Ponderosa	64.811	739.189
Apidae	Bombus nevadensis	Ponderosa	64.811	739.336
Apidae	Bombus nevadensis	Ponderosa	64.7025	739.598
Apidae	Bombus nevadensis	Ponderosa	66.6487	739.728
Apidae	Bombus nevadensis	Spruce-fir	80.0392	735.362
Apidae	Bombus nevadensis	Spruce-fir	80.037	735.938
Apidae	Bombus occidentalis	Mixed Conifer	64.9725	716.468
Apidae	Bombus occidentalis	Mixed Conifer	58.8751	716.94
Apidae	Bombus occidentalis	Mixed Conifer	52.855	718.784
Apidae	Bombus occidentalis	Mixed Conifer	74.855	719.859
Apidae	Bombus occidentalis	Mixed Conifer	54.7964	724.252
Apidae	Bombus occidentalis	Mixed Conifer	64.7515	725.075
Apidae	Bombus occidentalis	Mixed Conifer	74.6284	725.497
Apidae	Bombus occidentalis	Mixed Conifer	54.6203	726.004
Apidae	Bombus occidentalis	Mixed Conifer	58.5148	726.098
Apidae	Bombus occidentalis	Mixed Conifer	74.5056	726.453
Apidae	Bombus occidentalis	Mixed Conifer	71.3447	726.915
Apidae	Bombus occidentalis	Mixed Conifer	73.9947	735.32
Apidae	Bombus occidentalis	Spruce-fir	75.2101	973.795
Apidae	Bombus occidentalis	Spruce-fir	75.1495	974.096
Apidae	Bombus occidentalis	Spruce-fir	75.1065	974.361
Apidae	Bombus occidentalis	Spruce-fir	74.997	975.203
Apidae	Diadasia australis	Mixed Conifer	87.9655	10.0679
Apidae	Diadasia australis	Mixed Conifer	87.9669	10.4641
Apidae	Diadasia australis	Mixed Conifer	87.967	11.5429
Apidae	Diadasia australis	Mixed Conifer	87.9691	13.7745
Apidae	Diadasia australis	Ponderosa	70.076	9.86982
Apidae	Diadasia australis	Spruce-fir	87.9756	113.774
Apidae	Diadasia australis	Spruce-fir	87.9772	117.386
Apidae	Diadasia diminuta	Mixed Conifer	97.3025	119.583
Apidae	Diadasia diminuta	Mixed Conifer	97.4414	119.583
Apidae	Diadasia diminuta	Ponderosa	91.5598	117.386
Apidae	Diadasia diminuta	Ponderosa	91.5653	117.918
Apidae	Diadasia diminuta	Ponderosa	91.5707	118.564
Apidae	Diadasia diminuta	Ponderosa	91.5937	118.564
Apidae	Diadasia diminuta	Ponderosa	91.6145	118.564
Apidae	Diadasia diminuta	Ponderosa	93.2575	118.734
Apidae	Diadasia diminuta	Ponderosa	93.2603	118.815
Apidae	Diadasia diminuta	Ponderosa	93.2617	118.874
Apidae	Diadasia diminuta	Ponderosa	93.264	118.891
Apidae	Diadasia diminuta	Ponderosa	93.2647	118.984
Apidae	Diadasia diminuta	Ponderosa	93.2674	119.201
Apidae	Diadasia diminuta	Ponderosa	93.2678	119.201
Apidae	Diadasia diminuta	Spruce-fir	97.6095	119.583
Apidae	Diadasia diminuta	Spruce-fir	97.6303	119.583
Apidae	Diadasia rinconis	Mixed Conifer	100.043	211.621
Apidae	Diadasia rinconis	Mixed Conifer	101.312	211.626
Apidae	Diadasia rinconis	Mixed Conifer	101.312	211.632
Apidae	Diadasia rinconis	Mixed Conifer	101.312	211.637
Apidae	Diadasia rinconis	Mixed Conifer	107.183	211.643
Apidae	Diadasia rinconis	Mixed Conifer	107.183	211.65
Apidae	Diadasia rinconis	Ponderosa	98	210.679
Apidae	Diadasia rinconis	Ponderosa	98	210.699
Apidae	Diadasia rinconis	Ponderosa	98.0001	210.718
Apidae	Diadasia rinconis	Ponderosa	98.0003	210.821
Apidae	Diadasia rinconis	Ponderosa	98.0014	210.821
Apidae	Diadasia rinconis	Ponderosa	98.0054	210.91
Apidae	Diadasia rinconis	Ponderosa	98.0218	211.166
Apidae	Diadasia rinconis	Ponderosa	98.0515	211.205
Apidae	Diadasia rinconis	Ponderosa	98.0872	211.412
Apidae	Diadasia rinconis	Ponderosa	98.1017	211.412
Apidae	Diadasia rinconis	Ponderosa	98.3487	211.412
Apidae	Diadasia rinconis	Ponderosa	98.571	211.412
Apidae	Diadasia rinconis	Ponderosa	98.683	211.412
Apidae	Diadasia rinconis	Ponderosa	98.683	211.597
Apidae	Diadasia rinconis	Ponderosa	98.8149	211.6
Apidae	Diadasia rinconis	Ponderosa	98.9871	211.601
Apidae	Diadasia rinconis	Ponderosa	99.0873	211.602
Apidae	Diadasia rinconis	Ponderosa	99.1261	211.604
Apidae	Diadasia rinconis	Ponderosa	99.2456	211.606
Apidae	Diadasia rinconis	Ponderosa	99.395	211.61
Apidae	Diadasia rinconis	Ponderosa	99.5784	211.615
Apidae	Melissodes confusus	Ponderosa	87.8565	600.094
Apidae	Melissodes gilensis	Mixed Conifer	95.2981	632.382
Apidae	Melissodes gilensis	Mixed Conifer	95.3082	630.4
Apidae	Melissodes gilensis	Mixed Conifer	95.3258	628.424
Apidae	Melissodes gilensis	Mixed Conifer	95.3446	626.777
Apidae	Melissodes gilensis	Ponderosa	87.8822	587.325
Apidae	Melissodes gilensis	Ponderosa	87.881	587.438
Apidae	Melissodes gilensis	Ponderosa	87.8803	587.862
Apidae	Melissodes gilensis	Ponderosa	87.8768	588.089
Apidae	Melissodes gilensis	Ponderosa	87.8725	588.746
Apidae	Melissodes gilensis	Ponderosa	87.8702	588.894
Apidae	Melissodes gilensis	Ponderosa	87.8654	589.077
Apidae	Melissodes gilensis	Ponderosa	87.8625	599.216
Apidae	Melissodes gilensis	Ponderosa	87.8587	599.479
Apidae	Melissodes glenwoodensis	Ponderosa	87.8869	345.748
Apidae	Melissodes glenwoodensis	Ponderosa	87.8856	585.927
Apidae	Melissodes glenwoodensis	Ponderosa	87.8852	586.541
Apidae	Melissodes glenwoodensis	Ponderosa	87.8849	587.206
Apidae	Melissodes glenwoodensis	Ponderosa	87.8825	587.248
Apidae	Melissodes rivalis	Ponderosa	87.8967	333.253
Apidae	Melissodes rivalis	Ponderosa	87.8932	335.041
Apidae	Melissodes rivalis	Ponderosa	87.8894	336.495
Apidae	Melissodes rivalis	Ponderosa	87.8873	343.735
Apidae	Melissodes tristis	Mixed Conifer	95.374	327.739
Apidae	Melissodes tristis	Mixed Conifer	95.3529	330.149
Colletidae	COL COL 001	Spruce-fir	74.3775	226.668
Colletidae	COL COL 001	Spruce-fir	73.971	226.86
Colletidae	COL COL 002	Mixed Conifer	70.0283	227.349
Colletidae	COL COL 002	Mixed Conifer	70.0651	227.419
Colletidae	COL COL 002	Mixed Conifer	73.9099	589.641
Colletidae	COL COL 002	Mixed Conifer	73.9108	590.382
Colletidae	COL COL 002	Ponderosa	69.996	226.939
Colletidae	COL COL 002	Ponderosa	69.996	227.197
Colletidae	COL COL 002	Spruce-fir	73.9193	590.597
Colletidae	COL COL 002	Spruce-fir	73.922	591.199
Colletidae	Colletes kincaidii	Mixed Conifer	78.1096	594.329
Colletidae	Colletes kincaidii	Mixed Conifer	78.185	595.902
Colletidae	Colletes kincaidii	Mixed Conifer	78.282	597.48
Colletidae	Colletes kincaidii	Mixed Conifer	78.299	597.73
Colletidae	Colletes kincaidii	Mixed Conifer	78.3028	597.96
Colletidae	Colletes kincaidii	Mixed Conifer	78.3473	599.062
Colletidae	Colletes kincaidii	Ponderosa	69.9446	592.335
Colletidae	Colletes kincaidii	Ponderosa	70.251	592.761
Colletidae	Hylaeus annulatus	Mixed Conifer	92.0204	696.535
Colletidae	Hylaeus annulatus	Mixed Conifer	92.0264	694.821
Colletidae	Hylaeus annulatus	Ponderosa	79.1437	620.584
Colletidae	Hylaeus rudbeckiae	Spruce-fir	97.1462	221.844
Colletidae	Hylaeus rudbeckiae	Spruce-fir	97.7982	222.009
Halictidae	Agapostemon texanus	Mixed Conifer	69.4316	21.3538
Halictidae	Agapostemon texanus	Mixed Conifer	69.4533	25.1552
Halictidae	Agapostemon texanus	Mixed Conifer	75.3274	26.5427
Halictidae	Agapostemon texanus	Mixed Conifer	75.4172	28.6292
Halictidae	Agapostemon texanus	Mixed Conifer	75.425	28.6292
Halictidae	Agapostemon texanus	Mixed Conifer	75.5063	28.7165
Halictidae	Agapostemon texanus	Mixed Conifer	75.5209	37.578
Halictidae	Agapostemon texanus	Mixed Conifer	75.5251	37.578
Halictidae	Agapostemon texanus	Ponderosa	69.1057	17.9623
Halictidae	Agapostemon texanus	Ponderosa	69.1426	17.9623
Halictidae	Agapostemon texanus	Ponderosa	69.1471	18.3361
Halictidae	Agapostemon texanus	Ponderosa	69.2891	18.4231
Halictidae	Agapostemon texanus	Ponderosa	69.3416	19.4061
Halictidae	Agapostemon texanus	Ponderosa	69.376	21.3538
Halictidae	Agapostemon texanus	Spruce-fir	75.5827	42.93
Halictidae	Agapostemon texanus	Spruce-fir	75.6245	54.6248
Halictidae	Agapostemon texanus	Spruce-fir	80.0932	62.8894
Halictidae	Agapostemon texanus	Spruce-fir	80.1049	73.4076
Halictidae	HAL HAL 001	Spruce-fir	108.65	575.272
Halictidae	HAL LAS 006	Mixed Conifer	108.65	575.436
Halictidae	HAL LAS 006	Mixed Conifer	108.834	575.849
Halictidae	HAL LAS 007	Mixed Conifer	109.017	576.395
Halictidae	HAL LAS 007	Mixed Conifer	109.017	576.499
Halictidae	HAL LAS 008	Mixed Conifer	109.109	576.638
Halictidae	HAL LAS 008	Mixed Conifer	109.109	577.362
Halictidae	HAL LAS 008	Ponderosa	109.063	577.733
Halictidae	HAL LAS 008	Ponderosa	109.092	578.879
Halictidae	HAL LAS DIA 001	Spruce-fir	85.1832	580.402
Halictidae	HAL LAS DIA 001	Spruce-fir	85.2017	581.409
Halictidae	HAL LAS DIA 002	Spruce-fir	85.3289	211.752
Halictidae	HAL LAS DIA 002	Spruce-fir	85.2714	211.76
Halictidae	HAL LAS DIA 002	Spruce-fir	85.264	211.768
Halictidae	HAL LAS DIA 002	Spruce-fir	85.2017	581.929
Halictidae	HAL LAS DIA 003	Spruce-fir	85.3794	211.742
Halictidae	HAL LAS DIA 003	Spruce-fir	85.3576	211.745
Halictidae	HAL LAS DIA 005	Ponderosa	70.129	211.729
Halictidae	HAL LAS DIA 005	Ponderosa	70.105	211.737
Halictidae	HAL LAS DIA 010	Mixed Conifer	87.9509	219.26
Halictidae	HAL LAS DIA 010	Mixed Conifer	87.9501	219.37
Halictidae	HAL LAS DIA 010	Mixed Conifer	87.9496	219.657
Halictidae	HAL LAS DIA 010	Mixed Conifer	87.9469	219.761
Halictidae	HAL LAS DIA 010	Mixed Conifer	87.9466	219.797
Halictidae	HAL LAS DIA 010	Mixed Conifer	87.9463	220.224
Halictidae	HAL LAS DIA 010	Mixed Conifer	87.9452	220.519
Halictidae	HAL LAS DIA 010	Mixed Conifer	87.9421	220.685
Halictidae	HAL LAS DIA 010	Mixed Conifer	87.9404	220.778
Halictidae	HAL LAS DIA 010	Mixed Conifer	87.9367	220.8
Halictidae	HAL LAS DIA 010	Mixed Conifer	87.9366	221.037
Halictidae	HAL LAS DIA 010	Mixed Conifer	87.9366	221.137
Halictidae	HAL LAS DIA 010	Mixed Conifer	87.9352	221.182
Halictidae	HAL LAS DIA 010	Mixed Conifer	87.9352	221.211
Halictidae	HAL LAS DIA 010	Mixed Conifer	87.9333	221.303
Halictidae	HAL LAS DIA 010	Mixed Conifer	87.9329	221.565
Halictidae	HAL LAS DIA 010	Mixed Conifer	87.9298	221.83
Halictidae	HAL LAS DIA 010	Mixed Conifer	87.9273	222.887
Halictidae	HAL LAS DIA 010	Mixed Conifer	87.9246	222.894
Halictidae	HAL LAS DIA 010	Mixed Conifer	87.9237	223.044
Halictidae	HAL LAS DIA 010	Mixed Conifer	87.9232	223.136
Halictidae	HAL LAS DIA 010	Mixed Conifer	87.9184	223.152
Halictidae	HAL LAS DIA 010	Mixed Conifer	87.9159	223.418
Halictidae	HAL LAS DIA 010	Mixed Conifer	87.9158	223.651
Halictidae	HAL LAS DIA 010	Mixed Conifer	87.9149	223.685
Halictidae	HAL LAS DIA 010	Mixed Conifer	87.9128	223.713
Halictidae	HAL LAS DIA 010	Mixed Conifer	87.9086	223.953
Halictidae	HAL LAS DIA 010	Mixed Conifer	87.9082	224.118
Halictidae	HAL LAS DIA 010	Mixed Conifer	87.9062	224.222
Halictidae	HAL LAS DIA 010	Mixed Conifer	87.9049	224.412
Halictidae	HAL LAS DIA 010	Mixed Conifer	87.9044	224.491
Halictidae	HAL LAS DIA 010	Mixed Conifer	87.9025	224.553
Halictidae	HAL LAS DIA 010	Mixed Conifer	87.8984	224.762
Halictidae	HAL LAS DIA 010	Mixed Conifer	85.4386	224.944
Halictidae	HAL LAS DIA 010	Ponderosa	73.0838	215.642
Halictidae	HAL LAS DIA 010	Ponderosa	73.0707	215.708
Halictidae	HAL LAS DIA 010	Ponderosa	72.9835	215.773
Halictidae	HAL LAS DIA 010	Ponderosa	72.9807	215.822
Halictidae	HAL LAS DIA 010	Ponderosa	72.9772	215.834
Halictidae	HAL LAS DIA 010	Ponderosa	72.9181	215.893
Halictidae	HAL LAS DIA 010	Ponderosa	72.869	215.95
Halictidae	HAL LAS DIA 010	Ponderosa	72.8552	215.952
Halictidae	HAL LAS DIA 010	Ponderosa	72.73	215.979
Halictidae	HAL LAS DIA 010	Ponderosa	72.7288	216.003
Halictidae	HAL LAS DIA 010	Ponderosa	72.6554	216.004
Halictidae	HAL LAS DIA 010	Ponderosa	72.6051	216.052
Halictidae	HAL LAS DIA 010	Ponderosa	71.4981	216.098
Halictidae	HAL LAS DIA 010	Ponderosa	71.3875	216.14
Halictidae	HAL LAS DIA 010	Ponderosa	71.3769	216.181
Halictidae	HAL LAS DIA 010	Ponderosa	71.3143	216.218
Halictidae	HAL LAS DIA 010	Ponderosa	71.2561	216.253
Halictidae	HAL LAS DIA 010	Ponderosa	71.1787	216.336
Halictidae	HAL LAS DIA 010	Ponderosa	71.1357	216.41
Halictidae	HAL LAS DIA 010	Ponderosa	71.0156	216.428
Halictidae	HAL LAS DIA 010	Ponderosa	70.8959	216.579
Halictidae	HAL LAS DIA 010	Ponderosa	70.9703	216.579
Halictidae	HAL LAS DIA 010	Ponderosa	70.7765	216.664
Halictidae	HAL LAS DIA 010	Ponderosa	70.776	216.727
Halictidae	HAL LAS DIA 010	Ponderosa	70.7631	216.877
Halictidae	HAL LAS DIA 010	Ponderosa	70.7395	217
Halictidae	HAL LAS DIA 010	Ponderosa	70.6575	217.591
Halictidae	HAL LAS DIA 010	Ponderosa	70.5924	217.611
Halictidae	HAL LAS DIA 010	Ponderosa	70.557	217.691
Halictidae	HAL LAS DIA 010	Ponderosa	70.5388	218.124
Halictidae	HAL LAS DIA 010	Ponderosa	70.426	218.183
Halictidae	HAL LAS DIA 010	Ponderosa	70.4203	218.326
Halictidae	HAL LAS DIA 010	Ponderosa	70.3519	218.342
Halictidae	HAL LAS DIA 010	Ponderosa	70.3022	218.636
Halictidae	HAL LAS DIA 010	Ponderosa	78.383	218.723
Halictidae	HAL LAS DIA 010	Ponderosa	70.1834	218.762
Halictidae	HAL LAS DIA 010	Ponderosa	70.1626	218.775
Halictidae	HAL LAS DIA 010	Ponderosa	70.1477	219.146
Halictidae	HAL LAS DIA 010	Spruce-fir	95.4595	215.501
Halictidae	HAL LAS DIA 010	Spruce-fir	95.45	215.513
Halictidae	HAL LAS DIA 010	Spruce-fir	95.4474	215.572
Halictidae	HAL LAS DIA 010	Spruce-fir	95.4332	215.641
Halictidae	HAL LAS DIA 011	Mixed Conifer	87.952	215.426
Halictidae	HAL LAS DIA 011	Ponderosa	78.5003	213.129
Halictidae	HAL LAS DIA 011	Ponderosa	78.4967	213.152
Halictidae	HAL LAS DIA 011	Ponderosa	78.4511	213.196
Halictidae	HAL LAS DIA 011	Ponderosa	78.4006	213.212
Halictidae	HAL LAS DIA 011	Ponderosa	73.8674	213.248
Halictidae	HAL LAS DIA 011	Ponderosa	73.705	213.248
Halictidae	HAL LAS DIA 011	Ponderosa	73.7402	213.248
Halictidae	HAL LAS DIA 011	Ponderosa	73.6133	213.261
Halictidae	HAL LAS DIA 011	Ponderosa	73.4968	213.271
Halictidae	HAL LAS DIA 011	Ponderosa	73.4862	213.314
Halictidae	HAL LAS DIA 011	Ponderosa	73.431	213.324
Halictidae	HAL LAS DIA 011	Ponderosa	73.3595	213.328
Halictidae	HAL LAS DIA 011	Ponderosa	73.3469	213.365
Halictidae	HAL LAS DIA 011	Ponderosa	73.296	213.384
Halictidae	HAL LAS DIA 011	Ponderosa	73.296	213.386
Halictidae	HAL LAS DIA 011	Ponderosa	73.2897	213.414
Halictidae	HAL LAS DIA 011	Ponderosa	73.2705	213.435
Halictidae	HAL LAS DIA 011	Ponderosa	73.2329	215.234
Halictidae	HAL LAS DIA 011	Ponderosa	73.2119	215.271
Halictidae	HAL LAS DIA 011	Ponderosa	73.1066	215.35
Halictidae	HAL LAS DIA 011	Spruce-fir	95.5164	212.785
Halictidae	HAL LAS DIA 011	Spruce-fir	95.51	212.788
Halictidae	HAL LAS DIA 011	Spruce-fir	95.5069	212.791
Halictidae	HAL LAS DIA 011	Spruce-fir	95.5068	212.794
Halictidae	HAL LAS DIA 011	Spruce-fir	95.5067	212.797
Halictidae	HAL LAS DIA 011	Spruce-fir	95.5063	212.849
Halictidae	HAL LAS DIA 011	Spruce-fir	95.5047	212.852
Halictidae	HAL LAS DIA 011	Spruce-fir	95.5018	212.855
Halictidae	HAL LAS DIA 011	Spruce-fir	95.4979	212.858
Halictidae	HAL LAS DIA 011	Spruce-fir	95.494	212.861
Halictidae	HAL LAS DIA 011	Spruce-fir	95.49	212.9
Halictidae	HAL LAS DIA 011	Spruce-fir	95.4847	212.917
Halictidae	HAL LAS DIA 011	Spruce-fir	95.4821	212.92
Halictidae	HAL LAS DIA 011	Spruce-fir	95.4779	212.923
Halictidae	HAL LAS DIA 011	Spruce-fir	95.4695	212.99
Halictidae	HAL LAS DIA 011	Spruce-fir	95.465	213.06
Halictidae	HAL LAS DIA 012	Mixed Conifer	87.9551	212.731
Halictidae	HAL LAS DIA 012	Ponderosa	78.5948	212.725
Halictidae	HAL LAS DIA 012	Ponderosa	78.5481	212.728
Halictidae	HAL LAS DIA 016	Mixed Conifer	87.9582	212.723
Halictidae	HAL LAS DIA 017	Spruce-fir	95.6365	212.72
Halictidae	HAL LAS DIA 017	Spruce-fir	95.5229	212.721
Halictidae	HAL LAS DIA 018	Mixed Conifer	91.7407	212.609
Halictidae	HAL LAS DIA 018	Mixed Conifer	91.7271	212.612
Halictidae	HAL LAS DIA 018	Mixed Conifer	91.7138	212.614
Halictidae	HAL LAS DIA 018	Mixed Conifer	91.694	212.635
Halictidae	HAL LAS DIA 018	Mixed Conifer	91.6842	212.637
Halictidae	HAL LAS DIA 018	Mixed Conifer	91.664	212.64
Halictidae	HAL LAS DIA 018	Mixed Conifer	91.6609	212.642
Halictidae	HAL LAS DIA 018	Mixed Conifer	91.6276	212.678
Halictidae	HAL LAS DIA 018	Mixed Conifer	91.6275	212.68
Halictidae	HAL LAS DIA 018	Mixed Conifer	87.9636	212.683
Halictidae	HAL LAS DIA 018	Mixed Conifer	87.9618	212.686
Halictidae	HAL LAS DIA 018	Mixed Conifer	87.9611	212.689
Halictidae	HAL LAS DIA 018	Ponderosa	79.0518	211.858
Halictidae	HAL LAS DIA 018	Ponderosa	79.0483	211.867
Halictidae	HAL LAS DIA 018	Ponderosa	79.0094	211.875
Halictidae	HAL LAS DIA 018	Ponderosa	79.0055	211.884
Halictidae	HAL LAS DIA 018	Ponderosa	78.9701	211.892
Halictidae	HAL LAS DIA 018	Ponderosa	78.9589	211.901
Halictidae	HAL LAS DIA 018	Ponderosa	78.9303	211.909
Halictidae	HAL LAS DIA 018	Ponderosa	78.912	211.918
Halictidae	HAL LAS DIA 018	Ponderosa	78.8901	211.927
Halictidae	HAL LAS DIA 018	Ponderosa	78.8862	212.32
Halictidae	HAL LAS DIA 018	Ponderosa	78.8649	212.422
Halictidae	HAL LAS DIA 018	Ponderosa	78.8493	212.532
Halictidae	HAL LAS DIA 018	Ponderosa	78.836	212.555
Halictidae	HAL LAS DIA 018	Ponderosa	78.8176	212.558
Halictidae	HAL LAS DIA 018	Ponderosa	78.8082	212.56
Halictidae	HAL LAS DIA 018	Ponderosa	78.7665	212.581
Halictidae	HAL LAS DIA 018	Ponderosa	78.7242	212.584
Halictidae	HAL LAS DIA 018	Ponderosa	78.6912	212.586
Halictidae	HAL LAS DIA 018	Ponderosa	78.6819	212.601
Halictidae	HAL LAS DIA 018	Ponderosa	78.6388	212.607
Halictidae	HAL LAS DIA 024	Spruce-fir	96.6762	211.776
Halictidae	HAL LAS DIA 024	Spruce-fir	96.6536	211.784
Halictidae	HAL LAS DIA 024	Spruce-fir	96.4917	211.792
Halictidae	HAL LAS DIA 024	Spruce-fir	96.3895	211.8
Halictidae	HAL LAS DIA 024	Spruce-fir	96.2648	211.808
Halictidae	HAL LAS DIA 024	Spruce-fir	96.2157	211.817
Halictidae	HAL LAS DIA 024	Spruce-fir	96.1517	211.825
Halictidae	HAL LAS DIA 024	Spruce-fir	96.0164	211.833
Halictidae	HAL LAS DIA 024	Spruce-fir	95.9022	211.841
Halictidae	HAL LAS DIA 024	Spruce-fir	95.7347	211.85
Halictidae	HAL LAS HAS 001	Mixed Conifer	91.76	702.403
Halictidae	HAL LAS HAS 001	Mixed Conifer	91.7684	702.317
Halictidae	HAL LAS HAS 001	Mixed Conifer	91.793	702.187
Halictidae	HAL LAS HAS 001	Mixed Conifer	91.797	701.284
Halictidae	HAL LAS HAS 001	Mixed Conifer	91.826	701.099
Halictidae	HAL LAS HAS 001	Mixed Conifer	91.8292	700.947
Halictidae	HAL LAS HAS 001	Ponderosa	79.0868	624.492
Halictidae	HAL LAS HAS 001	Ponderosa	79.0764	626.455
Halictidae	HAL MAC 001	Mixed Conifer	91.8531	700.939
Halictidae	HAL MAC 001	Mixed Conifer	91.8591	700.051
Halictidae	HAL MAC 001	Ponderosa	79.1248	622.23
Halictidae	HAL MAC 001	Ponderosa	79.0979	622.535
Halictidae	HAL SPH 001	Mixed Conifer	91.8924	699.931
Halictidae	HAL SPH 001	Mixed Conifer	91.9091	699.931
Halictidae	HAL SPH 003	Mixed Conifer	91.9257	699.846
Halictidae	HAL SPH 003	Mixed Conifer	91.9591	698.56
Halictidae	HAL SPH 003	Mixed Conifer	91.9648	697.131
Halictidae	HAL SPH 003	Mixed Conifer	91.9927	696.899
Halictidae	Lasioglossum coriaceum	Spruce-fir	97.8256	222.094
Halictidae	Lasioglossum coriaceum	Spruce-fir	97.9134	222.358
Halictidae	Lasioglossum coriaceum	Spruce-fir	97.9564	222.622
Halictidae	Lasioglossum coriaceum	Spruce-fir	97.9891	222.877
Halictidae	Lasioglossum desertum	Mixed Conifer	92.0601	234.898
Halictidae	Lasioglossum desertum	Mixed Conifer	92.0758	235.42
Halictidae	Lasioglossum desertum	Mixed Conifer	92.0936	235.946
Halictidae	Lasioglossum desertum	Mixed Conifer	92.094	236.465
Halictidae	Lasioglossum desertum	Mixed Conifer	92.1272	236.987
Halictidae	Lasioglossum desertum	Mixed Conifer	92.1279	237.489
Halictidae	Lasioglossum desertum	Mixed Conifer	92.1309	237.926
Halictidae	Lasioglossum desertum	Mixed Conifer	92.1618	238.171
Halictidae	Lasioglossum desertum	Mixed Conifer	92.1667	238.642
Halictidae	Lasioglossum desertum	Mixed Conifer	92.1859	240.657
Halictidae	Lasioglossum desertum	Mixed Conifer	92.1953	241.773
Halictidae	Lasioglossum desertum	Mixed Conifer	92.2289	252.022
Halictidae	Lasioglossum desertum	Mixed Conifer	92.2294	260.791
Halictidae	Lasioglossum desertum	Mixed Conifer	92.2406	265.963
Halictidae	Lasioglossum desertum	Mixed Conifer	92.2618	268.197
Halictidae	Lasioglossum desertum	Mixed Conifer	92.2945	268.352
Halictidae	Lasioglossum desertum	Mixed Conifer	92.2952	275.128
Halictidae	Lasioglossum desertum	Mixed Conifer	92.3267	275.982
Halictidae	Lasioglossum desertum	Mixed Conifer	92.3494	276.302
Halictidae	Lasioglossum desertum	Mixed Conifer	92.3584	276.454
Halictidae	Lasioglossum desertum	Mixed Conifer	92.39	282.651
Halictidae	Lasioglossum desertum	Mixed Conifer	92.4034	285.085
Halictidae	Lasioglossum desertum	Mixed Conifer	92.4211	562.015
Halictidae	Lasioglossum desertum	Mixed Conifer	92.4268	562.025
Halictidae	Lasioglossum desertum	Mixed Conifer	92.4521	562.147
Halictidae	Lasioglossum desertum	Mixed Conifer	92.4571	562.211
Halictidae	Lasioglossum desertum	Mixed Conifer	92.4822	562.506
Halictidae	Lasioglossum desertum	Mixed Conifer	92.5101	562.532
Halictidae	Lasioglossum desertum	Mixed Conifer	92.5116	562.557
Halictidae	Lasioglossum desertum	Mixed Conifer	92.5411	562.613
Halictidae	Lasioglossum desertum	Mixed Conifer	92.5624	562.646
Halictidae	Lasioglossum desertum	Mixed Conifer	92.5698	562.697
Halictidae	Lasioglossum desertum	Mixed Conifer	92.5763	562.86
Halictidae	Lasioglossum desertum	Mixed Conifer	92.5976	562.903
Halictidae	Lasioglossum desertum	Mixed Conifer	92.6104	562.912
Halictidae	Lasioglossum desertum	Mixed Conifer	92.6144	563.314
Halictidae	Lasioglossum desertum	Mixed Conifer	92.6218	563.386
Halictidae	Lasioglossum desertum	Mixed Conifer	92.6254	563.405
Halictidae	Lasioglossum desertum	Mixed Conifer	92.6525	563.48
Halictidae	Lasioglossum desertum	Mixed Conifer	92.6616	563.486
Halictidae	Lasioglossum desertum	Mixed Conifer	92.6787	563.512
Halictidae	Lasioglossum desertum	Mixed Conifer	92.7048	563.621
Halictidae	Lasioglossum desertum	Mixed Conifer	92.7086	563.632
Halictidae	Lasioglossum desertum	Mixed Conifer	92.7282	563.696
Halictidae	Lasioglossum desertum	Mixed Conifer	92.7302	563.835
Halictidae	Lasioglossum desertum	Mixed Conifer	92.7364	563.887
Halictidae	Lasioglossum desertum	Mixed Conifer	92.7547	563.955
Halictidae	Lasioglossum desertum	Mixed Conifer	92.7642	564
Halictidae	Lasioglossum desertum	Mixed Conifer	92.7792	564.028
Halictidae	Lasioglossum desertum	Mixed Conifer	92.7918	564.093
Halictidae	Lasioglossum desertum	Mixed Conifer	92.8036	564.264
Halictidae	Lasioglossum desertum	Mixed Conifer	92.8153	564.306
Halictidae	Lasioglossum desertum	Mixed Conifer	92.8274	564.692
Halictidae	Lasioglossum desertum	Mixed Conifer	92.8372	564.705
Halictidae	Lasioglossum desertum	Mixed Conifer	92.8512	564.828
Halictidae	Lasioglossum desertum	Mixed Conifer	92.8579	564.842
Halictidae	Lasioglossum desertum	Mixed Conifer	92.8739	565.265
Halictidae	Lasioglossum desertum	Mixed Conifer	92.8782	565.36
Halictidae	Lasioglossum desertum	Mixed Conifer	92.8967	565.41
Halictidae	Lasioglossum desertum	Mixed Conifer	92.8983	565.601
Halictidae	Lasioglossum desertum	Mixed Conifer	92.918	565.618
Halictidae	Lasioglossum desertum	Mixed Conifer	92.9185	565.639
Halictidae	Lasioglossum desertum	Mixed Conifer	92.9371	566.165
Halictidae	Lasioglossum desertum	Mixed Conifer	92.9396	566.506
Halictidae	Lasioglossum desertum	Mixed Conifer	92.9557	566.884
Halictidae	Lasioglossum desertum	Mixed Conifer	92.9604	567.003
Halictidae	Lasioglossum desertum	Mixed Conifer	92.9669	567.397
Halictidae	Lasioglossum desertum	Mixed Conifer	92.9742	567.864
Halictidae	Lasioglossum desertum	Mixed Conifer	92.9803	567.916
Halictidae	Lasioglossum desertum	Mixed Conifer	92.9923	568.32
Halictidae	Lasioglossum desertum	Mixed Conifer	92.9986	568.362
Halictidae	Lasioglossum desertum	Mixed Conifer	92.9998	568.763
Halictidae	Lasioglossum desertum	Mixed Conifer	93.0089	568.911
Halictidae	Lasioglossum desertum	Mixed Conifer	93.0186	569.292
Halictidae	Lasioglossum desertum	Mixed Conifer	93.0252	569.85
Halictidae	Lasioglossum desertum	Mixed Conifer	93.0289	569.963
Halictidae	Lasioglossum desertum	Ponderosa	79.1624	109.931
Halictidae	Lasioglossum desertum	Ponderosa	79.1893	109.931
Halictidae	Lasioglossum desertum	Ponderosa	79.1995	109.931
Halictidae	Lasioglossum desertum	Ponderosa	79.2346	109.931
Halictidae	Lasioglossum desertum	Ponderosa	79.2362	109.931
Halictidae	Lasioglossum desertum	Ponderosa	79.2653	109.932
Halictidae	Lasioglossum desertum	Ponderosa	79.2724	109.932
Halictidae	Lasioglossum desertum	Ponderosa	79.2797	109.934
Halictidae	Lasioglossum desertum	Ponderosa	79.3082	109.937
Halictidae	Lasioglossum desertum	Ponderosa	79.3245	109.945
Halictidae	Lasioglossum desertum	Ponderosa	79.3435	109.954
Halictidae	Lasioglossum desertum	Ponderosa	79.3691	109.954
Halictidae	Lasioglossum desertum	Ponderosa	79.3783	109.968
Halictidae	Lasioglossum desertum	Ponderosa	79.4127	109.99
Halictidae	Lasioglossum desertum	Ponderosa	79.4135	110.025
Halictidae	Lasioglossum desertum	Ponderosa	79.4466	110.025
Halictidae	Lasioglossum desertum	Ponderosa	79.454	110.167
Halictidae	Lasioglossum desertum	Ponderosa	79.4576	110.309
Halictidae	Lasioglossum desertum	Ponderosa	79.48	110.309
Halictidae	Lasioglossum desertum	Ponderosa	83.8307	168.033
Halictidae	Lasioglossum desertum	Ponderosa	83.8719	171.227
Halictidae	Lasioglossum desertum	Ponderosa	80.1699	171.419
Halictidae	Lasioglossum desertum	Ponderosa	80.1705	171.807
Halictidae	Lasioglossum desertum	Ponderosa	80.1852	172.884
Halictidae	Lasioglossum desertum	Ponderosa	80.1912	173.077
Halictidae	Lasioglossum desertum	Ponderosa	80.193	173.217
Halictidae	Lasioglossum desertum	Ponderosa	80.193	173.805
Halictidae	Lasioglossum desertum	Ponderosa	80.1982	174.326
Halictidae	Lasioglossum desertum	Ponderosa	80.2087	174.439
Halictidae	Lasioglossum desertum	Ponderosa	80.2114	174.877
Halictidae	Lasioglossum desertum	Ponderosa	80.2175	175.131
Halictidae	Lasioglossum desertum	Ponderosa	80.231	175.376
Halictidae	Lasioglossum desertum	Ponderosa	80.2444	175.44
Halictidae	Lasioglossum desertum	Ponderosa	80.25	175.442
Halictidae	Lasioglossum desertum	Ponderosa	80.2686	177.077
Halictidae	Lasioglossum desertum	Ponderosa	80.2769	177.101
Halictidae	Lasioglossum desertum	Ponderosa	80.2866	177.174
Halictidae	Lasioglossum desertum	Ponderosa	80.299	177.281
Halictidae	Lasioglossum desertum	Ponderosa	80.3042	177.299
Halictidae	Lasioglossum desertum	Ponderosa	80.3081	177.38
Halictidae	Lasioglossum desertum	Ponderosa	80.3214	177.408
Halictidae	Lasioglossum desertum	Ponderosa	80.338	178.256
Halictidae	Lasioglossum desertum	Ponderosa	80.3391	178.51
Halictidae	Lasioglossum desertum	Ponderosa	80.3545	178.673
Halictidae	Lasioglossum desertum	Ponderosa	80.3577	179.547
Halictidae	Lasioglossum desertum	Ponderosa	80.3597	179.687
Halictidae	Lasioglossum desertum	Ponderosa	80.3656	180.583
Halictidae	Lasioglossum desertum	Ponderosa	80.3709	181.068
Halictidae	Lasioglossum desertum	Ponderosa	80.3711	181.455
Halictidae	Lasioglossum desertum	Ponderosa	80.3873	182.026
Halictidae	Lasioglossum desertum	Ponderosa	80.3917	182.253
Halictidae	Lasioglossum desertum	Ponderosa	80.4031	183.009
Halictidae	Lasioglossum desertum	Ponderosa	80.4138	183.44
Halictidae	Lasioglossum desertum	Ponderosa	80.4175	183.771
Halictidae	Lasioglossum desertum	Ponderosa	80.4184	184.208
Halictidae	Lasioglossum desertum	Ponderosa	80.4335	184.397
Halictidae	Lasioglossum desertum	Ponderosa	80.4424	184.637
Halictidae	Lasioglossum desertum	Ponderosa	80.4426	185.327
Halictidae	Lasioglossum desertum	Ponderosa	80.4483	185.507
Halictidae	Lasioglossum desertum	Ponderosa	80.4626	186.376
Halictidae	Lasioglossum desertum	Ponderosa	80.4671	186.654
Halictidae	Lasioglossum desertum	Ponderosa	80.4717	186.8
Halictidae	Lasioglossum desertum	Ponderosa	80.4765	187.133
Halictidae	Lasioglossum desertum	Ponderosa	80.4892	187.238
Halictidae	Lasioglossum desertum	Ponderosa	80.4898	187.249
Halictidae	Lasioglossum desertum	Ponderosa	80.4981	188.126
Halictidae	Lasioglossum desertum	Ponderosa	80.5003	189.007
Halictidae	Lasioglossum desertum	Ponderosa	80.5026	189.237
Halictidae	Lasioglossum desertum	Ponderosa	80.5113	189.893
Halictidae	Lasioglossum desertum	Ponderosa	80.515	190.147
Halictidae	Lasioglossum desertum	Ponderosa	80.5175	190.42
Halictidae	Lasioglossum desertum	Ponderosa	80.5194	190.601
Halictidae	Lasioglossum desertum	Ponderosa	80.5195	190.784
Halictidae	Lasioglossum desertum	Ponderosa	80.5273	191.679
Halictidae	Lasioglossum desertum	Ponderosa	80.5276	191.706
Halictidae	Lasioglossum desertum	Ponderosa	80.5358	192.297
Halictidae	Lasioglossum desertum	Ponderosa	80.5392	192.578
Halictidae	Lasioglossum desertum	Ponderosa	80.5505	192.601
Halictidae	Lasioglossum desertum	Ponderosa	80.5613	193.156
Halictidae	Lasioglossum desertum	Ponderosa	80.5715	193.483
Halictidae	Lasioglossum desertum	Ponderosa	80.5812	193.697
Halictidae	Lasioglossum desertum	Ponderosa	80.5909	194.21
Halictidae	Lasioglossum desertum	Ponderosa	80.6001	194.239
Halictidae	Lasioglossum desertum	Ponderosa	80.6087	194.392
Halictidae	Lasioglossum desertum	Ponderosa	80.6168	194.782
Halictidae	Lasioglossum desertum	Ponderosa	80.6244	195.059
Halictidae	Lasioglossum desertum	Ponderosa	80.6314	195.282
Halictidae	Lasioglossum desertum	Ponderosa	80.6378	195.306
Halictidae	Lasioglossum desertum	Ponderosa	80.6381	195.757
Halictidae	Lasioglossum desertum	Ponderosa	80.6437	196.225
Halictidae	Lasioglossum desertum	Ponderosa	80.6492	196.234
Halictidae	Lasioglossum desertum	Ponderosa	80.6545	196.748
Halictidae	Lasioglossum desertum	Ponderosa	80.6599	196.769
Halictidae	Lasioglossum desertum	Ponderosa	80.6651	196.822
Halictidae	Lasioglossum desertum	Ponderosa	80.6703	197.149
Halictidae	Lasioglossum desertum	Ponderosa	80.6753	197.306
Halictidae	Lasioglossum desertum	Ponderosa	80.6778	197.676
Halictidae	Lasioglossum desertum	Ponderosa	80.6802	197.841
Halictidae	Lasioglossum desertum	Ponderosa	80.685	198.077
Halictidae	Lasioglossum desertum	Ponderosa	80.6898	198.378
Halictidae	Lasioglossum desertum	Ponderosa	80.6944	198.916
Halictidae	Lasioglossum desertum	Ponderosa	80.699	199.011
Halictidae	Lasioglossum desertum	Ponderosa	80.7034	199.32
Halictidae	Lasioglossum desertum	Ponderosa	80.7077	199.455
Halictidae	Lasioglossum desertum	Ponderosa	80.712	199.949
Halictidae	Lasioglossum desertum	Ponderosa	80.7162	199.996
Halictidae	Lasioglossum desertum	Ponderosa	80.7203	200.192
Halictidae	Lasioglossum desertum	Ponderosa	80.7242	200.539
Halictidae	Lasioglossum desertum	Ponderosa	80.728	200.892
Halictidae	Lasioglossum desertum	Ponderosa	80.7318	201.083
Halictidae	Lasioglossum desertum	Ponderosa	80.7356	201.629
Halictidae	Lasioglossum desertum	Ponderosa	80.7391	201.84
Halictidae	Lasioglossum desertum	Ponderosa	80.7426	201.928
Halictidae	Lasioglossum desertum	Ponderosa	80.746	202.177
Halictidae	Lasioglossum desertum	Ponderosa	83.7224	213.438
Halictidae	Lasioglossum desertum	Ponderosa	83.713	213.462
Halictidae	Lasioglossum desertum	Ponderosa	83.5705	213.478
Halictidae	Lasioglossum desertum	Ponderosa	83.4337	213.481
Halictidae	Lasioglossum desertum	Ponderosa	83.4305	213.49
Halictidae	Lasioglossum desertum	Ponderosa	83.4179	213.508
Halictidae	Lasioglossum desertum	Ponderosa	83.2648	213.52
Halictidae	Lasioglossum desertum	Ponderosa	83.1584	213.547
Halictidae	Lasioglossum desertum	Ponderosa	83.1117	213.552
Halictidae	Lasioglossum desertum	Ponderosa	82.9573	213.553
Halictidae	Lasioglossum desertum	Ponderosa	82.8904	213.56
Halictidae	Lasioglossum desertum	Ponderosa	82.8007	213.586
Halictidae	Lasioglossum desertum	Ponderosa	82.7972	213.609
Halictidae	Lasioglossum desertum	Ponderosa	82.6382	213.623
Halictidae	Lasioglossum desertum	Ponderosa	82.6208	213.658
Halictidae	Lasioglossum desertum	Ponderosa	82.615	213.692
Halictidae	Lasioglossum desertum	Ponderosa	79.9584	213.724
Halictidae	Lasioglossum desertum	Ponderosa	79.9438	213.754
Halictidae	Lasioglossum desertum	Ponderosa	79.9321	213.772
Halictidae	Lasioglossum desertum	Ponderosa	79.9272	213.781
Halictidae	Lasioglossum desertum	Ponderosa	79.9051	213.796
Halictidae	Lasioglossum desertum	Ponderosa	79.8857	213.805
Halictidae	Lasioglossum desertum	Ponderosa	79.8798	213.818
Halictidae	Lasioglossum desertum	Ponderosa	79.8777	213.826
Halictidae	Lasioglossum desertum	Ponderosa	79.8497	213.836
Halictidae	Lasioglossum desertum	Ponderosa	79.8485	213.844
Halictidae	Lasioglossum desertum	Ponderosa	79.844	213.852
Halictidae	Lasioglossum desertum	Ponderosa	79.8216	213.859
Halictidae	Lasioglossum desertum	Ponderosa	79.8212	213.865
Halictidae	Lasioglossum desertum	Ponderosa	79.802	213.87
Halictidae	Lasioglossum desertum	Ponderosa	79.7921	213.875
Halictidae	Lasioglossum desertum	Ponderosa	79.7627	213.879
Halictidae	Lasioglossum desertum	Ponderosa	79.7598	213.882
Halictidae	Lasioglossum desertum	Ponderosa	79.7489	213.884
Halictidae	Lasioglossum desertum	Ponderosa	79.7332	213.886
Halictidae	Lasioglossum desertum	Ponderosa	79.7208	213.886
Halictidae	Lasioglossum desertum	Ponderosa	79.7174	214.064
Halictidae	Lasioglossum desertum	Ponderosa	79.7032	214.352
Halictidae	Lasioglossum desertum	Ponderosa	79.699	214.454
Halictidae	Lasioglossum desertum	Ponderosa	79.6747	214.554
Halictidae	Lasioglossum desertum	Ponderosa	79.6727	214.622
Halictidae	Lasioglossum desertum	Ponderosa	79.6417	214.648
Halictidae	Lasioglossum desertum	Ponderosa	79.6317	214.651
Halictidae	Lasioglossum desertum	Ponderosa	79.629	214.658
Halictidae	Lasioglossum desertum	Ponderosa	79.6102	214.746
Halictidae	Lasioglossum desertum	Ponderosa	79.5886	214.767
Halictidae	Lasioglossum desertum	Ponderosa	79.5781	214.839
Halictidae	Lasioglossum desertum	Ponderosa	79.5573	214.873
Halictidae	Lasioglossum desertum	Ponderosa	79.5456	214.93
Halictidae	Lasioglossum desertum	Ponderosa	79.5451	215.019
Halictidae	Lasioglossum desertum	Ponderosa	79.5404	215.039
Halictidae	Lasioglossum desertum	Ponderosa	79.5129	215.101
Halictidae	Lasioglossum desertum	Ponderosa	79.5015	215.105
Halictidae	Lasioglossum desertum	Ponderosa	79.4903	215.189
Halictidae	Lasioglossum desertum	Spruce-fir	97.9973	570.316
Halictidae	Lasioglossum desertum	Spruce-fir	97.9993	571.062
Halictidae	Lasioglossum egregium	Mixed Conifer	93.0365	227.529
Halictidae	Lasioglossum egregium	Mixed Conifer	93.041	227.836
Halictidae	Lasioglossum egregium	Mixed Conifer	93.0543	228.325
Halictidae	Lasioglossum egregium	Mixed Conifer	93.0564	228.815
Halictidae	Lasioglossum egregium	Mixed Conifer	93.071	229.308
Halictidae	Lasioglossum egregium	Mixed Conifer	93.0712	229.803
Halictidae	Lasioglossum egregium	Mixed Conifer	93.0859	230.3
Halictidae	Lasioglossum egregium	Mixed Conifer	93.0875	230.345
Halictidae	Lasioglossum egregium	Mixed Conifer	93.1	230.585
Halictidae	Lasioglossum egregium	Mixed Conifer	93.1029	230.801
Halictidae	Lasioglossum egregium	Mixed Conifer	93.1131	231.106
Halictidae	Lasioglossum egregium	Mixed Conifer	93.1179	231.304
Halictidae	Lasioglossum egregium	Mixed Conifer	93.122	231.809
Halictidae	Lasioglossum egregium	Mixed Conifer	93.1246	232.317
Halictidae	Lasioglossum egregium	Mixed Conifer	93.1321	232.828
Halictidae	Lasioglossum egregium	Mixed Conifer	93.136	233.014
Halictidae	Lasioglossum egregium	Mixed Conifer	93.1455	233.341
Halictidae	Lasioglossum egregium	Mixed Conifer	93.1469	233.857
Halictidae	Lasioglossum egregium	Ponderosa	80.7493	77.5604
Halictidae	Lasioglossum egregium	Ponderosa	80.7526	78.1725
Halictidae	Lasioglossum egregium	Ponderosa	80.7557	84.747
Halictidae	Lasioglossum egregium	Ponderosa	80.7587	106.902
Halictidae	Lasioglossum egregium	Ponderosa	80.7617	106.902
Halictidae	Lasioglossum egregium	Ponderosa	80.7646	106.902
Halictidae	Lasioglossum egregium	Ponderosa	80.7674	107.485
Halictidae	Lasioglossum egregium	Ponderosa	80.7701	109.174
Halictidae	Lasioglossum egregium	Ponderosa	80.7728	109.174
Halictidae	Lasioglossum egregium	Ponderosa	80.7754	109.457
Halictidae	Lasioglossum egregium	Ponderosa	80.7779	109.741
Halictidae	Lasioglossum egregium	Ponderosa	80.7803	109.741
Halictidae	Lasioglossum egregium	Ponderosa	80.7826	109.812
Halictidae	Lasioglossum egregium	Ponderosa	80.7849	109.812
Halictidae	Lasioglossum egregium	Ponderosa	80.8382	109.842
Halictidae	Lasioglossum egregium	Ponderosa	80.8386	109.857
Halictidae	Lasioglossum egregium	Ponderosa	80.8973	109.871
Halictidae	Lasioglossum egregium	Ponderosa	80.9999	109.883
Halictidae	Lasioglossum egregium	Ponderosa	81.128	109.883
Halictidae	Lasioglossum egregium	Ponderosa	81.1432	109.901
Halictidae	Lasioglossum egregium	Ponderosa	81.1617	109.912
Halictidae	Lasioglossum egregium	Ponderosa	81.3241	109.919
Halictidae	Lasioglossum egregium	Spruce-fir	97.9998	234.376
Halictidae	Lasioglossum egregium	Spruce-fir	98	371.342
Halictidae	Lasioglossum egregium	Spruce-fir	98	371.389
Halictidae	Lasioglossum egregium	Spruce-fir	98	371.91
Halictidae	Lasioglossum egregium	Spruce-fir	98	372.182
Halictidae	Lasioglossum egregium	Spruce-fir	109.12	372.487
Halictidae	Lasioglossum egregium	Spruce-fir	109.132	372.839
Halictidae	Lasioglossum egregium	Spruce-fir	109.135	373.076
Halictidae	Lasioglossum petrellum	Mixed Conifer	93.1574	573.327
Halictidae	Lasioglossum petrellum	Mixed Conifer	93.1584	574.053
Halictidae	Lasioglossum pruinosiformis	Mixed Conifer	93.1674	116.635
Halictidae	Lasioglossum pruinosiformis	Mixed Conifer	93.1703	119.497
Halictidae	Lasioglossum pruinosiformis	Mixed Conifer	93.1773	119.756
Halictidae	Lasioglossum pruinosiformis	Mixed Conifer	93.1819	119.865
Halictidae	Lasioglossum pruinosiformis	Mixed Conifer	93.1869	122.272
Halictidae	Lasioglossum pruinosiformis	Mixed Conifer	93.1922	124.396
Halictidae	Lasioglossum pruinosiformis	Mixed Conifer	93.1961	124.396
Halictidae	Lasioglossum pruinosiformis	Mixed Conifer	93.2024	125.29
Halictidae	Lasioglossum pruinosiformis	Mixed Conifer	93.2049	128.379
Halictidae	Lasioglossum pruinosiformis	Mixed Conifer	93.2114	132.625
Halictidae	Lasioglossum pruinosiformis	Mixed Conifer	93.213	133.049
Halictidae	Lasioglossum pruinosiformis	Mixed Conifer	93.2198	133.401
Halictidae	Lasioglossum pruinosiformis	Mixed Conifer	93.2209	134.292
Halictidae	Lasioglossum pruinosiformis	Mixed Conifer	93.2273	134.298
Halictidae	Lasioglossum pruinosiformis	Mixed Conifer	93.2283	134.48
Halictidae	Lasioglossum pruinosiformis	Mixed Conifer	93.2339	134.542
Halictidae	Lasioglossum pruinosiformis	Mixed Conifer	93.2353	134.69
Halictidae	Lasioglossum pruinosiformis	Mixed Conifer	93.24	134.752
Halictidae	Lasioglossum pruinosiformis	Mixed Conifer	93.2418	134.761
Halictidae	Lasioglossum pruinosiformis	Mixed Conifer	93.2455	134.761
Halictidae	Lasioglossum pruinosiformis	Mixed Conifer	93.2477	134.763
Halictidae	Lasioglossum pruinosiformis	Mixed Conifer	93.2506	134.763
Halictidae	Lasioglossum pruinosiformis	Mixed Conifer	93.2527	134.763
Halictidae	Lasioglossum pruinosiformis	Mixed Conifer	93.2554	134.766
Halictidae	Lasioglossum pruinosiformis	Mixed Conifer	93.2567	134.771
Halictidae	Lasioglossum pruinosiformis	Mixed Conifer	93.2696	134.776
Halictidae	Lasioglossum pruinosiformis	Mixed Conifer	93.2702	134.795
Halictidae	Lasioglossum pruinosiformis	Mixed Conifer	93.2716	134.797
Halictidae	Lasioglossum pruinosiformis	Mixed Conifer	93.2718	134.826
Halictidae	Lasioglossum pruinosiformis	Mixed Conifer	93.2727	134.85
Halictidae	Lasioglossum pruinosiformis	Mixed Conifer	93.2728	134.852
Halictidae	Lasioglossum pruinosiformis	Mixed Conifer	93.2732	135.147
Halictidae	Lasioglossum pruinosiformis	Mixed Conifer	93.2772	135.308
Halictidae	Lasioglossum pruinosiformis	Mixed Conifer	93.346	135.343
Halictidae	Lasioglossum pruinosiformis	Ponderosa	81.3595	19.722
Halictidae	Lasioglossum pruinosiformis	Ponderosa	81.4744	19.7835
Halictidae	Lasioglossum pruinosiformis	Ponderosa	81.4869	19.7835
Halictidae	Lasioglossum pruinosiformis	Ponderosa	81.5043	19.7835
Halictidae	Lasioglossum pruinosiformis	Ponderosa	81.5946	19.7835
Halictidae	Lasioglossum pruinosiformis	Ponderosa	81.6003	19.8059
Halictidae	Lasioglossum pruinosiformis	Ponderosa	81.6171	19.8059
Halictidae	Lasioglossum pruinosiformis	Ponderosa	81.6228	19.8199
Halictidae	Lasioglossum pruinosiformis	Ponderosa	81.6242	19.8199
Halictidae	Lasioglossum pruinosiformis	Ponderosa	81.6245	19.8199
Halictidae	Lasioglossum pruinosiformis	Ponderosa	81.6246	19.826
Halictidae	Lasioglossum pruinosiformis	Ponderosa	81.6247	19.826
Halictidae	Lasioglossum pruinosiformis	Ponderosa	81.6249	19.826
Halictidae	Lasioglossum pruinosiformis	Ponderosa	81.6256	19.826
Halictidae	Lasioglossum pruinosiformis	Ponderosa	81.6284	19.826
Halictidae	Lasioglossum pruinosiformis	Ponderosa	81.6397	19.826
Halictidae	Lasioglossum pruinosiformis	Ponderosa	81.6502	19.826
Halictidae	Lasioglossum pruinosiformis	Ponderosa	81.6848	19.8267
Halictidae	Lasioglossum pruinosiformis	Ponderosa	81.814	19.8269
Halictidae	Lasioglossum pruinosiformis	Ponderosa	81.8462	19.8269
Halictidae	Lasioglossum pruinosiformis	Ponderosa	81.8654	19.827
Halictidae	Lasioglossum pruinosiformis	Ponderosa	81.9784	19.827
Halictidae	Lasioglossum pruinosiformis	Ponderosa	82.062	19.827
Halictidae	Lasioglossum pruinosiformis	Ponderosa	82.062	19.827
Halictidae	Lasioglossum pruinosiformis	Ponderosa	82.062	19.827
Halictidae	Lasioglossum pruinosiformis	Ponderosa	82.0999	19.827
Halictidae	Lasioglossum pruinosiformis	Ponderosa	82.143	19.8272
Halictidae	Lasioglossum pruinosiformis	Ponderosa	82.1863	19.828
Halictidae	Lasioglossum pruinosiformis	Ponderosa	82.3081	19.8321
Halictidae	Lasioglossum pruinosiformis	Ponderosa	82.3594	19.8321
Halictidae	Lasioglossum pruinosiformis	Ponderosa	82.4731	19.8321
Halictidae	Lasioglossum pruinosiformis	Ponderosa	82.5875	19.8321
Halictidae	Lasioglossum pruinosiformis	Ponderosa	82.615	19.8441
Halictidae	Lasioglossum pruinosiformis	Ponderosa	83.9934	19.8441
Halictidae	Lasioglossum pruinosiformis	Ponderosa	84.0219	19.8441
Halictidae	Lasioglossum pruinosiformis	Ponderosa	84.0398	19.8441
Halictidae	Lasioglossum pruinosiformis	Ponderosa	85.4501	19.8503
Halictidae	Lasioglossum pruinosiformis	Ponderosa	85.476	19.8503
Halictidae	Lasioglossum pruinosiformis	Ponderosa	85.476	19.8503
Halictidae	Lasioglossum pruinosiformis	Ponderosa	85.5064	19.8503
Halictidae	Lasioglossum pruinosiformis	Ponderosa	85.5415	19.9232
Halictidae	Lasioglossum pruinosiformis	Ponderosa	85.6327	19.9232
Halictidae	Lasioglossum pruinosiformis	Ponderosa	85.7224	19.9232
Halictidae	Lasioglossum pruinosiformis	Ponderosa	85.8109	19.9232
Halictidae	Lasioglossum pruinosiformis	Ponderosa	85.8429	20.0259
Halictidae	Lasioglossum pruinosiformis	Ponderosa	85.8603	20.0259
Halictidae	Lasioglossum pruinosiformis	Ponderosa	85.8995	20.0259
Halictidae	Lasioglossum pruinosiformis	Ponderosa	85.9885	20.1602
Halictidae	Lasioglossum pruinosiformis	Ponderosa	86.0738	20.1602
Halictidae	Lasioglossum pruinosiformis	Ponderosa	86.1592	20.1602
Halictidae	Lasioglossum pruinosiformis	Ponderosa	86.1742	20.5631
Halictidae	Lasioglossum pruinosiformis	Ponderosa	86.2435	20.5631
Halictidae	Lasioglossum pruinosiformis	Ponderosa	86.2482	20.5631
Halictidae	Lasioglossum pruinosiformis	Ponderosa	86.2482	21.0803
Halictidae	Lasioglossum pruinosiformis	Ponderosa	86.3258	21.3257
Halictidae	Lasioglossum pruinosiformis	Ponderosa	86.4084	21.3538
Halictidae	Lasioglossum pruinosiformis	Ponderosa	86.42	111.445
Halictidae	Lasioglossum pruinosiformis	Ponderosa	86.441	111.445
Halictidae	Lasioglossum pruinosiformis	Ponderosa	86.4891	113.248
Halictidae	Lasioglossum pruinosiformis	Ponderosa	86.495	113.248
Halictidae	Lasioglossum pruinosiformis	Ponderosa	86.5075	114.73
Halictidae	Lasioglossum pruinosiformis	Ponderosa	86.5699	115.987
Halictidae	Lasioglossum pruinosiformis	Ponderosa	86.6509	115.987
Halictidae	Lasioglossum pruinosiformis	Ponderosa	86.7318	115.987
Halictidae	Lasioglossum pruinosiformis	Spruce-fir	109.137	136.852
Halictidae	Lasioglossum pruinosiformis	Spruce-fir	109.138	136.868
Halictidae	Lasioglossum pruinosiformis	Spruce-fir	109.139	138.716
Halictidae	Lasioglossum pruinosiformis	Spruce-fir	109.139	139.878
Halictidae	Lasioglossum pruinosiformis	Spruce-fir	109.139	139.878
Halictidae	Lasioglossum pruinosiformis	Spruce-fir	109.139	142.883
Halictidae	Lasioglossum pruinosiformis	Spruce-fir	109.139	153.791
Halictidae	Lasioglossum pruinosiformis	Spruce-fir	109.139	154.873
Halictidae	Lasioglossum pruinosiformis	Spruce-fir	109.14	154.873
Halictidae	Lasioglossum pruinosiformis	Spruce-fir	109.14	160.693
Halictidae	Lasioglossum pruinosiformis	Spruce-fir	109.14	164.427
Halictidae	Lasioglossum pruinosiformis	Spruce-fir	109.142	165.217
Halictidae	Lasioglossum pruinosum	Mixed Conifer	93.3716	693.757
Halictidae	Lasioglossum pruinosum	Mixed Conifer	93.4604	693.562
Halictidae	Lasioglossum sisymbrii	Mixed Conifer	93.5556	693.492
Halictidae	Lasioglossum sisymbrii	Mixed Conifer	93.6422	692.554
Halictidae	Lasioglossum sisymbrii	Mixed Conifer	93.6545	692.355
Halictidae	Lasioglossum sisymbrii	Mixed Conifer	93.6889	692.157
Halictidae	Lasioglossum sisymbrii	Ponderosa	86.7965	109.923
Halictidae	Lasioglossum sisymbrii	Ponderosa	86.8116	109.928
Halictidae	Lasioglossum sisymbrii	Ponderosa	86.844	109.929
Halictidae	Lasioglossum sisymbrii	Ponderosa	86.8902	109.93
Halictidae	Lasioglossum sisymbrii	Ponderosa	86.9687	109.93
Halictidae	Lasioglossum sisymbrii	Ponderosa	86.976	109.93
Halictidae	Lasioglossum sisymbrii	Ponderosa	86.9793	109.931
Halictidae	Lasioglossum sisymbrii	Ponderosa	87.046	620.083
Megachilidae	Anthidium porterae	Mixed Conifer	69.5416	141.062
Megachilidae	Anthidium porterae	Mixed Conifer	69.5669	148.045
Megachilidae	Anthidium porterae	Mixed Conifer	69.6932	149.026
Megachilidae	Anthidium porterae	Mixed Conifer	69.7426	151.97
Megachilidae	cehphlosmi	Spruce-fir	75.2499	225.577
Megachilidae	cehphlosmi	Spruce-fir	75.3136	225.85
Megachilidae	Coelioxys gilensis	Ponderosa	65.1353	225.889
Megachilidae	Coelioxys gilensis	Ponderosa	69.7663	226.124
Megachilidae	Coelioxys moesta	Mixed Conifer	69.8199	226.378
Megachilidae	Coelioxys moesta	Mixed Conifer	69.9423	226.399
Megachilidae	Dianthidium cressonii	Mixed Conifer	71.9864	8.94671
Megachilidae	Dianthidium cressonii	Mixed Conifer	72.0184	8.95007
Megachilidae	Dianthidium cressonii	Mixed Conifer	72.1094	8.95091
Megachilidae	Dianthidium cressonii	Mixed Conifer	72.1733	8.95112
Megachilidae	Dianthidium cressonii	Mixed Conifer	72.2301	8.95118
Megachilidae	Dianthidium cressonii	Mixed Conifer	72.2328	8.95119
Megachilidae	Dianthidium cressonii	Mixed Conifer	72.3565	8.95119
Megachilidae	Dianthidium cressonii	Mixed Conifer	72.4103	8.95119
Megachilidae	Dianthidium cressonii	Mixed Conifer	72.4428	8.95119
Megachilidae	Dianthidium cressonii	Mixed Conifer	72.4804	8.95119
Megachilidae	Dianthidium cressonii	Mixed Conifer	72.4806	8.95119
Megachilidae	Dianthidium cressonii	Mixed Conifer	72.6033	8.95119
Megachilidae	Dianthidium cressonii	Ponderosa	71.7415	5.5651
Megachilidae	Dianthidium cressonii	Ponderosa	71.8074	5.5651
Megachilidae	Dianthidium cressonii	Ponderosa	71.8638	8.8794
Megachilidae	Dianthidium cressonii	Ponderosa	71.8897	8.8794
Megachilidae	Dianthidium cressonii	Ponderosa	71.9835	8.93325
Megachilidae	Lithurgus apicalis	Ponderosa	87.1233	616.702
Megachilidae	Lithurgus apicalis	Ponderosa	87.0491	618.64
Megachilidae	MEG ASH 003	Ponderosa	87.2008	614.77
Megachilidae	MEG HER 002	Mixed Conifer	93.8264	690.863
Megachilidae	MEG HER 002	Mixed Conifer	93.8399	688.864
Megachilidae	MEG HER 003	Mixed Conifer	93.9633	687.55
Megachilidae	MEG HER 003	Mixed Conifer	94.0386	686.136
Megachilidae	MEG MEG 006	Mixed Conifer	94.0528	686.117
Megachilidae	MEG MEG 006	Mixed Conifer	94.0796	685.381
Megachilidae	MEG MEG 006	Mixed Conifer	94.1845	683.219
Megachilidae	MEG MEG 006	Mixed Conifer	94.1934	682.497
Megachilidae	MEG MEG 006	Mixed Conifer	94.2158	681.606
Megachilidae	MEG MEG 006	Mixed Conifer	94.2353	681.106
Megachilidae	MEG MEG 006	Mixed Conifer	94.2857	680.396
Megachilidae	MEG MEG 006	Mixed Conifer	94.3859	680.298
Megachilidae	MEG MEG 006	Mixed Conifer	94.4016	679.627
Megachilidae	MEG MEG 006	Mixed Conifer	94.4668	679.549
Megachilidae	MEG MEG 006	Mixed Conifer	94.5442	678.157
Megachilidae	MEG MEG 006	Mixed Conifer	94.5526	678.007
Megachilidae	MEG MEG 006	Mixed Conifer	94.5634	677.772
Megachilidae	MEG MEG 006	Mixed Conifer	94.6215	677.109
Megachilidae	MEG MEG 006	Mixed Conifer	94.6865	674.976
Megachilidae	MEG MEG 006	Mixed Conifer	94.715	673.03
Megachilidae	MEG MEG 006	Mixed Conifer	94.7249	672.852
Megachilidae	MEG MEG 006	Mixed Conifer	94.7515	670.734
Megachilidae	MEG MEG 006	Ponderosa	87.6487	607.501
Megachilidae	MEG MEG 006	Ponderosa	87.6033	608.083
Megachilidae	MEG MEG 006	Ponderosa	87.5742	608.669
Megachilidae	MEG MEG 006	Ponderosa	87.5548	609.012
Megachilidae	MEG MEG 006	Ponderosa	87.4998	610.288
Megachilidae	MEG MEG 006	Ponderosa	87.4994	610.926
Megachilidae	MEG MEG 006	Ponderosa	87.4255	611.042
Megachilidae	MEG MEG 006	Ponderosa	87.3514	611.913
Megachilidae	MEG MEG 006	Ponderosa	87.277	612.845
Megachilidae	MEG MEG 006	Ponderosa	87.2063	613.362
Megachilidae	MEG STE 001	Ponderosa	87.7235	607.104
Megachilidae	Megachile comata	Mixed Conifer	94.7957	669.055
Megachilidae	Megachile comata	Mixed Conifer	94.8173	668.654
Megachilidae	Megachile comata	Mixed Conifer	94.8304	666.949
Megachilidae	Megachile comata	Mixed Conifer	94.8578	666.487
Megachilidae	Megachile comata	Mixed Conifer	94.8735	664.994
Megachilidae	Megachile comata	Mixed Conifer	94.8781	662.903
Megachilidae	Megachile comata	Mixed Conifer	94.9158	660.795
Megachilidae	Megachile comata	Mixed Conifer	94.9336	659.922
Megachilidae	Megachile comata	Mixed Conifer	94.9575	658.675
Megachilidae	Megachile comata	Mixed Conifer	94.9846	657.076
Megachilidae	Megachile comata	Ponderosa	87.7439	606.603
Megachilidae	Megachile comata	Ponderosa	87.7418	607.055
Megachilidae	Megachile fidelis	Mixed Conifer	94.9885	656.561
Megachilidae	Megachile fidelis	Mixed Conifer	94.9987	654.5
Megachilidae	Megachile fidelis	Ponderosa	87.8002	605.446
Megachilidae	Megachile fidelis	Ponderosa	87.7979	606.325
Megachilidae	Megachile frigida	Mixed Conifer	95.0392	653.336
Megachilidae	Megachile frigida	Mixed Conifer	95.0431	652.45
Megachilidae	Megachile melanophaea	Mixed Conifer	95.0792	652.264
Megachilidae	Megachile melanophaea	Mixed Conifer	95.0868	650.4
Megachilidae	Megachile mellitarsis	Mixed Conifer	95.0931	648.381
Megachilidae	Megachile mellitarsis	Mixed Conifer	95.0948	646.729
Megachilidae	Megachile mellitarsis	Ponderosa	87.8284	603.842
Megachilidae	Megachile mellitarsis	Ponderosa	87.8073	605.2
Megachilidae	Megachile montivaga	Mixed Conifer	95.1187	646.364
Megachilidae	Megachile montivaga	Mixed Conifer	95.1425	645.631
Megachilidae	Megachile montivaga	Mixed Conifer	95.1576	645.464
Megachilidae	Megachile montivaga	Mixed Conifer	95.1895	645.016
Megachilidae	Megachile montivaga	Mixed Conifer	95.196	644.412
Megachilidae	Megachile montivaga	Mixed Conifer	95.2025	642.389
Megachilidae	Megachile montivaga	Ponderosa	87.8424	602.244
Megachilidae	Megachile relativa	Mixed Conifer	95.21	640.375
Megachilidae	Megachile relativa	Mixed Conifer	95.21	640.1
Megachilidae	Megachile relativa	Mixed Conifer	95.2309	638.368
Megachilidae	Megachile relativa	Mixed Conifer	95.2339	636.366
Megachilidae	Megachile relativa	Mixed Conifer	95.2369	635.299
Megachilidae	Megachile relativa	Mixed Conifer	95.2666	634.41
Megachilidae	Megachile relativa	Mixed Conifer	95.2713	634.371
Megachilidae	Megachile relativa	Mixed Conifer	95.2935	633.45
Megachilidae	Megachile subanograe	Ponderosa	87.8549	600.651
Megachilidae	Osmia brevis	Mixed Conifer	95.3804	321.567
Megachilidae	Osmia brevis	Mixed Conifer	95.3775	324.982
Megachilidae	Osmia bucephala	Mixed Conifer	95.417	301.215
Megachilidae	Osmia bucephala	Mixed Conifer	95.4157	314.754
Megachilidae	Osmia bucephala	Mixed Conifer	95.3986	320.196
Megachilidae	Osmia bucephala	Mixed Conifer	95.3847	320.583
Megachilidae	Osmia juxta	Mixed Conifer	91.2666	346.904
Megachilidae	Osmia juxta	Mixed Conifer	91.2354	349.207
Megachilidae	Osmia juxta	Mixed Conifer	91.2256	350.004
Megachilidae	Osmia juxta	Mixed Conifer	91.2228	351.494
Megachilidae	Osmia juxta	Mixed Conifer	91.2151	352.133
Megachilidae	Osmia juxta	Mixed Conifer	91.1975	354.147
Megachilidae	Osmia juxta	Mixed Conifer	91.1674	354.182
Megachilidae	Osmia juxta	Mixed Conifer	91.1596	355.945
Megachilidae	Osmia juxta	Mixed Conifer	91.1197	355.951
Megachilidae	Osmia juxta	Mixed Conifer	91.109	356.824
Megachilidae	Osmia juxta	Mixed Conifer	91.0783	356.912
Megachilidae	Osmia juxta	Mixed Conifer	91.0504	356.928
Megachilidae	Osmia juxta	Mixed Conifer	91.0358	359.229
Megachilidae	Osmia juxta	Mixed Conifer	91.0032	359.413
Megachilidae	Osmia juxta	Mixed Conifer	90.993	359.678
Megachilidae	Osmia juxta	Mixed Conifer	90.9501	359.878
Megachilidae	Osmia juxta	Mixed Conifer	90.928	361.499
Megachilidae	Osmia juxta	Mixed Conifer	90.928	361.636
Megachilidae	Osmia juxta	Mixed Conifer	90.928	362.578
Megachilidae	Osmia juxta	Mixed Conifer	90.928	363.188
Megachilidae	Osmia juxta	Mixed Conifer	90.9064	363.449
Megachilidae	Osmia juxta	Mixed Conifer	90.9005	363.638
Megachilidae	Osmia juxta	Mixed Conifer	90.8624	364.886
Megachilidae	Osmia juxta	Mixed Conifer	90.8252	365.343
Megachilidae	Osmia juxta	Mixed Conifer	90.8163	365.938
Megachilidae	Osmia juxta	Mixed Conifer	90.7682	366.865
Megachilidae	Osmia juxta	Mixed Conifer	90.7191	368.181
Megachilidae	Osmia juxta	Mixed Conifer	90.6699	370.668
Megachilidae	Osmia juxta	Mixed Conifer	90.62	370.821
Megachilidae	Osmia juxta	Mixed Conifer	90.6041	373.123
Megachilidae	Osmia juxta	Mixed Conifer	90.5679	375.762
Megachilidae	Osmia juxta	Mixed Conifer	90.5152	382.784
Megachilidae	Osmia juxta	Mixed Conifer	90.4792	383.84
Megachilidae	Osmia juxta	Mixed Conifer	90.4621	385.031
Megachilidae	Osmia juxta	Mixed Conifer	90.4452	387.295
Megachilidae	Osmia juxta	Mixed Conifer	90.4087	387.772
Megachilidae	Osmia juxta	Mixed Conifer	90.3022	387.825
Megachilidae	Osmia juxta	Mixed Conifer	90.3554	387.825
Megachilidae	Osmia juxta	Mixed Conifer	90.3783	387.825
Megachilidae	Osmia juxta	Mixed Conifer	90.2491	388.419
Megachilidae	Osmia juxta	Mixed Conifer	90.1947	388.567
Megachilidae	Osmia juxta	Mixed Conifer	90.1402	388.711
Megachilidae	Osmia juxta	Mixed Conifer	90.0857	388.715
Megachilidae	Osmia juxta	Mixed Conifer	90.0555	389.012
Megachilidae	Osmia juxta	Mixed Conifer	90.0313	389.57
Megachilidae	Osmia juxta	Mixed Conifer	90.0021	390.367
Megachilidae	Osmia juxta	Mixed Conifer	89.9771	392.679
Megachilidae	Osmia juxta	Mixed Conifer	89.9516	392.873
Megachilidae	Osmia juxta	Mixed Conifer	89.9351	393.219
Megachilidae	Osmia juxta	Mixed Conifer	89.9228	395.855
Megachilidae	Osmia juxta	Mixed Conifer	89.883	396.725
Megachilidae	Osmia juxta	Mixed Conifer	89.8683	397.813
Megachilidae	Osmia juxta	Mixed Conifer	89.8137	400.486
Megachilidae	Osmia juxta	Mixed Conifer	89.7592	402.068
Megachilidae	Osmia juxta	Mixed Conifer	89.7047	402.52
Megachilidae	Osmia juxta	Mixed Conifer	89.6497	403.453
Megachilidae	Osmia juxta	Mixed Conifer	89.5946	403.55
Megachilidae	Osmia juxta	Mixed Conifer	89.5881	407.281
Megachilidae	Osmia juxta	Mixed Conifer	89.5392	408.437
Megachilidae	Osmia juxta	Mixed Conifer	89.515	413.343
Megachilidae	Osmia juxta	Mixed Conifer	89.4837	413.395
Megachilidae	Osmia juxta	Mixed Conifer	89.4277	418.526
Megachilidae	Osmia juxta	Mixed Conifer	89.3713	423.731
Megachilidae	Osmia juxta	Mixed Conifer	89.3147	430.349
Megachilidae	Osmia juxta	Mixed Conifer	89.2564	430.939
Megachilidae	Osmia juxta	Mixed Conifer	89.1965	431.519
Megachilidae	Osmia juxta	Mixed Conifer	89.1735	432
Megachilidae	Osmia juxta	Mixed Conifer	91.2836	443.446
Megachilidae	Osmia juxta	Mixed Conifer	91.2728	451.706
Megachilidae	Osmia juxta	Mixed Conifer	89.1363	533.594
Megachilidae	Osmia juxta	Mixed Conifer	89.0749	534.74
Megachilidae	Osmia juxta	Mixed Conifer	89.0136	538.656
Megachilidae	Osmia juxta	Mixed Conifer	89.0005	544.484
Megachilidae	Osmia juxta	Mixed Conifer	88.9524	549.713
Megachilidae	Osmia juxta	Mixed Conifer	88.8999	555.632
Megachilidae	Osmia juxta	Mixed Conifer	88.8912	559.219
Megachilidae	Osmia juxta	Mixed Conifer	88.83	560.211
Megachilidae	Osmia juxta	Mixed Conifer	88.8156	560.368
Megachilidae	Osmia juxta	Mixed Conifer	88.7683	560.587
Megachilidae	Osmia juxta	Mixed Conifer	88.7313	560.78
Megachilidae	Osmia juxta	Mixed Conifer	88.7115	560.855
Megachilidae	Osmia juxta	Mixed Conifer	88.7058	560.908
Megachilidae	Osmia juxta	Mixed Conifer	88.6415	561.008
Megachilidae	Osmia juxta	Mixed Conifer	88.5769	561.061
Megachilidae	Osmia juxta	Mixed Conifer	88.5114	561.291
Megachilidae	Osmia juxta	Mixed Conifer	88.4992	561.373
Megachilidae	Osmia juxta	Mixed Conifer	88.476	561.419
Megachilidae	Osmia juxta	Mixed Conifer	88.4458	561.451
Megachilidae	Osmia juxta	Mixed Conifer	88.4344	561.586
Megachilidae	Osmia juxta	Mixed Conifer	88.3783	561.604
Megachilidae	Osmia juxta	Mixed Conifer	88.3293	561.636
Megachilidae	Osmia juxta	Mixed Conifer	88.3087	561.783
Megachilidae	Osmia juxta	Mixed Conifer	88.237	561.79
Megachilidae	Osmia juxta	Mixed Conifer	88.1655	561.999
Megachilidae	Osmia juxta	Ponderosa	88.1574	287.575
Megachilidae	Osmia juxta	Ponderosa	88.0929	288.391
Megachilidae	Osmia juxta	Ponderosa	88.0881	288.401
Megachilidae	Osmia juxta	Ponderosa	88.0448	288.411
Megachilidae	Osmia juxta	Ponderosa	88.02	288.43
Megachilidae	Osmia juxta	Ponderosa	88.0188	288.508
Megachilidae	Osmia juxta	Ponderosa	88.0015	288.819
Megachilidae	Osmia juxta	Ponderosa	87.9907	290.064
Megachilidae	Osmia juxta	Ponderosa	87.9842	293.801
Megachilidae	Osmia juxta	Ponderosa	87.9839	295.042
Megachilidae	Osmia juxta	Ponderosa	87.9816	295.157
Megachilidae	Osmia juxta	Ponderosa	87.9799	297.683
Megachilidae	Osmia juxta	Spruce-fir	109.384	484.369
Megachilidae	Osmia juxta	Spruce-fir	109.384	487.995
Megachilidae	Osmia juxta	Spruce-fir	109.292	489.821
Megachilidae	Osmia juxta	Spruce-fir	109.292	495.762
Megachilidae	Osmia juxta	Spruce-fir	109.254	500.083
Megachilidae	Osmia juxta	Spruce-fir	109.235	503.98
Megachilidae	Osmia juxta	Spruce-fir	109.216	504.988
Megachilidae	Osmia juxta	Spruce-fir	109.2	511.177
Megachilidae	Osmia juxta	Spruce-fir	109.2	513.446
Megachilidae	Osmia juxta	Spruce-fir	109.178	519.767
Megachilidae	Osmia juxta	Spruce-fir	109.163	520.446
Megachilidae	Osmia juxta	Spruce-fir	109.155	524.615
Megachilidae	Osmia juxta	Spruce-fir	109.149	526.907
Megachilidae	Osmia juxta	Spruce-fir	109.143	527.253
Megachilidae	Osmia texana	Ponderosa	91.7609	478.448
Megachilidae	Osmia texana	Spruce-fir	113.053	456.66
Megachilidae	Osmia texana	Spruce-fir	113.053	457.957
Megachilidae	Osmia texana	Spruce-fir	113.053	460.102
Megachilidae	Osmia texana	Spruce-fir	110.118	461.244
Megachilidae	Osmia texana	Spruce-fir	110.118	469.729
Megachilidae	Osmia texana	Spruce-fir	109.751	470.329

## Sheet: flies
family	scientificName	habitat	Dakness	Volume
Anthomyiidae	ANT 001	Mixed Conifer	58.158	69.1457
Anthomyiidae	ANT 001	Mixed Conifer	102.313	10.4663
Anthomyiidae	ANT 001	Mixed Conifer	86.674	27.0131
Anthomyiidae	ANT 001	Mixed Conifer	70.673	17.6498
Anthomyiidae	ANT 001	Mixed Conifer	122.98	2.61699
Anthomyiidae	ANT 001	Mixed Conifer	116.335	5.35198
Anthomyiidae	ANT 001	Ponderosa	114.604	18.0867
Anthomyiidae	ANT 001	Spruce-fir	54.032	93.8409
Anthomyiidae	ANT 001	Spruce-fir	54.153	106.06
Anthomyiidae	ANT 001	Spruce-fir	63.639	14.8277
Anthomyiidae	ANT 001	Spruce-fir	82.3817	35.5417
Anthomyiidae	ANT 001	Spruce-fir	86.5533	18.3764
Anthomyiidae	ANT 002	Mixed Conifer	93.4423	15.76
Anthomyiidae	ANT 002	Ponderosa	103.329	8.5396
Anthomyiidae	ANT 002	Spruce-fir	117.973	8.68522
Anthomyiidae	ANT 002	Spruce-fir	94.9903	39.0932
Anthomyiidae	ANT 002	Spruce-fir	74.263	72.6624
Anthomyiidae	ANT 002	Spruce-fir	57.2747	71.576
Anthomyiidae	ANT 002	Spruce-fir	66.7246	52.143
Anthomyiidae	ANT 002	Spruce-fir	77.5247	22.9153
Anthomyiidae	ANT 002	Spruce-fir	87.4591	23.226
Anthomyiidae	ANT 002	Spruce-fir	94.4417	14.2253
Anthomyiidae	ANT 002	Spruce-fir	104.915	10.9949

## Sheet: bees
family	scientificName	habitat	Dakness	Volume
Andrenidae	AND ANC 001	Ponderosa	61.6469	8.96017
Andrenidae	AND ANC 001	Ponderosa	61.7137	8.98709
Andrenidae	AND PER 001	Ponderosa	62.128	9.67173
Andrenidae	Andrena crinita	Mixed Conifer	62.1648	8.9512
Andrenidae	Andrena crinita	Mixed Conifer	62.6001	8.9512
Andrenidae	Andrena crinita	Mixed Conifer	62.628	8.95123
Andrenidae	Andrena crinita	Mixed Conifer	62.6982	8.95133
Andrenidae	Andrena crinita	Mixed Conifer	63.057	8.95176
Andrenidae	Andrena crinita	Mixed Conifer	63.1892	8.95344
Andrenidae	Andrena medionitens	Mixed Conifer	63.2346	12.0487
Andrenidae	Andrena medionitens	Mixed Conifer	63.2346	13.7745
Apidae	Anthophora montana	Mixed Conifer	32.5974	210.019
Apidae	Anthophora montana	Mixed Conifer	33.735	210.082
Apidae	Anthophora montana	Mixed Conifer	33.735	210.137
Apidae	Anthophora montana	Mixed Conifer	33.735	210.193
Apidae	Anthophora montana	Mixed Conifer	34.398	210.207
Apidae	Anthophora montana	Mixed Conifer	34.582	210.215
Apidae	Anthophora montana	Mixed Conifer	35.39	210.22
Apidae	Anthophora montana	Mixed Conifer	35.9693	210.224
Apidae	Anthophora montana	Mixed Conifer	36.0888	210.226
Apidae	Anthophora montana	Mixed Conifer	36.196	210.227
Apidae	Anthophora montana	Mixed Conifer	36.4318	210.227
Apidae	Anthophora montana	Mixed Conifer	36.779	210.228
Apidae	Anthophora montana	Mixed Conifer	37.676	210.229
Apidae	Anthophora montana	Mixed Conifer	37.676	210.229
Apidae	Anthophora montana	Mixed Conifer	37.936	210.23
Apidae	Anthophora montana	Mixed Conifer	38.0975	210.231
Apidae	Anthophora montana	Mixed Conifer	38.645	210.231
Apidae	Anthophora montana	Mixed Conifer	39.3976	210.231
Apidae	Anthophora montana	Mixed Conifer	40.7008	210.232
Apidae	Anthophora montana	Mixed Conifer	40.8511	210.232
Apidae	Anthophora montana	Mixed Conifer	40.9103	210.232
Apidae	Anthophora montana	Mixed Conifer	40.996	210.233
Apidae	Anthophora montana	Mixed Conifer	41.1433	210.233
Apidae	Anthophora montana	Mixed Conifer	41.1677	210.234
Apidae	Anthophora montana	Mixed Conifer	41.1745	210.234
Apidae	Anthophora montana	Mixed Conifer	41.1767	210.234
Apidae	Anthophora montana	Mixed Conifer	41.1807	210.234
Apidae	Anthophora montana	Mixed Conifer	41.1821	210.235
Apidae	Anthophora montana	Ponderosa	21.995	202.72
Apidae	Anthophora montana	Ponderosa	21.995	202.726
Apidae	Anthophora montana	Ponderosa	21.995	202.793
Apidae	Anthophora montana	Ponderosa	24.522	203.277
Apidae	Anthophora montana	Ponderosa	27.617	203.751
Apidae	Anthophora montana	Ponderosa	27.617	203.83
Apidae	Anthophora montana	Ponderosa	29.193	204.384
Apidae	Anthophora montana	Ponderosa	29.193	204.572
Apidae	Anthophora montana	Ponderosa	29.193	204.714
Apidae	Anthophora montana	Ponderosa	30.764	204.94
Apidae	Anthophora montana	Ponderosa	30.764	205.256
Apidae	Anthophora montana	Ponderosa	30.764	205.497
Apidae	Anthophora montana	Ponderosa	30.764	205.682
Apidae	Anthophora montana	Ponderosa	31.0793	206.057
Apidae	Anthophora montana	Ponderosa	31.0793	206.618
Apidae	Anthophora montana	Ponderosa	31.0793	206.655
Apidae	Anthophora montana	Ponderosa	31.0793	207.18
Apidae	Anthophora montana	Ponderosa	31.1379	207.251
Apidae	Anthophora montana	Ponderosa	31.1379	207.633
Apidae	Anthophora montana	Ponderosa	31.1379	207.745
Apidae	Anthophora montana	Ponderosa	31.1477	208.311
Apidae	Anthophora montana	Ponderosa	31.1479	208.617
Apidae	Anthophora montana	Ponderosa	31.1484	208.878
Apidae	Anthophora montana	Ponderosa	31.1484	209.448
Apidae	Anthophora montana	Ponderosa	31.1492	209.605
Apidae	Anthophora montana	Ponderosa	31.1495	209.639
Apidae	Anthophora montana	Ponderosa	31.1495	209.639
Apidae	Anthophora montana	Ponderosa	31.1496	209.639
Apidae	Anthophora montana	Ponderosa	31.1497	209.639
Apidae	Anthophora montana	Ponderosa	31.1497	209.968
Apidae	Anthophora terminalis	Mixed Conifer	31.5923	210.246
Apidae	Anthophora terminalis	Mixed Conifer	31.849	210.247
Apidae	Anthophora terminalis	Mixed Conifer	31.849	210.247
Apidae	Anthophora terminalis	Mixed Conifer	31.849	210.247
Apidae	Anthophora terminalis	Mixed Conifer	41.1835	210.247
Apidae	Anthophora terminalis	Mixed Conifer	41.1836	210.247
Apidae	Anthophora terminalis	Mixed Conifer	41.1842	210.248
Apidae	Anthophora terminalis	Mixed Conifer	41.1843	210.248
Apidae	Anthophora terminalis	Mixed Conifer	41.1845	210.248
Apidae	Anthophora terminalis	Mixed Conifer	41.1845	210.248
Apidae	Anthophora terminalis	Mixed Conifer	41.1845	210.249
Apidae	Anthophora terminalis	Mixed Conifer	41.1848	210.25
Apidae	Anthophora terminalis	Mixed Conifer	41.1851	210.251
Apidae	Anthophora terminalis	Mixed Conifer	41.1856	210.252
Apidae	Anthophora terminalis	Mixed Conifer	41.1911	210.253
Apidae	Anthophora terminalis	Mixed Conifer	41.1954	210.253
Apidae	Anthophora terminalis	Mixed Conifer	41.2035	210.253
Apidae	Anthophora terminalis	Mixed Conifer	41.2662	210.256
Apidae	Anthophora terminalis	Mixed Conifer	41.3663	210.259
Apidae	Anthophora terminalis	Mixed Conifer	41.4361	210.263
Apidae	Anthophora terminalis	Mixed Conifer	41.6776	210.264
Apidae	Anthophora terminalis	Mixed Conifer	42.547	210.275
Apidae	Anthophora terminalis	Mixed Conifer	42.998	210.276
Apidae	Anthophora terminalis	Mixed Conifer	43.214	210.304
Apidae	Anthophora terminalis	Mixed Conifer	44.8667	210.361
Apidae	Anthophora terminalis	Mixed Conifer	45.4724	210.361
Apidae	Anthophora terminalis	Mixed Conifer	45.998	210.414
Apidae	Anthophora terminalis	Mixed Conifer	50.5821	210.497
Apidae	Anthophora terminalis	Mixed Conifer	53.9476	210.523
Apidae	Anthophora terminalis	Mixed Conifer	55.854	210.525
Apidae	Anthophora terminalis	Mixed Conifer	55.991	210.529
Apidae	Anthophora terminalis	Mixed Conifer	56.4353	210.543
Apidae	Anthophora terminalis	Mixed Conifer	56.605	210.592
Apidae	Anthophora terminalis	Mixed Conifer	56.8664	210.599
Apidae	Anthophora terminalis	Mixed Conifer	57.3191	210.602
Apidae	Anthophora terminalis	Mixed Conifer	57.461	210.624
Apidae	Anthophora terminalis	Mixed Conifer	57.9771	210.624
Apidae	Anthophora terminalis	Mixed Conifer	58.4894	211.657
Apidae	Anthophora terminalis	Ponderosa	31.1497	210.235
Apidae	Anthophora terminalis	Ponderosa	31.1497	210.235
Apidae	Anthophora terminalis	Ponderosa	31.1497	210.236
Apidae	Anthophora terminalis	Ponderosa	31.15	210.236
Apidae	Anthophora terminalis	Ponderosa	31.15	210.237
Apidae	Anthophora terminalis	Ponderosa	31.15	210.237
Apidae	Anthophora terminalis	Ponderosa	31.15	210.237
Apidae	Anthophora terminalis	Ponderosa	31.1513	210.237
Apidae	Anthophora terminalis	Ponderosa	31.1574	210.237
Apidae	Anthophora terminalis	Ponderosa	31.1574	210.238
Apidae	Anthophora terminalis	Ponderosa	31.1574	210.238
Apidae	Anthophora terminalis	Ponderosa	31.1574	210.238
Apidae	Anthophora terminalis	Ponderosa	31.1844	210.239
Apidae	Anthophora terminalis	Ponderosa	31.1844	210.239
Apidae	Anthophora terminalis	Ponderosa	31.1844	210.24
Apidae	Anthophora terminalis	Ponderosa	31.1844	210.241
Apidae	Anthophora terminalis	Ponderosa	31.1862	210.241
Apidae	Anthophora terminalis	Ponderosa	31.1862	210.241
Apidae	Anthophora terminalis	Ponderosa	31.1862	210.241
Apidae	Anthophora terminalis	Ponderosa	31.1862	210.242
Apidae	Anthophora terminalis	Ponderosa	31.2877	210.243
Apidae	Anthophora terminalis	Ponderosa	31.2877	210.243
Apidae	Anthophora terminalis	Ponderosa	31.2877	210.243
Apidae	Anthophora terminalis	Ponderosa	31.2877	210.243
Apidae	Anthophora terminalis	Ponderosa	31.5068	210.243
Apidae	Anthophora terminalis	Ponderosa	31.5068	210.244
Apidae	Anthophora terminalis	Ponderosa	31.5068	210.245
Apidae	Anthophora terminalis	Ponderosa	31.5923	210.245
Apidae	Anthophora terminalis	Ponderosa	31.5923	210.246
Apidae	Anthophora terminalis	Spruce-fir	58.5053	211.663
Apidae	Anthophora terminalis	Spruce-fir	58.5053	211.669
Apidae	Anthophora terminalis	Spruce-fir	59.6969	211.677
Apidae	Anthophora terminalis	Spruce-fir	59.7837	211.684
Apidae	Anthophora terminalis	Spruce-fir	60.177	211.691
Apidae	Anthophora terminalis	Spruce-fir	60.628	211.699
Apidae	Anthophora terminalis	Spruce-fir	60.892	211.706
Apidae	Anthophora terminalis	Spruce-fir	60.9046	211.714
Apidae	Anthophora terminalis	Spruce-fir	61.542	211.721
Apidae	Anthophora terminalis	Spruce-fir	61.5946	574.25
Apidae	Anthophora urbana	Mixed Conifer	64.3378	574.342
Apidae	Anthophora urbana	Mixed Conifer	64.341	574.475
Apidae	Anthophora urbana	Ponderosa	63.7474	225.033
Apidae	Anthophora urbana	Ponderosa	63.9731	225.304
Apidae	Anthophora ursina	Ponderosa	61.628	225.415
Apidae	API EUCE 001	Ponderosa	65.3315	585.898
Apidae	API EUCE 002	Mixed Conifer	64.544	730.128
Apidae	API EUCE 002	Mixed Conifer	64.544	729.622
Apidae	API EUCE 002	Mixed Conifer	64.5647	728.743
Apidae	API EUCE 002	Mixed Conifer	64.628	714.957
Apidae	API EUCE 002	Mixed Conifer	64.628	714.929
Apidae	API EUCE 002	Mixed Conifer	64.628	714.713
Apidae	API EUCE 002	Mixed Conifer	65.4484	713.655
Apidae	API EUCE 002	Mixed Conifer	65.5289	712.81
Apidae	API EUCE 002	Spruce-fir	66.8667	733.854
Apidae	API EUCE 002	Spruce-fir	66.8347	734.322
Apidae	API EUCE 003	Spruce-fir	67.2094	732.781
Apidae	API EUCE 003	Spruce-fir	67.0216	733.446
Apidae	API EUCE 004	Spruce-fir	67.3982	731.929
Apidae	API MELI 003	Mixed Conifer	67.588	712.601
Apidae	API MELI 003	Mixed Conifer	67.7788	712.492
Apidae	API MELI 003	Mixed Conifer	67.9706	711.958
Apidae	API MELI 003	Mixed Conifer	68.1634	711.705
Apidae	API MELI 003	Mixed Conifer	68.2225	711.62
Apidae	API MELI 003	Mixed Conifer	68.336	711.541
Apidae	API MELI 003	Mixed Conifer	68.3572	710.438
Apidae	API MELI 003	Mixed Conifer	68.552	708.201
Apidae	API MELI 003	Ponderosa	67.6107	584.605
Apidae	API MELI 003	Ponderosa	66.0942	584.619
Apidae	API MELI 003	Ponderosa	65.9103	584.713
Apidae	API MELI 003	Ponderosa	65.7499	584.999
Apidae	API MELI 003	Ponderosa	65.7191	585.871
Apidae	API MELI 003	Ponderosa	65.548	585.878
Apidae	API TET 001	Mixed Conifer	68.651	705.977
Apidae	API TET 001	Mixed Conifer	68.6782	705.971
Apidae	API TET 001	Mixed Conifer	68.7479	705.738
Apidae	API TET 001	Mixed Conifer	68.8493	704.819
Apidae	Apis mellifera	Mixed Conifer	68.9448	583.462
Apidae	Apis mellifera	Mixed Conifer	69.0055	584.557
Apidae	ARP TRI 001	Mixed Conifer	71.5975	703.576
Apidae	ARP TRI 001	Mixed Conifer	71.6196	703.54
Apidae	Bombus appositus	Mixed Conifer	75.686	734.601
Apidae	Bombus appositus	Mixed Conifer	75.7283	740.097
Apidae	Bombus appositus	Mixed Conifer	75.8323	740.525
Apidae	Bombus appositus	Mixed Conifer	75.8666	740.57
Apidae	Bombus appositus	Mixed Conifer	75.9367	740.771
Apidae	Bombus appositus	Mixed Conifer	75.9575	740.807
Apidae	Bombus appositus	Mixed Conifer	76.0414	740.831
Apidae	Bombus appositus	Mixed Conifer	76.0482	741.044
Apidae	Bombus appositus	Mixed Conifer	76.1464	741.108
Apidae	Bombus appositus	Mixed Conifer	76.2308	741.119
Apidae	Bombus appositus	Spruce-fir	76.3573	1011.37
Apidae	Bombus appositus	Spruce-fir	76.2517	1012.11
Apidae	Bombus bifarius	Mixed Conifer	84.1715	741.666
Apidae	Bombus bifarius	Mixed Conifer	84.2829	741.741
Apidae	Bombus bifarius	Mixed Conifer	84.3211	742.153
Apidae	Bombus bifarius	Mixed Conifer	84.467	742.366
Apidae	Bombus centralis	Mixed Conifer	84.5723	742.531
Apidae	Bombus centralis	Mixed Conifer	84.6059	742.785
Apidae	Bombus centralis	Mixed Conifer	84.6469	743.456
Apidae	Bombus centralis	Mixed Conifer	84.6883	743.5
Apidae	Bombus centralis	Mixed Conifer	84.7349	743.621
Apidae	Bombus centralis	Mixed Conifer	84.8624	743.628
Apidae	Bombus centralis	Mixed Conifer	84.8757	744.439
Apidae	Bombus centralis	Mixed Conifer	84.9737	744.894
Apidae	Bombus centralis	Mixed Conifer	85.0744	745.085
Apidae	Bombus centralis	Mixed Conifer	85.1688	745.198
Apidae	Bombus centralis	Spruce-fir	91.4556	993.136
Apidae	Bombus centralis	Spruce-fir	91.4197	994.341
Apidae	Bombus centralis	Spruce-fir	91.399	996.368
Apidae	Bombus centralis	Spruce-fir	91.3833	997.486
Apidae	Bombus centralis	Spruce-fir	91.3468	998.741
Apidae	Bombus centralis	Spruce-fir	91.3444	1001.43
Apidae	Bombus centralis	Spruce-fir	91.3414	1002.89
Apidae	Bombus centralis	Spruce-fir	91.31	1003.95
Apidae	Bombus centralis	Spruce-fir	85.1693	1005.24
Apidae	Bombus centralis	Spruce-fir	91.4564	1010.54
Apidae	Bombus fervidus	Mixed Conifer	91.5258	963.769
Apidae	Bombus fervidus	Mixed Conifer	91.5253	1006.37
Apidae	Bombus fervidus	Mixed Conifer	91.5136	1007.64
Apidae	Bombus fervidus	Mixed Conifer	91.4907	1009.97
Apidae	Bombus huntii	Mixed Conifer	78.08	745.24
Apidae	Bombus huntii	Mixed Conifer	77.9746	747.848
Apidae	Bombus huntii	Mixed Conifer	77.9466	750.263
Apidae	Bombus huntii	Mixed Conifer	77.9173	754.59
Apidae	Bombus huntii	Mixed Conifer	77.8683	758.206
Apidae	Bombus huntii	Mixed Conifer	77.8376	758.435
Apidae	Bombus huntii	Mixed Conifer	77.7588	769.023
Apidae	Bombus huntii	Mixed Conifer	77.7261	779.496
Apidae	Bombus huntii	Mixed Conifer	77.726	782.03
Apidae	Bombus huntii	Mixed Conifer	77.6496	782.922
Apidae	Bombus huntii	Mixed Conifer	77.5403	789.82
Apidae	Bombus huntii	Mixed Conifer	77.5357	794.615
Apidae	Bombus huntii	Mixed Conifer	77.4502	800.988
Apidae	Bombus huntii	Mixed Conifer	77.4312	818.778
Apidae	Bombus huntii	Mixed Conifer	77.384	825.224
Apidae	Bombus huntii	Mixed Conifer	77.3463	828.726
Apidae	Bombus huntii	Mixed Conifer	77.3224	828.827
Apidae	Bombus huntii	Mixed Conifer	77.3139	850.747
Apidae	Bombus huntii	Mixed Conifer	77.2139	858.932
Apidae	Bombus huntii	Mixed Conifer	77.158	875.31
Apidae	Bombus huntii	Mixed Conifer	77.1057	892.178
Apidae	Bombus huntii	Mixed Conifer	76.9978	902.462
Apidae	Bombus huntii	Mixed Conifer	76.9706	918.103
Apidae	Bombus huntii	Mixed Conifer	76.8903	922.569
Apidae	Bombus huntii	Mixed Conifer	76.7842	926.131
Apidae	Bombus huntii	Mixed Conifer	76.783	932.359
Apidae	Bombus huntii	Mixed Conifer	76.6761	942.59
Apidae	Bombus huntii	Mixed Conifer	76.612	943.162
Apidae	Bombus huntii	Mixed Conifer	76.5988	944.479
Apidae	Bombus huntii	Mixed Conifer	76.5695	948.547
Apidae	Bombus huntii	Mixed Conifer	76.4633	952.251
Apidae	Bombus huntii	Mixed Conifer	76.4143	956.158
Apidae	Bombus huntii	Mixed Conifer	76.4045	956.234
Apidae	Bombus huntii	Mixed Conifer	76.4045	957.464
Apidae	Bombus huntii	Ponderosa	66.4635	720.353
Apidae	Bombus huntii	Ponderosa	66.2792	720.937
Apidae	Bombus huntii	Ponderosa	66.1387	723.213
Apidae	Bombus huntii	Ponderosa	66.1369	723.48
Apidae	Bombus huntii	Spruce-fir	80.1492	986.083
Apidae	Bombus huntii	Spruce-fir	80.1303	986.201
Apidae	Bombus huntii	Spruce-fir	80.1281	986.308
Apidae	Bombus huntii	Spruce-fir	80.1274	1787.14
Apidae	Bombus huntii	Spruce-fir	80.0904	1989.39
Apidae	Bombus huntii	Spruce-fir	80.0819	1991.84
Apidae	Bombus huntii	Spruce-fir	80.0583	2992.08
Apidae	Bombus huntii	Spruce-fir	80.05	1993.05
Apidae	Bombus melanopygus	Mixed Conifer	74.2498	978.991
Apidae	Bombus melanopygus	Mixed Conifer	74.1224	980.061
Apidae	Bombus melanopygus	Mixed Conifer	74.0954	982.56
Apidae	Bombus melanopygus	Mixed Conifer	74.0952	984.098
Apidae	Bombus morrisoni	Mixed Conifer	74.3005	976.971
Apidae	Bombus morrisoni	Mixed Conifer	74.2698	978.412
Apidae	Bombus nevadensis	Mixed Conifer	80.0342	736.06
Apidae	Bombus nevadensis	Mixed Conifer	80.0095	736.655
Apidae	Bombus nevadensis	Mixed Conifer	80.0094	737.059
Apidae	Bombus nevadensis	Mixed Conifer	79.9842	737.2
Apidae	Bombus nevadensis	Mixed Conifer	79.9724	737.242
Apidae	Bombus nevadensis	Mixed Conifer	79.9685	738.402
Apidae	Bombus nevadensis	Ponderosa	64.9566	738.768
Apidae	Bombus nevadensis	Ponderosa	64.9246	738.912
Apidae	Bombus nevadensis	Ponderosa	64.811	739.189
Apidae	Bombus nevadensis	Ponderosa	64.811	739.336
Apidae	Bombus nevadensis	Ponderosa	64.7025	739.598
Apidae	Bombus nevadensis	Ponderosa	66.6487	739.728
Apidae	Bombus nevadensis	Spruce-fir	80.0392	735.362
Apidae	Bombus nevadensis	Spruce-fir	80.037	735.938
Apidae	Bombus occidentalis	Mixed Conifer	64.9725	716.468
Apidae	Bombus occidentalis	Mixed Conifer	58.8751	716.94
Apidae	Bombus occidentalis	Mixed Conifer	52.855	718.784
Apidae	Bombus occidentalis	Mixed Conifer	74.855	719.859
Apidae	Bombus occidentalis	Mixed Conifer	54.7964	724.252
Apidae	Bombus occidentalis	Mixed Conifer	64.7515	725.075
Apidae	Bombus occidentalis	Mixed Conifer	74.6284	725.497
Apidae	Bombus occidentalis	Mixed Conifer	54.6203	726.004
Apidae	Bombus occidentalis	Mixed Conifer	58.5148	726.098
Apidae	Bombus occidentalis	Mixed Conifer	74.5056	726.453
Apidae	Bombus occidentalis	Mixed Conifer	71.3447	726.915
Apidae	Bombus occidentalis	Mixed Conifer	73.9947	735.32
Apidae	Bombus occidentalis	Spruce-fir	75.2101	973.795
Apidae	Bombus occidentalis	Spruce-fir	75.1495	974.096
Apidae	Bombus occidentalis	Spruce-fir	75.1065	974.361
Apidae	Bombus occidentalis	Spruce-fir	74.997	975.203
Apidae	Diadasia australis	Mixed Conifer	87.9655	10.0679
Apidae	Diadasia australis	Mixed Conifer	87.9669	10.4641
Apidae	Diadasia australis	Mixed Conifer	87.967	11.5429
Apidae	Diadasia australis	Mixed Conifer	87.9691	13.7745
Apidae	Diadasia australis	Ponderosa	70.076	9.86982
Apidae	Diadasia australis	Spruce-fir	87.9756	113.774
Apidae	Diadasia australis	Spruce-fir	87.9772	117.386
Apidae	Diadasia diminuta	Mixed Conifer	97.3025	119.583
Apidae	Diadasia diminuta	Mixed Conifer	97.4414	119.583
Apidae	Diadasia diminuta	Ponderosa	91.5598	117.386
Apidae	Diadasia diminuta	Ponderosa	91.5653	117.918
Apidae	Diadasia diminuta	Ponderosa	91.5707	118.564
Apidae	Diadasia diminuta	Ponderosa	91.5937	118.564
Apidae	Diadasia diminuta	Ponderosa	91.6145	118.564
Apidae	Diadasia diminuta	Ponderosa	93.2575	118.734
Apidae	Diadasia diminuta	Ponderosa	93.2603	118.815
Apidae	Diadasia diminuta	Ponderosa	93.2617	118.874
Apidae	Diadasia diminuta	Ponderosa	93.264	118.891
Apidae	Diadasia diminuta	Ponderosa	93.2647	118.984
Apidae	Diadasia diminuta	Ponderosa	93.2674	119.201
Apidae	Diadasia diminuta	Ponderosa	93.2678	119.201
Apidae	Diadasia diminuta	Spruce-fir	97.6095	119.583
Apidae	Diadasia diminuta	Spruce-fir	97.6303	119.583
Apidae	Diadasia rinconis	Mixed Conifer	100.043	211.621
Apidae	Diadasia rinconis	Mixed Conifer	101.312	211.626
Apidae	Diadasia rinconis	Mixed Conifer	101.312	211.632
Apidae	Diadasia rinconis	Mixed Conifer	101.312	211.637
Apidae	Diadasia rinconis	Mixed Conifer	107.183	211.643
Apidae	Diadasia rinconis	Mixed Conifer	107.183	211.65
Apidae	Diadasia rinconis	Ponderosa	98	210.679
Apidae	Diadasia rinconis	Ponderosa	98	210.699
Apidae	Diadasia rinconis	Ponderosa	98.0001	210.718
Apidae	Diadasia rinconis	Ponderosa	98.0003	210.821
Apidae	Diadasia rinconis	Ponderosa	98.0014	210.821
Apidae	Diadasia rinconis	Ponderosa	98.0054	210.91
Apidae	Diadasia rinconis	Ponderosa	98.0218	211.166
Apidae	Diadasia rinconis	Ponderosa	98.0515	211.205
Apidae	Diadasia rinconis	Ponderosa	98.0872	211.412
Apidae	Diadasia rinconis	Ponderosa	98.1017	211.412
Apidae	Diadasia rinconis	Ponderosa	98.3487	211.412
Apidae	Diadasia rinconis	Ponderosa	98.571	211.412
Apidae	Diadasia rinconis	Ponderosa	98.683	211.412
Apidae	Diadasia rinconis	Ponderosa	98.683	211.597
Apidae	Diadasia rinconis	Ponderosa	98.8149	211.6
Apidae	Diadasia rinconis	Ponderosa	98.9871	211.601
Apidae	Diadasia rinconis	Ponderosa	99.0873	211.602
Apidae	Diadasia rinconis	Ponderosa	99.1261	211.604
Apidae	Diadasia rinconis	Ponderosa	99.2456	211.606
Apidae	Diadasia rinconis	Ponderosa	99.395	211.61
Apidae	Diadasia rinconis	Ponderosa	99.5784	211.615
Apidae	Melissodes confusus	Ponderosa	87.8565	600.094
Apidae	Melissodes gilensis	Mixed Conifer	95.2981	632.382
Apidae	Melissodes gilensis	Mixed Conifer	95.3082	630.4
Apidae	Melissodes gilensis	Mixed Conifer	95.3258	628.424
Apidae	Melissodes gilensis	Mixed Conifer	95.3446	626.777
Apidae	Melissodes gilensis	Ponderosa	87.8822	587.325
Apidae	Melissodes gilensis	Ponderosa	87.881	587.438
Apidae	Melissodes gilensis	Ponderosa	87.8803	587.862
Apidae	Melissodes gilensis	Ponderosa	87.8768	588.089
Apidae	Melissodes gilensis	Ponderosa	87.8725	588.746
Apidae	Melissodes gilensis	Ponderosa	87.8702	588.894
Apidae	Melissodes gilensis	Ponderosa	87.8654	589.077
Apidae	Melissodes gilensis	Ponderosa	87.8625	599.216
Apidae	Melissodes gilensis	Ponderosa	87.8587	599.479
Apidae	Melissodes glenwoodensis	Ponderosa	87.8869	345.748
Apidae	Melissodes glenwoodensis	Ponderosa	87.8856	585.927
Apidae	Melissodes glenwoodensis	Ponderosa	87.8852	586.541
Apidae	Melissodes glenwoodensis	Ponderosa	87.8849	587.206
Apidae	Melissodes glenwoodensis	Ponderosa	87.8825	587.248
Apidae	Melissodes rivalis	Ponderosa	87.8967	333.253
Apidae	Melissodes rivalis	Ponderosa	87.8932	335.041
Apidae	Melissodes rivalis	Ponderosa	87.8894	336.495
Apidae	Melissodes rivalis	Ponderosa	87.8873	343.735
Apidae	Melissodes tristis	Mixed Conifer	95.374	327.739
Apidae	Melissodes tristis	Mixed Conifer	95.3529	330.149
Colletidae	COL COL 001	Spruce-fir	74.3775	226.668
Colletidae	COL COL 001	Spruce-fir	73.971	226.86
Colletidae	COL COL 002	Mixed Conifer	70.0283	227.349
Colletidae	COL COL 002	Mixed Conifer	70.0651	227.419
Colletidae	COL COL 002	Mixed Conifer	73.9099	589.641
Colletidae	COL COL 002	Mixed Conifer	73.9108	590.382
Colletidae	COL COL 002	Ponderosa	69.996	226.939
Colletidae	COL COL 002	Ponderosa	69.996	227.197
Colletidae	COL COL 002	Spruce-fir	73.9193	590.597
Colletidae	COL COL 002	Spruce-fir	73.922	591.199
Colletidae	Colletes kincaidii	Mixed Conifer	78.1096	594.329
Colletidae	Colletes kincaidii	Mixed Conifer	78.185	595.902
Colletidae	Colletes kincaidii	Mixed Conifer	78.282	597.48
Colletidae	Colletes kincaidii	Mixed Conifer	78.299	597.73
Colletidae	Colletes kincaidii	Mixed Conifer	78.3028	597.96
Colletidae	Colletes kincaidii	Mixed Conifer	78.3473	599.062
Colletidae	Colletes kincaidii	Ponderosa	69.9446	592.335
Colletidae	Colletes kincaidii	Ponderosa	70.251	592.761
Colletidae	Hylaeus annulatus	Mixed Conifer	92.0204	696.535
Colletidae	Hylaeus annulatus	Mixed Conifer	92.0264	694.821
Colletidae	Hylaeus annulatus	Ponderosa	79.1437	620.584
Colletidae	Hylaeus rudbeckiae	Spruce-fir	97.1462	221.844
Colletidae	Hylaeus rudbeckiae	Spruce-fir	97.7982	222.009
Halictidae	Agapostemon texanus	Mixed Conifer	69.4316	21.3538
Halictidae	Agapostemon texanus	Mixed Conifer	69.4533	25.1552
Halictidae	Agapostemon texanus	Mixed Conifer	75.3274	26.5427
Halictidae	Agapostemon texanus	Mixed Conifer	75.4172	28.6292
Halictidae	Agapostemon texanus	Mixed Conifer	75.425	28.6292
Halictidae	Agapostemon texanus	Mixed Conifer	75.5063	28.7165
Halictidae	Agapostemon texanus	Mixed Conifer	75.5209	37.578
Halictidae	Agapostemon texanus	Mixed Conifer	75.5251	37.578
Halictidae	Agapostemon texanus	Ponderosa	69.1057	17.9623
Halictidae	Agapostemon texanus	Ponderosa	69.1426	17.9623
Halictidae	Agapostemon texanus	Ponderosa	69.1471	18.3361
Halictidae	Agapostemon texanus	Ponderosa	69.2891	18.4231
Halictidae	Agapostemon texanus	Ponderosa	69.3416	19.4061
Halictidae	Agapostemon texanus	Ponderosa	69.376	21.3538
Halictidae	Agapostemon texanus	Spruce-fir	75.5827	42.93
Halictidae	Agapostemon texanus	Spruce-fir	75.6245	54.6248
Halictidae	Agapostemon texanus	Spruce-fir	80.0932	62.8894
Halictidae	Agapostemon texanus	Spruce-fir	80.1049	73.4076
Halictidae	HAL HAL 001	Spruce-fir	108.65	575.272
Halictidae	HAL LAS 006	Mixed Conifer	108.65	575.436
Halictidae	HAL LAS 006	Mixed Conifer	108.834	575.849
Halictidae	HAL LAS 007	Mixed Conifer	109.017	576.395
Halictidae	HAL LAS 007	Mixed Conifer	109.017	576.499
Halictidae	HAL LAS 008	Mixed Conifer	109.109	576.638
Halictidae	HAL LAS 008	Mixed Conifer	109.109	577.362
Halictidae	HAL LAS 008	Ponderosa	109.063	577.733
Halictidae	HAL LAS 008	Ponderosa	109.092	578.879
Halictidae	HAL LAS DIA 001	Spruce-fir	85.1832	580.402
Halictidae	HAL LAS DIA 001	Spruce-fir	85.2017	581.409
Halictidae	HAL LAS DIA 002	Spruce-fir	85.3289	211.752
Halictidae	HAL LAS DIA 002	Spruce-fir	85.2714	211.76
Halictidae	HAL LAS DIA 002	Spruce-fir	85.264	211.768
Halictidae	HAL LAS DIA 002	Spruce-fir	85.2017	581.929
Halictidae	HAL LAS DIA 003	Spruce-fir	85.3794	211.742
Halictidae	HAL LAS DIA 003	Spruce-fir	85.3576	211.745
Halictidae	HAL LAS DIA 005	Ponderosa	70.129	211.729
Halictidae	HAL LAS DIA 005	Ponderosa	70.105	211.737
Halictidae	HAL LAS DIA 010	Mixed Conifer	87.9509	219.26
Halictidae	HAL LAS DIA 010	Mixed Conifer	87.9501	219.37
Halictidae	HAL LAS DIA 010	Mixed Conifer	87.9496	219.657
Halictidae	HAL LAS DIA 010	Mixed Conifer	87.9469	219.761
Halictidae	HAL LAS DIA 010	Mixed Conifer	87.9466	219.797
Halictidae	HAL LAS DIA 010	Mixed Conifer	87.9463	220.224
Halictidae	HAL LAS DIA 010	Mixed Conifer	87.9452	220.519
Halictidae	HAL LAS DIA 010	Mixed Conifer	87.9421	220.685
Halictidae	HAL LAS DIA 010	Mixed Conifer	87.9404	220.778
Halictidae	HAL LAS DIA 010	Mixed Conifer	87.9367	220.8
Halictidae	HAL LAS DIA 010	Mixed Conifer	87.9366	221.037
Halictidae	HAL LAS DIA 010	Mixed Conifer	87.9366	221.137
Halictidae	HAL LAS DIA 010	Mixed Conifer	87.9352	221.182
Halictidae	HAL LAS DIA 010	Mixed Conifer	87.9352	221.211
Halictidae	HAL LAS DIA 010	Mixed Conifer	87.9333	221.303
Halictidae	HAL LAS DIA 010	Mixed Conifer	87.9329	221.565
Halictidae	HAL LAS DIA 010	Mixed Conifer	87.9298	221.83
Halictidae	HAL LAS DIA 010	Mixed Conifer	87.9273	222.887
Halictidae	HAL LAS DIA 010	Mixed Conifer	87.9246	222.894
Halictidae	HAL LAS DIA 010	Mixed Conifer	87.9237	223.044
Halictidae	HAL LAS DIA 010	Mixed Conifer	87.9232	223.136
Halictidae	HAL LAS DIA 010	Mixed Conifer	87.9184	223.152
Halictidae	HAL LAS DIA 010	Mixed Conifer	87.9159	223.418
Halictidae	HAL LAS DIA 010	Mixed Conifer	87.9158	223.651
Halictidae	HAL LAS DIA 010	Mixed Conifer	87.9149	223.685
Halictidae	HAL LAS DIA 010	Mixed Conifer	87.9128	223.713
Halictidae	HAL LAS DIA 010	Mixed Conifer	87.9086	223.953
Halictidae	HAL LAS DIA 010	Mixed Conifer	87.9082	224.118
Halictidae	HAL LAS DIA 010	Mixed Conifer	87.9062	224.222
Halictidae	HAL LAS DIA 010	Mixed Conifer	87.9049	224.412
Halictidae	HAL LAS DIA 010	Mixed Conifer	87.9044	224.491
Halictidae	HAL LAS DIA 010	Mixed Conifer	87.9025	224.553
Halictidae	HAL LAS DIA 010	Mixed Conifer	87.8984	224.762
Halictidae	HAL LAS DIA 010	Mixed Conifer	85.4386	224.944
Halictidae	HAL LAS DIA 010	Ponderosa	73.0838	215.642
Halictidae	HAL LAS DIA 010	Ponderosa	73.0707	215.708
Halictidae	HAL LAS DIA 010	Ponderosa	72.9835	215.773
Halictidae	HAL LAS DIA 010	Ponderosa	72.9807	215.822
Halictidae	HAL LAS DIA 010	Ponderosa	72.9772	215.834
Halictidae	HAL LAS DIA 010	Ponderosa	72.9181	215.893
Halictidae	HAL LAS DIA 010	Ponderosa	72.869	215.95
Halictidae	HAL LAS DIA 010	Ponderosa	72.8552	215.952
Halictidae	HAL LAS DIA 010	Ponderosa	72.73	215.979
Halictidae	HAL LAS DIA 010	Ponderosa	72.7288	216.003
Halictidae	HAL LAS DIA 010	Ponderosa	72.6554	216.004
Halictidae	HAL LAS DIA 010	Ponderosa	72.6051	216.052
Halictidae	HAL LAS DIA 010	Ponderosa	71.4981	216.098
Halictidae	HAL LAS DIA 010	Ponderosa	71.3875	216.14
Halictidae	HAL LAS DIA 010	Ponderosa	71.3769	216.181
Halictidae	HAL LAS DIA 010	Ponderosa	71.3143	216.218
Halictidae	HAL LAS DIA 010	Ponderosa	71.2561	216.253
Halictidae	HAL LAS DIA 010	Ponderosa	71.1787	216.336
Halictidae	HAL LAS DIA 010	Ponderosa	71.1357	216.41
Halictidae	HAL LAS DIA 010	Ponderosa	71.0156	216.428
Halictidae	HAL LAS DIA 010	Ponderosa	70.8959	216.579
Halictidae	HAL LAS DIA 010	Ponderosa	70.9703	216.579
Halictidae	HAL LAS DIA 010	Ponderosa	70.7765	216.664
Halictidae	HAL LAS DIA 010	Ponderosa	70.776	216.727
Halictidae	HAL LAS DIA 010	Ponderosa	70.7631	216.877
Halictidae	HAL LAS DIA 010	Ponderosa	70.7395	217
Halictidae	HAL LAS DIA 010	Ponderosa	70.6575	217.591
Halictidae	HAL LAS DIA 010	Ponderosa	70.5924	217.611
Halictidae	HAL LAS DIA 010	Ponderosa	70.557	217.691
Halictidae	HAL LAS DIA 010	Ponderosa	70.5388	218.124
Halictidae	HAL LAS DIA 010	Ponderosa	70.426	218.183
Halictidae	HAL LAS DIA 010	Ponderosa	70.4203	218.326
Halictidae	HAL LAS DIA 010	Ponderosa	70.3519	218.342
Halictidae	HAL LAS DIA 010	Ponderosa	70.3022	218.636
Halictidae	HAL LAS DIA 010	Ponderosa	78.383	218.723
Halictidae	HAL LAS DIA 010	Ponderosa	70.1834	218.762
Halictidae	HAL LAS DIA 010	Ponderosa	70.1626	218.775
Halictidae	HAL LAS DIA 010	Ponderosa	70.1477	219.146
Halictidae	HAL LAS DIA 010	Spruce-fir	95.4595	215.501
Halictidae	HAL LAS DIA 010	Spruce-fir	95.45	215.513
Halictidae	HAL LAS DIA 010	Spruce-fir	95.4474	215.572
Halictidae	HAL LAS DIA 010	Spruce-fir	95.4332	215.641
Halictidae	HAL LAS DIA 011	Mixed Conifer	87.952	215.426
Halictidae	HAL LAS DIA 011	Ponderosa	78.5003	213.129
Halictidae	HAL LAS DIA 011	Ponderosa	78.4967	213.152
Halictidae	HAL LAS DIA 011	Ponderosa	78.4511	213.196
Halictidae	HAL LAS DIA 011	Ponderosa	78.4006	213.212
Halictidae	HAL LAS DIA 011	Ponderosa	73.8674	213.248
Halictidae	HAL LAS DIA 011	Ponderosa	73.705	213.248
Halictidae	HAL LAS DIA 011	Ponderosa	73.7402	213.248
Halictidae	HAL LAS DIA 011	Ponderosa	73.6133	213.261
Halictidae	HAL LAS DIA 011	Ponderosa	73.4968	213.271
Halictidae	HAL LAS DIA 011	Ponderosa	73.4862	213.314
Halictidae	HAL LAS DIA 011	Ponderosa	73.431	213.324
Halictidae	HAL LAS DIA 011	Ponderosa	73.3595	213.328
Halictidae	HAL LAS DIA 011	Ponderosa	73.3469	213.365
Halictidae	HAL LAS DIA 011	Ponderosa	73.296	213.384
Halictidae	HAL LAS DIA 011	Ponderosa	73.296	213.386
Halictidae	HAL LAS DIA 011	Ponderosa	73.2897	213.414
Halictidae	HAL LAS DIA 011	Ponderosa	73.2705	213.435
Halictidae	HAL LAS DIA 011	Ponderosa	73.2329	215.234
Halictidae	HAL LAS DIA 011	Ponderosa	73.2119	215.271
Halictidae	HAL LAS DIA 011	Ponderosa	73.1066	215.35
Halictidae	HAL LAS DIA 011	Spruce-fir	95.5164	212.785
Halictidae	HAL LAS DIA 011	Spruce-fir	95.51	212.788
Halictidae	HAL LAS DIA 011	Spruce-fir	95.5069	212.791
Halictidae	HAL LAS DIA 011	Spruce-fir	95.5068	212.794
Halictidae	HAL LAS DIA 011	Spruce-fir	95.5067	212.797
Halictidae	HAL LAS DIA 011	Spruce-fir	95.5063	212.849
Halictidae	HAL LAS DIA 011	Spruce-fir	95.5047	212.852
Halictidae	HAL LAS DIA 011	Spruce-fir	95.5018	212.855
Halictidae	HAL LAS DIA 011	Spruce-fir	95.4979	212.858
Halictidae	HAL LAS DIA 011	Spruce-fir	95.494	212.861
Halictidae	HAL LAS DIA 011	Spruce-fir	95.49	212.9
Halictidae	HAL LAS DIA 011	Spruce-fir	95.4847	212.917
Halictidae	HAL LAS DIA 011	Spruce-fir	95.4821	212.92
Halictidae	HAL LAS DIA 011	Spruce-fir	95.4779	212.923
Halictidae	HAL LAS DIA 011	Spruce-fir	95.4695	212.99
Halictidae	HAL LAS DIA 011	Spruce-fir	95.465	213.06
Halictidae	HAL LAS DIA 012	Mixed Conifer	87.9551	212.731
Halictidae	HAL LAS DIA 012	Ponderosa	78.5948	212.725
Halictidae	HAL LAS DIA 012	Ponderosa	78.5481	212.728
Halictidae	HAL LAS DIA 016	Mixed Conifer	87.9582	212.723
Halictidae	HAL LAS DIA 017	Spruce-fir	95.6365	212.72
Halictidae	HAL LAS DIA 017	Spruce-fir	95.5229	212.721
Halictidae	HAL LAS DIA 018	Mixed Conifer	91.7407	212.609
Halictidae	HAL LAS DIA 018	Mixed Conifer	91.7271	212.612
Halictidae	HAL LAS DIA 018	Mixed Conifer	91.7138	212.614
Halictidae	HAL LAS DIA 018	Mixed Conifer	91.694	212.635
Halictidae	HAL LAS DIA 018	Mixed Conifer	91.6842	212.637
Halictidae	HAL LAS DIA 018	Mixed Conifer	91.664	212.64
Halictidae	HAL LAS DIA 018	Mixed Conifer	91.6609	212.642
Halictidae	HAL LAS DIA 018	Mixed Conifer	91.6276	212.678
Halictidae	HAL LAS DIA 018	Mixed Conifer	91.6275	212.68
Halictidae	HAL LAS DIA 018	Mixed Conifer	87.9636	212.683
Halictidae	HAL LAS DIA 018	Mixed Conifer	87.9618	212.686
Halictidae	HAL LAS DIA 018	Mixed Conifer	87.9611	212.689
Halictidae	HAL LAS DIA 018	Ponderosa	79.0518	211.858
Halictidae	HAL LAS DIA 018	Ponderosa	79.0483	211.867
Halictidae	HAL LAS DIA 018	Ponderosa	79.0094	211.875
Halictidae	HAL LAS DIA 018	Ponderosa	79.0055	211.884
Halictidae	HAL LAS DIA 018	Ponderosa	78.9701	211.892
Halictidae	HAL LAS DIA 018	Ponderosa	78.9589	211.901
Halictidae	HAL LAS DIA 018	Ponderosa	78.9303	211.909
Halictidae	HAL LAS DIA 018	Ponderosa	78.912	211.918
Halictidae	HAL LAS DIA 018	Ponderosa	78.8901	211.927
Halictidae	HAL LAS DIA 018	Ponderosa	78.8862	212.32
Halictidae	HAL LAS DIA 018	Ponderosa	78.8649	212.422
Halictidae	HAL LAS DIA 018	Ponderosa	78.8493	212.532
Halictidae	HAL LAS DIA 018	Ponderosa	78.836	212.555
Halictidae	HAL LAS DIA 018	Ponderosa	78.8176	212.558
Halictidae	HAL LAS DIA 018	Ponderosa	78.8082	212.56
Halictidae	HAL LAS DIA 018	Ponderosa	78.7665	212.581
Halictidae	HAL LAS DIA 018	Ponderosa	78.7242	212.584
Halictidae	HAL LAS DIA 018	Ponderosa	78.6912	212.586
Halictidae	HAL LAS DIA 018	Ponderosa	78.6819	212.601
Halictidae	HAL LAS DIA 018	Ponderosa	78.6388	212.607
Halictidae	HAL LAS DIA 024	Spruce-fir	96.6762	211.776
Halictidae	HAL LAS DIA 024	Spruce-fir	96.6536	211.784
Halictidae	HAL LAS DIA 024	Spruce-fir	96.4917	211.792
Halictidae	HAL LAS DIA 024	Spruce-fir	96.3895	211.8
Halictidae	HAL LAS DIA 024	Spruce-fir	96.2648	211.808
Halictidae	HAL LAS DIA 024	Spruce-fir	96.2157	211.817
Halictidae	HAL LAS DIA 024	Spruce-fir	96.1517	211.825
Halictidae	HAL LAS DIA 024	Spruce-fir	96.0164	211.833
Halictidae	HAL LAS DIA 024	Spruce-fir	95.9022	211.841
Halictidae	HAL LAS DIA 024	Spruce-fir	95.7347	211.85
Halictidae	HAL LAS HAS 001	Mixed Conifer	91.76	702.403
Halictidae	HAL LAS HAS 001	Mixed Conifer	91.7684	702.317
Halictidae	HAL LAS HAS 001	Mixed Conifer	91.793	702.187
Halictidae	HAL LAS HAS 001	Mixed Conifer	91.797	701.284
Halictidae	HAL LAS HAS 001	Mixed Conifer	91.826	701.099
Halictidae	HAL LAS HAS 001	Mixed Conifer	91.8292	700.947
Halictidae	HAL LAS HAS 001	Ponderosa	79.0868	624.492
Halictidae	HAL LAS HAS 001	Ponderosa	79.0764	626.455
Halictidae	HAL MAC 001	Mixed Conifer	91.8531	700.939
Halictidae	HAL MAC 001	Mixed Conifer	91.8591	700.051
Halictidae	HAL MAC 001	Ponderosa	79.1248	622.23
Halictidae	HAL MAC 001	Ponderosa	79.0979	622.535
Halictidae	HAL SPH 001	Mixed Conifer	91.8924	699.931
Halictidae	HAL SPH 001	Mixed Conifer	91.9091	699.931
Halictidae	HAL SPH 003	Mixed Conifer	91.9257	699.846
Halictidae	HAL SPH 003	Mixed Conifer	91.9591	698.56
Halictidae	HAL SPH 003	Mixed Conifer	91.9648	697.131
Halictidae	HAL SPH 003	Mixed Conifer	91.9927	696.899
Halictidae	Lasioglossum coriaceum	Spruce-fir	97.8256	222.094
Halictidae	Lasioglossum coriaceum	Spruce-fir	97.9134	222.358
Halictidae	Lasioglossum coriaceum	Spruce-fir	97.9564	222.622
Halictidae	Lasioglossum coriaceum	Spruce-fir	97.9891	222.877
Halictidae	Lasioglossum desertum	Mixed Conifer	92.0601	234.898
Halictidae	Lasioglossum desertum	Mixed Conifer	92.0758	235.42
Halictidae	Lasioglossum desertum	Mixed Conifer	92.0936	235.946
Halictidae	Lasioglossum desertum	Mixed Conifer	92.094	236.465
Halictidae	Lasioglossum desertum	Mixed Conifer	92.1272	236.987
Halictidae	Lasioglossum desertum	Mixed Conifer	92.1279	237.489
Halictidae	Lasioglossum desertum	Mixed Conifer	92.1309	237.926
Halictidae	Lasioglossum desertum	Mixed Conifer	92.1618	238.171
Halictidae	Lasioglossum desertum	Mixed Conifer	92.1667	238.642
Halictidae	Lasioglossum desertum	Mixed Conifer	92.1859	240.657
Halictidae	Lasioglossum desertum	Mixed Conifer	92.1953	241.773
Halictidae	Lasioglossum desertum	Mixed Conifer	92.2289	252.022
Halictidae	Lasioglossum desertum	Mixed Conifer	92.2294	260.791
Halictidae	Lasioglossum desertum	Mixed Conifer	92.2406	265.963
Halictidae	Lasioglossum desertum	Mixed Conifer	92.2618	268.197
Halictidae	Lasioglossum desertum	Mixed Conifer	92.2945	268.352
Halictidae	Lasioglossum desertum	Mixed Conifer	92.2952	275.128
Halictidae	Lasioglossum desertum	Mixed Conifer	92.3267	275.982
Halictidae	Lasioglossum desertum	Mixed Conifer	92.3494	276.302
Halictidae	Lasioglossum desertum	Mixed Conifer	92.3584	276.454
Halictidae	Lasioglossum desertum	Mixed Conifer	92.39	282.651
Halictidae	Lasioglossum desertum	Mixed Conifer	92.4034	285.085
Halictidae	Lasioglossum desertum	Mixed Conifer	92.4211	562.015
Halictidae	Lasioglossum desertum	Mixed Conifer	92.4268	562.025
Halictidae	Lasioglossum desertum	Mixed Conifer	92.4521	562.147
Halictidae	Lasioglossum desertum	Mixed Conifer	92.4571	562.211
Halictidae	Lasioglossum desertum	Mixed Conifer	92.4822	562.506
Halictidae	Lasioglossum desertum	Mixed Conifer	92.5101	562.532
Halictidae	Lasioglossum desertum	Mixed Conifer	92.5116	562.557
Halictidae	Lasioglossum desertum	Mixed Conifer	92.5411	562.613
Halictidae	Lasioglossum desertum	Mixed Conifer	92.5624	562.646
Halictidae	Lasioglossum desertum	Mixed Conifer	92.5698	562.697
Halictidae	Lasioglossum desertum	Mixed Conifer	92.5763	562.86
Halictidae	Lasioglossum desertum	Mixed Conifer	92.5976	562.903
Halictidae	Lasioglossum desertum	Mixed Conifer	92.6104	562.912
Halictidae	Lasioglossum desertum	Mixed Conifer	92.6144	563.314
Halictidae	Lasioglossum desertum	Mixed Conifer	92.6218	563.386
Halictidae	Lasioglossum desertum	Mixed Conifer	92.6254	563.405
Halictidae	Lasioglossum desertum	Mixed Conifer	92.6525	563.48
Halictidae	Lasioglossum desertum	Mixed Conifer	92.6616	563.486
Halictidae	Lasioglossum desertum	Mixed Conifer	92.6787	563.512
Halictidae	Lasioglossum desertum	Mixed Conifer	92.7048	563.621
Halictidae	Lasioglossum desertum	Mixed Conifer	92.7086	563.632
Halictidae	Lasioglossum desertum	Mixed Conifer	92.7282	563.696
Halictidae	Lasioglossum desertum	Mixed Conifer	92.7302	563.835
Halictidae	Lasioglossum desertum	Mixed Conifer	92.7364	563.887
Halictidae	Lasioglossum desertum	Mixed Conifer	92.7547	563.955
Halictidae	Lasioglossum desertum	Mixed Conifer	92.7642	564
Halictidae	Lasioglossum desertum	Mixed Conifer	92.7792	564.028
Halictidae	Lasioglossum desertum	Mixed Conifer	92.7918	564.093
Halictidae	Lasioglossum desertum	Mixed Conifer	92.8036	564.264
Halictidae	Lasioglossum desertum	Mixed Conifer	92.8153	564.306
Halictidae	Lasioglossum desertum	Mixed Conifer	92.8274	564.692
Halictidae	Lasioglossum desertum	Mixed Conifer	92.8372	564.705
Halictidae	Lasioglossum desertum	Mixed Conifer	92.8512	564.828
Halictidae	Lasioglossum desertum	Mixed Conifer	92.8579	564.842
Halictidae	Lasioglossum desertum	Mixed Conifer	92.8739	565.265
Halictidae	Lasioglossum desertum	Mixed Conifer	92.8782	565.36
Halictidae	Lasioglossum desertum	Mixed Conifer	92.8967	565.41
Halictidae	Lasioglossum desertum	Mixed Conifer	92.8983	565.601
Halictidae	Lasioglossum desertum	Mixed Conifer	92.918	565.618
Halictidae	Lasioglossum desertum	Mixed Conifer	92.9185	565.639
Halictidae	Lasioglossum desertum	Mixed Conifer	92.9371	566.165
Halictidae	Lasioglossum desertum	Mixed Conifer	92.9396	566.506
Halictidae	Lasioglossum desertum	Mixed Conifer	92.9557	566.884
Halictidae	Lasioglossum desertum	Mixed Conifer	92.9604	567.003
Halictidae	Lasioglossum desertum	Mixed Conifer	92.9669	567.397
Halictidae	Lasioglossum desertum	Mixed Conifer	92.9742	567.864
Halictidae	Lasioglossum desertum	Mixed Conifer	92.9803	567.916
Halictidae	Lasioglossum desertum	Mixed Conifer	92.9923	568.32
Halictidae	Lasioglossum desertum	Mixed Conifer	92.9986	568.362
Halictidae	Lasioglossum desertum	Mixed Conifer	92.9998	568.763
Halictidae	Lasioglossum desertum	Mixed Conifer	93.0089	568.911
Halictidae	Lasioglossum desertum	Mixed Conifer	93.0186	569.292
Halictidae	Lasioglossum desertum	Mixed Conifer	93.0252	569.85
Halictidae	Lasioglossum desertum	Mixed Conifer	93.0289	569.963
Halictidae	Lasioglossum desertum	Ponderosa	79.1624	109.931
Halictidae	Lasioglossum desertum	Ponderosa	79.1893	109.931
Halictidae	Lasioglossum desertum	Ponderosa	79.1995	109.931
Halictidae	Lasioglossum desertum	Ponderosa	79.2346	109.931
Halictidae	Lasioglossum desertum	Ponderosa	79.2362	109.931
Halictidae	Lasioglossum desertum	Ponderosa	79.2653	109.932
Halictidae	Lasioglossum desertum	Ponderosa	79.2724	109.932
Halictidae	Lasioglossum desertum	Ponderosa	79.2797	109.934
Halictidae	Lasioglossum desertum	Ponderosa	79.3082	109.937
Halictidae	Lasioglossum desertum	Ponderosa	79.3245	109.945
Halictidae	Lasioglossum desertum	Ponderosa	79.3435	109.954
Halictidae	Lasioglossum desertum	Ponderosa	79.3691	109.954
Halictidae	Lasioglossum desertum	Ponderosa	79.3783	109.968
Halictidae	Lasioglossum desertum	Ponderosa	79.4127	109.99
Halictidae	Lasioglossum desertum	Ponderosa	79.4135	110.025
Halictidae	Lasioglossum desertum	Ponderosa	79.4466	110.025
Halictidae	Lasioglossum desertum	Ponderosa	79.454	110.167
Halictidae	Lasioglossum desertum	Ponderosa	79.4576	110.309
Halictidae	Lasioglossum desertum	Ponderosa	79.48	110.309
Halictidae	Lasioglossum desertum	Ponderosa	83.8307	168.033
Halictidae	Lasioglossum desertum	Ponderosa	83.8719	171.227
Halictidae	Lasioglossum desertum	Ponderosa	80.1699	171.419
Halictidae	Lasioglossum desertum	Ponderosa	80.1705	171.807
Halictidae	Lasioglossum desertum	Ponderosa	80.1852	172.884
Halictidae	Lasioglossum desertum	Ponderosa	80.1912	173.077
Halictidae	Lasioglossum desertum	Ponderosa	80.193	173.217
Halictidae	Lasioglossum desertum	Ponderosa	80.193	173.805
Halictidae	Lasioglossum desertum	Ponderosa	80.1982	174.326
Halictidae	Lasioglossum desertum	Ponderosa	80.2087	174.439
Halictidae	Lasioglossum desertum	Ponderosa	80.2114	174.877
Halictidae	Lasioglossum desertum	Ponderosa	80.2175	175.131
Halictidae	Lasioglossum desertum	Ponderosa	80.231	175.376
Halictidae	Lasioglossum desertum	Ponderosa	80.2444	175.44
Halictidae	Lasioglossum desertum	Ponderosa	80.25	175.442
Halictidae	Lasioglossum desertum	Ponderosa	80.2686	177.077
Halictidae	Lasioglossum desertum	Ponderosa	80.2769	177.101
Halictidae	Lasioglossum desertum	Ponderosa	80.2866	177.174
Halictidae	Lasioglossum desertum	Ponderosa	80.299	177.281
Halictidae	Lasioglossum desertum	Ponderosa	80.3042	177.299
Halictidae	Lasioglossum desertum	Ponderosa	80.3081	177.38
Halictidae	Lasioglossum desertum	Ponderosa	80.3214	177.408
Halictidae	Lasioglossum desertum	Ponderosa	80.338	178.256
Halictidae	Lasioglossum desertum	Ponderosa	80.3391	178.51
Halictidae	Lasioglossum desertum	Ponderosa	80.3545	178.673
Halictidae	Lasioglossum desertum	Ponderosa	80.3577	179.547
Halictidae	Lasioglossum desertum	Ponderosa	80.3597	179.687
Halictidae	Lasioglossum desertum	Ponderosa	80.3656	180.583
Halictidae	Lasioglossum desertum	Ponderosa	80.3709	181.068
Halictidae	Lasioglossum desertum	Ponderosa	80.3711	181.455
Halictidae	Lasioglossum desertum	Ponderosa	80.3873	182.026
Halictidae	Lasioglossum desertum	Ponderosa	80.3917	182.253
Halictidae	Lasioglossum desertum	Ponderosa	80.4031	183.009
Halictidae	Lasioglossum desertum	Ponderosa	80.4138	183.44
Halictidae	Lasioglossum desertum	Ponderosa	80.4175	183.771
Halictidae	Lasioglossum desertum	Ponderosa	80.4184	184.208
Halictidae	Lasioglossum desertum	Ponderosa	80.4335	184.397
Halictidae	Lasioglossum desertum	Ponderosa	80.4424	184.637
Halictidae	Lasioglossum desertum	Ponderosa	80.4426	185.327
Halictidae	Lasioglossum desertum	Ponderosa	80.4483	185.507
Halictidae	Lasioglossum desertum	Ponderosa	80.4626	186.376
Halictidae	Lasioglossum desertum	Ponderosa	80.4671	186.654
Halictidae	Lasioglossum desertum	Ponderosa	80.4717	186.8
Halictidae	Lasioglossum desertum	Ponderosa	80.4765	187.133
Halictidae	Lasioglossum desertum	Ponderosa	80.4892	187.238
Halictidae	Lasioglossum desertum	Ponderosa	80.4898	187.249
Halictidae	Lasioglossum desertum	Ponderosa	80.4981	188.126
Halictidae	Lasioglossum desertum	Ponderosa	80.5003	189.007
Halictidae	Lasioglossum desertum	Ponderosa	80.5026	189.237
Halictidae	Lasioglossum desertum	Ponderosa	80.5113	189.893
Halictidae	Lasioglossum desertum	Ponderosa	80.515	190.147
Halictidae	Lasioglossum desertum	Ponderosa	80.5175	190.42
Halictidae	Lasioglossum desertum	Ponderosa	80.5194	190.601
Halictidae	Lasioglossum desertum	Ponderosa	80.5195	190.784
Halictidae	Lasioglossum desertum	Ponderosa	80.5273	191.679
Halictidae	Lasioglossum desertum	Ponderosa	80.5276	191.706
Halictidae	Lasioglossum desertum	Ponderosa	80.5358	192.297
Halictidae	Lasioglossum desertum	Ponderosa	80.5392	192.578
Halictidae	Lasioglossum desertum	Ponderosa	80.5505	192.601
Halictidae	Lasioglossum desertum	Ponderosa	80.5613	193.156
Halictidae	Lasioglossum desertum	Ponderosa	80.5715	193.483
Halictidae	Lasioglossum desertum	Ponderosa	80.5812	193.697
Halictidae	Lasioglossum desertum	Ponderosa	80.5909	194.21
Halictidae	Lasioglossum desertum	Ponderosa	80.6001	194.239
Halictidae	Lasioglossum desertum	Ponderosa	80.6087	194.392
Halictidae	Lasioglossum desertum	Ponderosa	80.6168	194.782
Halictidae	Lasioglossum desertum	Ponderosa	80.6244	195.059
Halictidae	Lasioglossum desertum	Ponderosa	80.6314	195.282
Halictidae	Lasioglossum desertum	Ponderosa	80.6378	195.306
Halictidae	Lasioglossum desertum	Ponderosa	80.6381	195.757
Halictidae	Lasioglossum desertum	Ponderosa	80.6437	196.225
Halictidae	Lasioglossum desertum	Ponderosa	80.6492	196.234
Halictidae	Lasioglossum desertum	Ponderosa	80.6545	196.748
Halictidae	Lasioglossum desertum	Ponderosa	80.6599	196.769
Halictidae	Lasioglossum desertum	Ponderosa	80.6651	196.822
Halictidae	Lasioglossum desertum	Ponderosa	80.6703	197.149
Halictidae	Lasioglossum desertum	Ponderosa	80.6753	197.306
Halictidae	Lasioglossum desertum	Ponderosa	80.6778	197.676
Halictidae	Lasioglossum desertum	Ponderosa	80.6802	197.841
Halictidae	Lasioglossum desertum	Ponderosa	80.685	198.077
Halictidae	Lasioglossum desertum	Ponderosa	80.6898	198.378
Halictidae	Lasioglossum desertum	Ponderosa	80.6944	198.916
Halictidae	Lasioglossum desertum	Ponderosa	80.699	199.011
Halictidae	Lasioglossum desertum	Ponderosa	80.7034	199.32
Halictidae	Lasioglossum desertum	Ponderosa	80.7077	199.455
Halictidae	Lasioglossum desertum	Ponderosa	80.712	199.949
Halictidae	Lasioglossum desertum	Ponderosa	80.7162	199.996
Halictidae	Lasioglossum desertum	Ponderosa	80.7203	200.192
Halictidae	Lasioglossum desertum	Ponderosa	80.7242	200.539
Halictidae	Lasioglossum desertum	Ponderosa	80.728	200.892
Halictidae	Lasioglossum desertum	Ponderosa	80.7318	201.083
Halictidae	Lasioglossum desertum	Ponderosa	80.7356	201.629
Halictidae	Lasioglossum desertum	Ponderosa	80.7391	201.84
Halictidae	Lasioglossum desertum	Ponderosa	80.7426	201.928
Halictidae	Lasioglossum desertum	Ponderosa	80.746	202.177
Halictidae	Lasioglossum desertum	Ponderosa	83.7224	213.438
Halictidae	Lasioglossum desertum	Ponderosa	83.713	213.462
Halictidae	Lasioglossum desertum	Ponderosa	83.5705	213.478
Halictidae	Lasioglossum desertum	Ponderosa	83.4337	213.481
Halictidae	Lasioglossum desertum	Ponderosa	83.4305	213.49
Halictidae	Lasioglossum desertum	Ponderosa	83.4179	213.508
Halictidae	Lasioglossum desertum	Ponderosa	83.2648	213.52
Halictidae	Lasioglossum desertum	Ponderosa	83.1584	213.547
Halictidae	Lasioglossum desertum	Ponderosa	83.1117	213.552
Halictidae	Lasioglossum desertum	Ponderosa	82.9573	213.553
Halictidae	Lasioglossum desertum	Ponderosa	82.8904	213.56
Halictidae	Lasioglossum desertum	Ponderosa	82.8007	213.586
Halictidae	Lasioglossum desertum	Ponderosa	82.7972	213.609
Halictidae	Lasioglossum desertum	Ponderosa	82.6382	213.623
Halictidae	Lasioglossum desertum	Ponderosa	82.6208	213.658
Halictidae	Lasioglossum desertum	Ponderosa	82.615	213.692
Halictidae	Lasioglossum desertum	Ponderosa	79.9584	213.724
Halictidae	Lasioglossum desertum	Ponderosa	79.9438	213.754
Halictidae	Lasioglossum desertum	Ponderosa	79.9321	213.772
Halictidae	Lasioglossum desertum	Ponderosa	79.9272	213.781
Halictidae	Lasioglossum desertum	Ponderosa	79.9051	213.796
Halictidae	Lasioglossum desertum	Ponderosa	79.8857	213.805
Halictidae	Lasioglossum desertum	Ponderosa	79.8798	213.818
Halictidae	Lasioglossum desertum	Ponderosa	79.8777	213.826
Halictidae	Lasioglossum desertum	Ponderosa	79.8497	213.836
Halictidae	Lasioglossum desertum	Ponderosa	79.8485	213.844
Halictidae	Lasioglossum desertum	Ponderosa	79.844	213.852
Halictidae	Lasioglossum desertum	Ponderosa	79.8216	213.859
Halictidae	Lasioglossum desertum	Ponderosa	79.8212	213.865
Halictidae	Lasioglossum desertum	Ponderosa	79.802	213.87
Halictidae	Lasioglossum desertum	Ponderosa	79.7921	213.875
Halictidae	Lasioglossum desertum	Ponderosa	79.7627	213.879
Halictidae	Lasioglossum desertum	Ponderosa	79.7598	213.882
Halictidae	Lasioglossum desertum	Ponderosa	79.7489	213.884
Halictidae	Lasioglossum desertum	Ponderosa	79.7332	213.886
Halictidae	Lasioglossum desertum	Ponderosa	79.7208	213.886
Halictidae	Lasioglossum desertum	Ponderosa	79.7174	214.064
Halictidae	Lasioglossum desertum	Ponderosa	79.7032	214.352
Halictidae	Lasioglossum desertum	Ponderosa	79.699	214.454
Halictidae	Lasioglossum desertum	Ponderosa	79.6747	214.554
Halictidae	Lasioglossum desertum	Ponderosa	79.6727	214.622
Halictidae	Lasioglossum desertum	Ponderosa	79.6417	214.648
Halictidae	Lasioglossum desertum	Ponderosa	79.6317	214.651
Halictidae	Lasioglossum desertum	Ponderosa	79.629	214.658
Halictidae	Lasioglossum desertum	Ponderosa	79.6102	214.746
Halictidae	Lasioglossum desertum	Ponderosa	79.5886	214.767
Halictidae	Lasioglossum desertum	Ponderosa	79.5781	214.839
Halictidae	Lasioglossum desertum	Ponderosa	79.5573	214.873
Halictidae	Lasioglossum desertum	Ponderosa	79.5456	214.93
Halictidae	Lasioglossum desertum	Ponderosa	79.5451	215.019
Halictidae	Lasioglossum desertum	Ponderosa	79.5404	215.039
Halictidae	Lasioglossum desertum	Ponderosa	79.5129	215.101
Halictidae	Lasioglossum desertum	Ponderosa	79.5015	215.105
Halictidae	Lasioglossum desertum	Ponderosa	79.4903	215.189
Halictidae	Lasioglossum desertum	Spruce-fir	97.9973	570.316
Halictidae	Lasioglossum desertum	Spruce-fir	97.9993	571.062
Halictidae	Lasioglossum egregium	Mixed Conifer	93.0365	227.529
Halictidae	Lasioglossum egregium	Mixed Conifer	93.041	227.836
Halictidae	Lasioglossum egregium	Mixed Conifer	93.0543	228.325
Halictidae	Lasioglossum egregium	Mixed Conifer	93.0564	228.815
Halictidae	Lasioglossum egregium	Mixed Conifer	93.071	229.308
Halictidae	Lasioglossum egregium	Mixed Conifer	93.0712	229.803
Halictidae	Lasioglossum egregium	Mixed Conifer	93.0859	230.3
Halictidae	Lasioglossum egregium	Mixed Conifer	93.0875	230.345
Halictidae	Lasioglossum egregium	Mixed Conifer	93.1	230.585
Halictidae	Lasioglossum egregium	Mixed Conifer	93.1029	230.801
Halictidae	Lasioglossum egregium	Mixed Conifer	93.1131	231.106
Halictidae	Lasioglossum egregium	Mixed Conifer	93.1179	231.304
Halictidae	Lasioglossum egregium	Mixed Conifer	93.122	231.809
Halictidae	Lasioglossum egregium	Mixed Conifer	93.1246	232.317
Halictidae	Lasioglossum egregium	Mixed Conifer	93.1321	232.828
Halictidae	Lasioglossum egregium	Mixed Conifer	93.136	233.014
Halictidae	Lasioglossum egregium	Mixed Conifer	93.1455	233.341
Halictidae	Lasioglossum egregium	Mixed Conifer	93.1469	233.857
Halictidae	Lasioglossum egregium	Ponderosa	80.7493	77.5604
Halictidae	Lasioglossum egregium	Ponderosa	80.7526	78.1725
Halictidae	Lasioglossum egregium	Ponderosa	80.7557	84.747
Halictidae	Lasioglossum egregium	Ponderosa	80.7587	106.902
Halictidae	Lasioglossum egregium	Ponderosa	80.7617	106.902
Halictidae	Lasioglossum egregium	Ponderosa	80.7646	106.902
Halictidae	Lasioglossum egregium	Ponderosa	80.7674	107.485
Halictidae	Lasioglossum egregium	Ponderosa	80.7701	109.174
Halictidae	Lasioglossum egregium	Ponderosa	80.7728	109.174
Halictidae	Lasioglossum egregium	Ponderosa	80.7754	109.457
Halictidae	Lasioglossum egregium	Ponderosa	80.7779	109.741
Halictidae	Lasioglossum egregium	Ponderosa	80.7803	109.741
Halictidae	Lasioglossum egregium	Ponderosa	80.7826	109.812
Halictidae	Lasioglossum egregium	Ponderosa	80.7849	109.812
Halictidae	Lasioglossum egregium	Ponderosa	80.8382	109.842
Halictidae	Lasioglossum egregium	Ponderosa	80.8386	109.857
Halictidae	Lasioglossum egregium	Ponderosa	80.8973	109.871
Halictidae	Lasioglossum egregium	Ponderosa	80.9999	109.883
Halictidae	Lasioglossum egregium	Ponderosa	81.128	109.883
Halictidae	Lasioglossum egregium	Ponderosa	81.1432	109.901
Halictidae	Lasioglossum egregium	Ponderosa	81.1617	109.912
Halictidae	Lasioglossum egregium	Ponderosa	81.3241	109.919
Halictidae	Lasioglossum egregium	Spruce-fir	97.9998	234.376
Halictidae	Lasioglossum egregium	Spruce-fir	98	371.342
Halictidae	Lasioglossum egregium	Spruce-fir	98	371.389
Halictidae	Lasioglossum egregium	Spruce-fir	98	371.91
Halictidae	Lasioglossum egregium	Spruce-fir	98	372.182
Halictidae	Lasioglossum egregium	Spruce-fir	109.12	372.487
Halictidae	Lasioglossum egregium	Spruce-fir	109.132	372.839
Halictidae	Lasioglossum egregium	Spruce-fir	109.135	373.076
Halictidae	Lasioglossum petrellum	Mixed Conifer	93.1574	573.327
Halictidae	Lasioglossum petrellum	Mixed Conifer	93.1584	574.053
Halictidae	Lasioglossum pruinosiformis	Mixed Conifer	93.1674	116.635
Halictidae	Lasioglossum pruinosiformis	Mixed Conifer	93.1703	119.497
Halictidae	Lasioglossum pruinosiformis	Mixed Conifer	93.1773	119.756
Halictidae	Lasioglossum pruinosiformis	Mixed Conifer	93.1819	119.865
Halictidae	Lasioglossum pruinosiformis	Mixed Conifer	93.1869	122.272
Halictidae	Lasioglossum pruinosiformis	Mixed Conifer	93.1922	124.396
Halictidae	Lasioglossum pruinosiformis	Mixed Conifer	93.1961	124.396
Halictidae	Lasioglossum pruinosiformis	Mixed Conifer	93.2024	125.29
Halictidae	Lasioglossum pruinosiformis	Mixed Conifer	93.2049	128.379
Halictidae	Lasioglossum pruinosiformis	Mixed Conifer	93.2114	132.625
Halictidae	Lasioglossum pruinosiformis	Mixed Conifer	93.213	133.049
Halictidae	Lasioglossum pruinosiformis	Mixed Conifer	93.2198	133.401
Halictidae	Lasioglossum pruinosiformis	Mixed Conifer	93.2209	134.292
Halictidae	Lasioglossum pruinosiformis	Mixed Conifer	93.2273	134.298
Halictidae	Lasioglossum pruinosiformis	Mixed Conifer	93.2283	134.48
Halictidae	Lasioglossum pruinosiformis	Mixed Conifer	93.2339	134.542
Halictidae	Lasioglossum pruinosiformis	Mixed Conifer	93.2353	134.69
Halictidae	Lasioglossum pruinosiformis	Mixed Conifer	93.24	134.752
Halictidae	Lasioglossum pruinosiformis	Mixed Conifer	93.2418	134.761
Halictidae	Lasioglossum pruinosiformis	Mixed Conifer	93.2455	134.761
Halictidae	Lasioglossum pruinosiformis	Mixed Conifer	93.2477	134.763
Halictidae	Lasioglossum pruinosiformis	Mixed Conifer	93.2506	134.763
Halictidae	Lasioglossum pruinosiformis	Mixed Conifer	93.2527	134.763
Halictidae	Lasioglossum pruinosiformis	Mixed Conifer	93.2554	134.766
Halictidae	Lasioglossum pruinosiformis	Mixed Conifer	93.2567	134.771
Halictidae	Lasioglossum pruinosiformis	Mixed Conifer	93.2696	134.776
Halictidae	Lasioglossum pruinosiformis	Mixed Conifer	93.2702	134.795
Halictidae	Lasioglossum pruinosiformis	Mixed Conifer	93.2716	134.797
Halictidae	Lasioglossum pruinosiformis	Mixed Conifer	93.2718	134.826
Halictidae	Lasioglossum pruinosiformis	Mixed Conifer	93.2727	134.85
Halictidae	Lasioglossum pruinosiformis	Mixed Conifer	93.2728	134.852
Halictidae	Lasioglossum pruinosiformis	Mixed Conifer	93.2732	135.147
Halictidae	Lasioglossum pruinosiformis	Mixed Conifer	93.2772	135.308
Halictidae	Lasioglossum pruinosiformis	Mixed Conifer	93.346	135.343
Halictidae	Lasioglossum pruinosiformis	Ponderosa	81.3595	19.722
Halictidae	Lasioglossum pruinosiformis	Ponderosa	81.4744	19.7835
Halictidae	Lasioglossum pruinosiformis	Ponderosa	81.4869	19.7835
Halictidae	Lasioglossum pruinosiformis	Ponderosa	81.5043	19.7835
Halictidae	Lasioglossum pruinosiformis	Ponderosa	81.5946	19.7835
Halictidae	Lasioglossum pruinosiformis	Ponderosa	81.6003	19.8059
Halictidae	Lasioglossum pruinosiformis	Ponderosa	81.6171	19.8059
Halictidae	Lasioglossum pruinosiformis	Ponderosa	81.6228	19.8199
Halictidae	Lasioglossum pruinosiformis	Ponderosa	81.6242	19.8199
Halictidae	Lasioglossum pruinosiformis	Ponderosa	81.6245	19.8199
Halictidae	Lasioglossum pruinosiformis	Ponderosa	81.6246	19.826
Halictidae	Lasioglossum pruinosiformis	Ponderosa	81.6247	19.826
Halictidae	Lasioglossum pruinosiformis	Ponderosa	81.6249	19.826
Halictidae	Lasioglossum pruinosiformis	Ponderosa	81.6256	19.826
Halictidae	Lasioglossum pruinosiformis	Ponderosa	81.6284	19.826
Halictidae	Lasioglossum pruinosiformis	Ponderosa	81.6397	19.826
Halictidae	Lasioglossum pruinosiformis	Ponderosa	81.6502	19.826
Halictidae	Lasioglossum pruinosiformis	Ponderosa	81.6848	19.8267
Halictidae	Lasioglossum pruinosiformis	Ponderosa	81.814	19.8269
Halictidae	Lasioglossum pruinosiformis	Ponderosa	81.8462	19.8269
Halictidae	Lasioglossum pruinosiformis	Ponderosa	81.8654	19.827
Halictidae	Lasioglossum pruinosiformis	Ponderosa	81.9784	19.827
Halictidae	Lasioglossum pruinosiformis	Ponderosa	82.062	19.827
Halictidae	Lasioglossum pruinosiformis	Ponderosa	82.062	19.827
Halictidae	Lasioglossum pruinosiformis	Ponderosa	82.062	19.827
Halictidae	Lasioglossum pruinosiformis	Ponderosa	82.0999	19.827
Halictidae	Lasioglossum pruinosiformis	Ponderosa	82.143	19.8272
Halictidae	Lasioglossum pruinosiformis	Ponderosa	82.1863	19.828
Halictidae	Lasioglossum pruinosiformis	Ponderosa	82.3081	19.8321
Halictidae	Lasioglossum pruinosiformis	Ponderosa	82.3594	19.8321
Halictidae	Lasioglossum pruinosiformis	Ponderosa	82.4731	19.8321
Halictidae	Lasioglossum pruinosiformis	Ponderosa	82.5875	19.8321
Halictidae	Lasioglossum pruinosiformis	Ponderosa	82.615	19.8441
Halictidae	Lasioglossum pruinosiformis	Ponderosa	83.9934	19.8441
Halictidae	Lasioglossum pruinosiformis	Ponderosa	84.0219	19.8441
Halictidae	Lasioglossum pruinosiformis	Ponderosa	84.0398	19.8441
Halictidae	Lasioglossum pruinosiformis	Ponderosa	85.4501	19.8503
Halictidae	Lasioglossum pruinosiformis	Ponderosa	85.476	19.8503
Halictidae	Lasioglossum pruinosiformis	Ponderosa	85.476	19.8503
Halictidae	Lasioglossum pruinosiformis	Ponderosa	85.5064	19.8503
Halictidae	Lasioglossum pruinosiformis	Ponderosa	85.5415	19.9232
Halictidae	Lasioglossum pruinosiformis	Ponderosa	85.6327	19.9232
Halictidae	Lasioglossum pruinosiformis	Ponderosa	85.7224	19.9232
Halictidae	Lasioglossum pruinosiformis	Ponderosa	85.8109	19.9232
Halictidae	Lasioglossum pruinosiformis	Ponderosa	85.8429	20.0259
Halictidae	Lasioglossum pruinosiformis	Ponderosa	85.8603	20.0259
Halictidae	Lasioglossum pruinosiformis	Ponderosa	85.8995	20.0259
Halictidae	Lasioglossum pruinosiformis	Ponderosa	85.9885	20.1602
Halictidae	Lasioglossum pruinosiformis	Ponderosa	86.0738	20.1602
Halictidae	Lasioglossum pruinosiformis	Ponderosa	86.1592	20.1602
Halictidae	Lasioglossum pruinosiformis	Ponderosa	86.1742	20.5631
Halictidae	Lasioglossum pruinosiformis	Ponderosa	86.2435	20.5631
Halictidae	Lasioglossum pruinosiformis	Ponderosa	86.2482	20.5631
Halictidae	Lasioglossum pruinosiformis	Ponderosa	86.2482	21.0803
Halictidae	Lasioglossum pruinosiformis	Ponderosa	86.3258	21.3257
Halictidae	Lasioglossum pruinosiformis	Ponderosa	86.4084	21.3538
Halictidae	Lasioglossum pruinosiformis	Ponderosa	86.42	111.445
Halictidae	Lasioglossum pruinosiformis	Ponderosa	86.441	111.445
Halictidae	Lasioglossum pruinosiformis	Ponderosa	86.4891	113.248
Halictidae	Lasioglossum pruinosiformis	Ponderosa	86.495	113.248
Halictidae	Lasioglossum pruinosiformis	Ponderosa	86.5075	114.73
Halictidae	Lasioglossum pruinosiformis	Ponderosa	86.5699	115.987
Halictidae	Lasioglossum pruinosiformis	Ponderosa	86.6509	115.987
Halictidae	Lasioglossum pruinosiformis	Ponderosa	86.7318	115.987
Halictidae	Lasioglossum pruinosiformis	Spruce-fir	109.137	136.852
Halictidae	Lasioglossum pruinosiformis	Spruce-fir	109.138	136.868
Halictidae	Lasioglossum pruinosiformis	Spruce-fir	109.139	138.716
Halictidae	Lasioglossum pruinosiformis	Spruce-fir	109.139	139.878
Halictidae	Lasioglossum pruinosiformis	Spruce-fir	109.139	139.878
Halictidae	Lasioglossum pruinosiformis	Spruce-fir	109.139	142.883
Halictidae	Lasioglossum pruinosiformis	Spruce-fir	109.139	153.791
Halictidae	Lasioglossum pruinosiformis	Spruce-fir	109.139	154.873
Halictidae	Lasioglossum pruinosiformis	Spruce-fir	109.14	154.873
Halictidae	Lasioglossum pruinosiformis	Spruce-fir	109.14	160.693
Halictidae	Lasioglossum pruinosiformis	Spruce-fir	109.14	164.427
Halictidae	Lasioglossum pruinosiformis	Spruce-fir	109.142	165.217
Halictidae	Lasioglossum pruinosum	Mixed Conifer	93.3716	693.757
Halictidae	Lasioglossum pruinosum	Mixed Conifer	93.4604	693.562
Halictidae	Lasioglossum sisymbrii	Mixed Conifer	93.5556	693.492
Halictidae	Lasioglossum sisymbrii	Mixed Conifer	93.6422	692.554
Halictidae	Lasioglossum sisymbrii	Mixed Conifer	93.6545	692.355
Halictidae	Lasioglossum sisymbrii	Mixed Conifer	93.6889	692.157
Halictidae	Lasioglossum sisymbrii	Ponderosa	86.7965	109.923
Halictidae	Lasioglossum sisymbrii	Ponderosa	86.8116	109.928
Halictidae	Lasioglossum sisymbrii	Ponderosa	86.844	109.929
Halictidae	Lasioglossum sisymbrii	Ponderosa	86.8902	109.93
Halictidae	Lasioglossum sisymbrii	Ponderosa	86.9687	109.93
Halictidae	Lasioglossum sisymbrii	Ponderosa	86.976	109.93
Halictidae	Lasioglossum sisymbrii	Ponderosa	86.9793	109.931
Halictidae	Lasioglossum sisymbrii	Ponderosa	87.046	620.083
Megachilidae	Anthidium porterae	Mixed Conifer	69.5416	141.062
Megachilidae	Anthidium porterae	Mixed Conifer	69.5669	148.045
Megachilidae	Anthidium porterae	Mixed Conifer	69.6932	149.026
Megachilidae	Anthidium porterae	Mixed Conifer	69.7426	151.97
Megachilidae	cehphlosmi	Spruce-fir	75.2499	225.577
Megachilidae	cehphlosmi	Spruce-fir	75.3136	225.85
Megachilidae	Coelioxys gilensis	Ponderosa	65.1353	225.889
Megachilidae	Coelioxys gilensis	Ponderosa	69.7663	226.124
Megachilidae	Coelioxys moesta	Mixed Conifer	69.8199	226.378
Megachilidae	Coelioxys moesta	Mixed Conifer	69.9423	226.399
Megachilidae	Dianthidium cressonii	Mixed Conifer	71.9864	8.94671
Megachilidae	Dianthidium cressonii	Mixed Conifer	72.0184	8.95007
Megachilidae	Dianthidium cressonii	Mixed Conifer	72.1094	8.95091
Megachilidae	Dianthidium cressonii	Mixed Conifer	72.1733	8.95112
Megachilidae	Dianthidium cressonii	Mixed Conifer	72.2301	8.95118
Megachilidae	Dianthidium cressonii	Mixed Conifer	72.2328	8.95119
Megachilidae	Dianthidium cressonii	Mixed Conifer	72.3565	8.95119
Megachilidae	Dianthidium cressonii	Mixed Conifer	72.4103	8.95119
Megachilidae	Dianthidium cressonii	Mixed Conifer	72.4428	8.95119
Megachilidae	Dianthidium cressonii	Mixed Conifer	72.4804	8.95119
Megachilidae	Dianthidium cressonii	Mixed Conifer	72.4806	8.95119
Megachilidae	Dianthidium cressonii	Mixed Conifer	72.6033	8.95119
Megachilidae	Dianthidium cressonii	Ponderosa	71.7415	5.5651
Megachilidae	Dianthidium cressonii	Ponderosa	71.8074	5.5651
Megachilidae	Dianthidium cressonii	Ponderosa	71.8638	8.8794
Megachilidae	Dianthidium cressonii	Ponderosa	71.8897	8.8794
Megachilidae	Dianthidium cressonii	Ponderosa	71.9835	8.93325
Megachilidae	Lithurgus apicalis	Ponderosa	87.1233	616.702
Megachilidae	Lithurgus apicalis	Ponderosa	87.0491	618.64
Megachilidae	MEG ASH 003	Ponderosa	87.2008	614.77
Megachilidae	MEG HER 002	Mixed Conifer	93.8264	690.863
Megachilidae	MEG HER 002	Mixed Conifer	93.8399	688.864
Megachilidae	MEG HER 003	Mixed Conifer	93.9633	687.55
Megachilidae	MEG HER 003	Mixed Conifer	94.0386	686.136
Megachilidae	MEG MEG 006	Mixed Conifer	94.0528	686.117
Megachilidae	MEG MEG 006	Mixed Conifer	94.0796	685.381
Megachilidae	MEG MEG 006	Mixed Conifer	94.1845	683.219
Megachilidae	MEG MEG 006	Mixed Conifer	94.1934	682.497
Megachilidae	MEG MEG 006	Mixed Conifer	94.2158	681.606
Megachilidae	MEG MEG 006	Mixed Conifer	94.2353	681.106
Megachilidae	MEG MEG 006	Mixed Conifer	94.2857	680.396
Megachilidae	MEG MEG 006	Mixed Conifer	94.3859	680.298
Megachilidae	MEG MEG 006	Mixed Conifer	94.4016	679.627
Megachilidae	MEG MEG 006	Mixed Conifer	94.4668	679.549
Megachilidae	MEG MEG 006	Mixed Conifer	94.5442	678.157
Megachilidae	MEG MEG 006	Mixed Conifer	94.5526	678.007
Megachilidae	MEG MEG 006	Mixed Conifer	94.5634	677.772
Megachilidae	MEG MEG 006	Mixed Conifer	94.6215	677.109
Megachilidae	MEG MEG 006	Mixed Conifer	94.6865	674.976
Megachilidae	MEG MEG 006	Mixed Conifer	94.715	673.03
Megachilidae	MEG MEG 006	Mixed Conifer	94.7249	672.852
Megachilidae	MEG MEG 006	Mixed Conifer	94.7515	670.734
Megachilidae	MEG MEG 006	Ponderosa	87.6487	607.501
Megachilidae	MEG MEG 006	Ponderosa	87.6033	608.083
Megachilidae	MEG MEG 006	Ponderosa	87.5742	608.669
Megachilidae	MEG MEG 006	Ponderosa	87.5548	609.012
Megachilidae	MEG MEG 006	Ponderosa	87.4998	610.288
Megachilidae	MEG MEG 006	Ponderosa	87.4994	610.926
Megachilidae	MEG MEG 006	Ponderosa	87.4255	611.042
Megachilidae	MEG MEG 006	Ponderosa	87.3514	611.913
Megachilidae	MEG MEG 006	Ponderosa	87.277	612.845
Megachilidae	MEG MEG 006	Ponderosa	87.2063	613.362
Megachilidae	MEG STE 001	Ponderosa	87.7235	607.104
Megachilidae	Megachile comata	Mixed Conifer	94.7957	669.055
Megachilidae	Megachile comata	Mixed Conifer	94.8173	668.654
Megachilidae	Megachile comata	Mixed Conifer	94.8304	666.949
Megachilidae	Megachile comata	Mixed Conifer	94.8578	666.487
Megachilidae	Megachile comata	Mixed Conifer	94.8735	664.994
Megachilidae	Megachile comata	Mixed Conifer	94.8781	662.903
Megachilidae	Megachile comata	Mixed Conifer	94.9158	660.795
Megachilidae	Megachile comata	Mixed Conifer	94.9336	659.922
Megachilidae	Megachile comata	Mixed Conifer	94.9575	658.675
Megachilidae	Megachile comata	Mixed Conifer	94.9846	657.076
Megachilidae	Megachile comata	Ponderosa	87.7439	606.603
Megachilidae	Megachile comata	Ponderosa	87.7418	607.055
Megachilidae	Megachile fidelis	Mixed Conifer	94.9885	656.561
Megachilidae	Megachile fidelis	Mixed Conifer	94.9987	654.5
Megachilidae	Megachile fidelis	Ponderosa	87.8002	605.446
Megachilidae	Megachile fidelis	Ponderosa	87.7979	606.325
Megachilidae	Megachile frigida	Mixed Conifer	95.0392	653.336
Megachilidae	Megachile frigida	Mixed Conifer	95.0431	652.45
Megachilidae	Megachile melanophaea	Mixed Conifer	95.0792	652.264
Megachilidae	Megachile melanophaea	Mixed Conifer	95.0868	650.4
Megachilidae	Megachile mellitarsis	Mixed Conifer	95.0931	648.381
Megachilidae	Megachile mellitarsis	Mixed Conifer	95.0948	646.729
Megachilidae	Megachile mellitarsis	Ponderosa	87.8284	603.842
Megachilidae	Megachile mellitarsis	Ponderosa	87.8073	605.2
Megachilidae	Megachile montivaga	Mixed Conifer	95.1187	646.364
Megachilidae	Megachile montivaga	Mixed Conifer	95.1425	645.631
Megachilidae	Megachile montivaga	Mixed Conifer	95.1576	645.464
Megachilidae	Megachile montivaga	Mixed Conifer	95.1895	645.016
Megachilidae	Megachile montivaga	Mixed Conifer	95.196	644.412
Megachilidae	Megachile montivaga	Mixed Conifer	95.2025	642.389
Megachilidae	Megachile montivaga	Ponderosa	87.8424	602.244
Megachilidae	Megachile relativa	Mixed Conifer	95.21	640.375
Megachilidae	Megachile relativa	Mixed Conifer	95.21	640.1
Megachilidae	Megachile relativa	Mixed Conifer	95.2309	638.368
Megachilidae	Megachile relativa	Mixed Conifer	95.2339	636.366
Megachilidae	Megachile relativa	Mixed Conifer	95.2369	635.299
Megachilidae	Megachile relativa	Mixed Conifer	95.2666	634.41
Megachilidae	Megachile relativa	Mixed Conifer	95.2713	634.371
Megachilidae	Megachile relativa	Mixed Conifer	95.2935	633.45
Megachilidae	Megachile subanograe	Ponderosa	87.8549	600.651
Megachilidae	Osmia brevis	Mixed Conifer	95.3804	321.567
Megachilidae	Osmia brevis	Mixed Conifer	95.3775	324.982
Megachilidae	Osmia bucephala	Mixed Conifer	95.417	301.215
Megachilidae	Osmia bucephala	Mixed Conifer	95.4157	314.754
Megachilidae	Osmia bucephala	Mixed Conifer	95.3986	320.196
Megachilidae	Osmia bucephala	Mixed Conifer	95.3847	320.583
Megachilidae	Osmia juxta	Mixed Conifer	91.2666	346.904
Megachilidae	Osmia juxta	Mixed Conifer	91.2354	349.207
Megachilidae	Osmia juxta	Mixed Conifer	91.2256	350.004
Megachilidae	Osmia juxta	Mixed Conifer	91.2228	351.494
Megachilidae	Osmia juxta	Mixed Conifer	91.2151	352.133
Megachilidae	Osmia juxta	Mixed Conifer	91.1975	354.147
Megachilidae	Osmia juxta	Mixed Conifer	91.1674	354.182
Megachilidae	Osmia juxta	Mixed Conifer	91.1596	355.945
Megachilidae	Osmia juxta	Mixed Conifer	91.1197	355.951
Megachilidae	Osmia juxta	Mixed Conifer	91.109	356.824
Megachilidae	Osmia juxta	Mixed Conifer	91.0783	356.912
Megachilidae	Osmia juxta	Mixed Conifer	91.0504	356.928
Megachilidae	Osmia juxta	Mixed Conifer	91.0358	359.229
Megachilidae	Osmia juxta	Mixed Conifer	91.0032	359.413
Megachilidae	Osmia juxta	Mixed Conifer	90.993	359.678
Megachilidae	Osmia juxta	Mixed Conifer	90.9501	359.878
Megachilidae	Osmia juxta	Mixed Conifer	90.928	361.499
Megachilidae	Osmia juxta	Mixed Conifer	90.928	361.636
Megachilidae	Osmia juxta	Mixed Conifer	90.928	362.578
Megachilidae	Osmia juxta	Mixed Conifer	90.928	363.188
Megachilidae	Osmia juxta	Mixed Conifer	90.9064	363.449
Megachilidae	Osmia juxta	Mixed Conifer	90.9005	363.638
Megachilidae	Osmia juxta	Mixed Conifer	90.8624	364.886
Megachilidae	Osmia juxta	Mixed Conifer	90.8252	365.343
Megachilidae	Osmia juxta	Mixed Conifer	90.8163	365.938
Megachilidae	Osmia juxta	Mixed Conifer	90.7682	366.865
Megachilidae	Osmia juxta	Mixed Conifer	90.7191	368.181
Megachilidae	Osmia juxta	Mixed Conifer	90.6699	370.668
Megachilidae	Osmia juxta	Mixed Conifer	90.62	370.821
Megachilidae	Osmia juxta	Mixed Conifer	90.6041	373.123
Megachilidae	Osmia juxta	Mixed Conifer	90.5679	375.762
Megachilidae	Osmia juxta	Mixed Conifer	90.5152	382.784
Megachilidae	Osmia juxta	Mixed Conifer	90.4792	383.84
Megachilidae	Osmia juxta	Mixed Conifer	90.4621	385.031
Megachilidae	Osmia juxta	Mixed Conifer	90.4452	387.295
Megachilidae	Osmia juxta	Mixed Conifer	90.4087	387.772
Megachilidae	Osmia juxta	Mixed Conifer	90.3022	387.825
Megachilidae	Osmia juxta	Mixed Conifer	90.3554	387.825
Megachilidae	Osmia juxta	Mixed Conifer	90.3783	387.825
Megachilidae	Osmia juxta	Mixed Conifer	90.2491	388.419
Megachilidae	Osmia juxta	Mixed Conifer	90.1947	388.567
Megachilidae	Osmia juxta	Mixed Conifer	90.1402	388.711
Megachilidae	Osmia juxta	Mixed Conifer	90.0857	388.715
Megachilidae	Osmia juxta	Mixed Conifer	90.0555	389.012
Megachilidae	Osmia juxta	Mixed Conifer	90.0313	389.57
Megachilidae	Osmia juxta	Mixed Conifer	90.0021	390.367
Megachilidae	Osmia juxta	Mixed Conifer	89.9771	392.679
Megachilidae	Osmia juxta	Mixed Conifer	89.9516	392.873
Megachilidae	Osmia juxta	Mixed Conifer	89.9351	393.219
Megachilidae	Osmia juxta	Mixed Conifer	89.9228	395.855
Megachilidae	Osmia juxta	Mixed Conifer	89.883	396.725
Megachilidae	Osmia juxta	Mixed Conifer	89.8683	397.813
Megachilidae	Osmia juxta	Mixed Conifer	89.8137	400.486
Megachilidae	Osmia juxta	Mixed Conifer	89.7592	402.068
Megachilidae	Osmia juxta	Mixed Conifer	89.7047	402.52
Megachilidae	Osmia juxta	Mixed Conifer	89.6497	403.453
Megachilidae	Osmia juxta	Mixed Conifer	89.5946	403.55
Megachilidae	Osmia juxta	Mixed Conifer	89.5881	407.281
Megachilidae	Osmia juxta	Mixed Conifer	89.5392	408.437
Megachilidae	Osmia juxta	Mixed Conifer	89.515	413.343
Megachilidae	Osmia juxta	Mixed Conifer	89.4837	413.395
Megachilidae	Osmia juxta	Mixed Conifer	89.4277	418.526
Megachilidae	Osmia juxta	Mixed Conifer	89.3713	423.731
Megachilidae	Osmia juxta	Mixed Conifer	89.3147	430.349
Megachilidae	Osmia juxta	Mixed Conifer	89.2564	430.939
Megachilidae	Osmia juxta	Mixed Conifer	89.1965	431.519
Megachilidae	Osmia juxta	Mixed Conifer	89.1735	432
Megachilidae	Osmia juxta	Mixed Conifer	91.2836	443.446
Megachilidae	Osmia juxta	Mixed Conifer	91.2728	451.706
Megachilidae	Osmia juxta	Mixed Conifer	89.1363	533.594
Megachilidae	Osmia juxta	Mixed Conifer	89.0749	534.74
Megachilidae	Osmia juxta	Mixed Conifer	89.0136	538.656
Megachilidae	Osmia juxta	Mixed Conifer	89.0005	544.484
Megachilidae	Osmia juxta	Mixed Conifer	88.9524	549.713
Megachilidae	Osmia juxta	Mixed Conifer	88.8999	555.632
Megachilidae	Osmia juxta	Mixed Conifer	88.8912	559.219
Megachilidae	Osmia juxta	Mixed Conifer	88.83	560.211
Megachilidae	Osmia juxta	Mixed Conifer	88.8156	560.368
Megachilidae	Osmia juxta	Mixed Conifer	88.7683	560.587
Megachilidae	Osmia juxta	Mixed Conifer	88.7313	560.78
Megachilidae	Osmia juxta	Mixed Conifer	88.7115	560.855
Megachilidae	Osmia juxta	Mixed Conifer	88.7058	560.908
Megachilidae	Osmia juxta	Mixed Conifer	88.6415	561.008
Megachilidae	Osmia juxta	Mixed Conifer	88.5769	561.061
Megachilidae	Osmia juxta	Mixed Conifer	88.5114	561.291
Megachilidae	Osmia juxta	Mixed Conifer	88.4992	561.373
Megachilidae	Osmia juxta	Mixed Conifer	88.476	561.419
Megachilidae	Osmia juxta	Mixed Conifer	88.4458	561.451
Megachilidae	Osmia juxta	Mixed Conifer	88.4344	561.586
Megachilidae	Osmia juxta	Mixed Conifer	88.3783	561.604
Megachilidae	Osmia juxta	Mixed Conifer	88.3293	561.636
Megachilidae	Osmia juxta	Mixed Conifer	88.3087	561.783
Megachilidae	Osmia juxta	Mixed Conifer	88.237	561.79
Megachilidae	Osmia juxta	Mixed Conifer	88.1655	561.999
Megachilidae	Osmia juxta	Ponderosa	88.1574	287.575
Megachilidae	Osmia juxta	Ponderosa	88.0929	288.391
Megachilidae	Osmia juxta	Ponderosa	88.0881	288.401
Megachilidae	Osmia juxta	Ponderosa	88.0448	288.411
Megachilidae	Osmia juxta	Ponderosa	88.02	288.43
Megachilidae	Osmia juxta	Ponderosa	88.0188	288.508
Megachilidae	Osmia juxta	Ponderosa	88.0015	288.819
Megachilidae	Osmia juxta	Ponderosa	87.9907	290.064
Megachilidae	Osmia juxta	Ponderosa	87.9842	293.801
Megachilidae	Osmia juxta	Ponderosa	87.9839	295.042
Megachilidae	Osmia juxta	Ponderosa	87.9816	295.157
Megachilidae	Osmia juxta	Ponderosa	87.9799	297.683
Megachilidae	Osmia juxta	Spruce-fir	109.384	484.369
Megachilidae	Osmia juxta	Spruce-fir	109.384	487.995
Megachilidae	Osmia juxta	Spruce-fir	109.292	489.821
Megachilidae	Osmia juxta	Spruce-fir	109.292	495.762
Megachilidae	Osmia juxta	Spruce-fir	109.254	500.083
Megachilidae	Osmia juxta	Spruce-fir	109.235	503.98
Megachilidae	Osmia juxta	Spruce-fir	109.216	504.988
Megachilidae	Osmia juxta	Spruce-fir	109.2	511.177
Megachilidae	Osmia juxta	Spruce-fir	109.2	513.446
Megachilidae	Osmia juxta	Spruce-fir	109.178	519.767
Megachilidae	Osmia juxta	Spruce-fir	109.163	520.446
Megachilidae	Osmia juxta	Spruce-fir	109.155	524.615
Megachilidae	Osmia juxta	Spruce-fir	109.149	526.907
Megachilidae	Osmia juxta	Spruce-fir	109.143	527.253
Megachilidae	Osmia texana	Ponderosa	91.7609	478.448
Megachilidae	Osmia texana	Spruce-fir	113.053	456.66
Megachilidae	Osmia texana	Spruce-fir	113.053	457.957
Megachilidae	Osmia texana	Spruce-fir	113.053	460.102
Megachilidae	Osmia texana	Spruce-fir	110.118	461.244
Megachilidae	Osmia texana	Spruce-fir	110.118	469.729
Megachilidae	Osmia texana	Spruce-fir	109.751	470.329
